# Supplementary material for: Single-cell profiling of gastric cancer ascites reveals immunosuppressive remodeling and an epithelial-immune dual phenotype signature predictive for PD-1 immunotherapy responses
Source: Research Square preprint supplement (doi:10.21203/rs.3.rs-7763100/v1), 2025-10-27
Supplement: Supplementary file 1 [file eee9899fbd2e234713b588a2.xlsx]

## Sheet: Supplementary Data 1
Supplementary Data 1. The clinical characteristics and metric information of MA and PBMC samples.
Sample ID	Sample Type	Sex	Age (year)	Disease stage at time of sampling	Tretment status when sampling	Upfront treatments (surgery or neoadjuvant chemotherapy)	Reads	Mean Reads per Cell	Median Genes per Cell	Median UMI Counts per Cell	Cells (before filtering )	Cells (after filtering)	batch id
RM001_MA	MA	female	76	Ⅳ	Treatment-naïve	No treatment	312334039	17776	1109	2577	15326	9516	1
RM001_PBMC	PBMC						311078489	22273	1139	2422	12529	9730	1
ZQQ003_MA	MA	female	33	Ⅳ	No treatment received within the past two months	Neoadjuvant chemotherapy	490258212	31982	1813	3329	13361	11105	2
ZQQ003_PBMC	PBMC						410456967	35554	1318	2885	10092	8788	2
LFQ004_MA	MA	male	69	Ⅳ	Treatment-naïve	No treatment	316922433	20044	1891	4198	12414	8852	3
LFQ004_PBMC	PBMC						304193035	23193	1556	3307	11409	9834	3
S005ZJM_MA	MA	male	51	rⅣ	No treatment received within the past two months	Chemotherapy combined with immunotherapy	331602215	14849	1365	3066	13781	8021	4
S005ZJM_PBMC	PBMC						417903426	25393	1729	3563	14360	12153	4
S006SWQ_MA	MA	male	69	Ⅳ	Treatment-naïve	No treatment	384923688	32283	1936	4035	10671	9566	4
S006SWQ_PBMC	PBMC						330807910	27358	1724	3837	10559	9334	4
S007LXX_MA	MA	female	63	Ⅳ	No treatment received within the past two months	Chemotherapy	32291183	2954	1025	1749	9872	7139	5
S007LXX_PBMC	PBMC						379844953	25994	2190	5486	13655	11335	5
S008ZJF_MA	MA	male	68	Ⅳ	Treatment-naïve	No treatment	328570232	31934	2166	5596	9700	8724	5
S008ZJF_PBMC	PBMC						418635285	30818	2342	6572	12423	10625	5
S009ZHX_MA	MA	female	56	Ⅳ	Treatment-naïve	No treatment	523284288	35826	4801	19125	13201	10168	6
S009ZHX_PBMC	PBMC						36141927	4655	967	1669	7213	5093	6
S010YGF_MA	MA	female	60	Ⅳ	Treatment-naïve	No treatment	517548446	37200	3075	10042	12190	9427	7
S010YGF_PBMC	PBMC						723093964	40742	2177	5672	16252	13239	7
S012WRJ_MA	MA	female	38	Ⅳ	Treatment-naïve	No treatment	404366014	26474	2882	8173	13606	11056	8
S012WRJ_PBMC	PBMC						358589527	39122	2546	6891	8339	6687	8

## Sheet: Supplementary Data 2
Supplementary Data 2. Differentially expressed genes in GCMA and PBMC in different cell types
p_val	avg_log2FC	pct.1	pct.2	p_val_adj	cluster	gene	pct.diff
0	2.78827	0.845	0.224	0	T cells	IL7R	0.621
0	2.6294	0.822	0.232	0	T cells	LTB	0.59
0	2.33452	0.636	0.118	0	T cells	LEF1	0.518
0	2.18908	0.757	0.19	0	T cells	CAMK4	0.567
0	2.13495	0.65	0.269	0	T cells	ANK3	0.381
0	1.82504	0.752	0.417	0	T cells	PDE3B	0.335
0	1.76511	0.7	0.341	0	T cells	BCL2	0.359
0	1.76129	0.601	0.128	0	T cells	TCF7	0.473
0	1.65661	0.506	0.077	0	T cells	CCR7	0.429
0	1.65412	0.745	0.385	0	T cells	INPP4B	0.36
0	1.58401	0.978	0.935	0	T cells	RPS29	0.043
0	1.57775	0.981	0.959	0	T cells	RPS12	0.022
0	1.57067	0.986	0.972	0	T cells	RPS27	0.014
0	1.52754	0.969	0.915	0	T cells	RPS25	0.054
0	1.52612	0.324	0.059	0	T cells	NELL2	0.265
0	1.4973	0.989	0.965	0	T cells	RPL13	0.024
0	1.49688	0.393	0.158	0	T cells	FAAH2	0.235
0	1.48962	0.737	0.255	0	T cells	BCL11B	0.482
0	1.48713	0.331	0.119	0	T cells	TSHZ2	0.212
0	1.4583	0.893	0.407	0	T cells	IL32	0.486
0	1.42758	0.971	0.914	0	T cells	RPL36	0.057
0	1.42282	0.984	0.966	0	T cells	RPLP2	0.018
0	1.3972	0.615	0.289	0	T cells	CD69	0.326
0	1.38864	0.98	0.94	0	T cells	RPL3	0.04
0	1.38768	0.988	0.962	0	T cells	RPL13A	0.026
0	1.38677	0.986	0.974	0	T cells	RPL10	0.012
0	1.37946	0.985	0.966	0	T cells	RPS6	0.019
0	1.37454	0.924	0.763	0	T cells	RPL23A	0.161
0	1.37427	0.764	0.324	0	T cells	CD96	0.44
0	1.37116	0.75	0.221	0	T cells	CD3E	0.529
0	1.36944	0.8	0.229	0	T cells	CD3D	0.571
0	1.35814	0.973	0.934	0	T cells	RPS28	0.039
0	1.34046	0.718	0.313	0	T cells	ETS1	0.405
0	1.33139	0.981	0.964	0	T cells	RPS14	0.017
0	1.32531	0.97	0.93	0	T cells	RPL21	0.04
0	1.31864	0.558	0.166	0	T cells	ITK	0.392
0	1.31772	0.981	0.952	0	T cells	RPS8	0.029
0	1.31123	0.981	0.953	0	T cells	RPS3	0.028
0	1.311	0.977	0.955	0	T cells	RPL31	0.022
0	1.30772	0.937	0.845	0	T cells	RPS5	0.092
0	1.30648	0.612	0.223	0	T cells	RHOH	0.389
0	1.30007	0.944	0.862	0	T cells	RPL30	0.082
0	1.29764	0.653	0.323	0	T cells	CXCR4	0.33
0	1.2963	0.97	0.937	0	T cells	RPL34	0.033
0	1.29256	0.969	0.939	0	T cells	RPL41	0.03
0	1.28749	0.525	0.178	0	T cells	BACH2	0.347
0	1.28373	0.988	0.98	0	T cells	RPS18	0.008
0	1.28142	0.977	0.951	0	T cells	RPL11	0.026
0	1.2709	0.967	0.9	0	T cells	RPL18	0.067
0	1.26748	0.932	0.831	0	T cells	RPS23	0.101
0	1.25949	0.914	0.827	0	T cells	RPS3A	0.087
0	1.25469	0.576	0.316	0	T cells	CDC14A	0.26
0	1.25402	0.977	0.948	0	T cells	RPL27A	0.029
0	1.25209	0.958	0.897	0	T cells	RPL10A	0.061
0	1.25105	0.973	0.931	0	T cells	RPL18A	0.042
0	1.2509	0.413	0.074	0	T cells	TRAT1	0.339
0	1.24428	0.822	0.628	0	T cells	RPS15A	0.194
0	1.23851	0.564	0.341	0	T cells	SERINC5	0.223
0	1.23131	0.644	0.321	0	T cells	PCED1B	0.323
0	1.21963	0.972	0.938	0	T cells	RPL37	0.034
0	1.21469	0.558	0.225	0	T cells	ZEB1	0.333
0	1.1968	0.412	0.095	0	T cells	PRKCQ-AS1	0.317
0	1.19147	0.542	0.231	0	T cells	MLLT3	0.311
0	1.18865	0.968	0.919	0	T cells	RPL14	0.049
0	1.18792	0.718	0.286	0	T cells	CD2	0.432
0	1.18548	0.448	0.208	0	T cells	LINC01934	0.24
0	1.18351	0.952	0.9	0	T cells	RPL38	0.052
0	1.18102	0.981	0.953	0	T cells	RPL19	0.028
0	1.1809	0.619	0.249	0	T cells	TRBC2	0.37
0	1.17426	0.79	0.528	0	T cells	NOP53	0.262
0	1.17118	0.986	0.97	0	T cells	RPS19	0.016
0	1.16885	0.95	0.873	0	T cells	RPSA	0.077
0	1.16128	0.537	0.235	0	T cells	ABLIM1	0.302
0	1.15933	0.973	0.934	0	T cells	RPS15	0.039
0	1.14645	0.975	0.95	0	T cells	RPS27A	0.025
0	1.14303	0.446	0.163	0	T cells	TXK	0.283
0	1.14221	0.947	0.869	0	T cells	RPL29	0.078
0	1.14138	0.878	0.734	0	T cells	EEF1B2	0.144
0	1.13635	0.373	0.16	0	T cells	PLCL1	0.213
0	1.1318	0.764	0.435	0	T cells	KLF12	0.329
0	1.13016	0.417	0.095	0	T cells	TESPA1	0.322
0	1.13007	0.804	0.575	0	T cells	ARHGAP15	0.229
0	1.12487	0.66	0.248	0	T cells	THEMIS	0.412
0	1.12313	0.984	0.967	0	T cells	RPL28	0.017
0	1.11546	0.959	0.914	0	T cells	RPS21	0.045
0	1.11363	0.974	0.952	0	T cells	RPS16	0.022
0	1.11149	0.964	0.938	0	T cells	RPS13	0.026
0	1.11112	0.973	0.945	0	T cells	RPS20	0.028
0	1.08696	0.671	0.203	0	T cells	CD3G	0.468
0	1.07099	0.524	0.243	0	T cells	OXNAD1	0.281
0	1.07011	0.703	0.376	0	T cells	GIMAP7	0.327
0	1.06997	0.972	0.947	0	T cells	RPL12	0.025
0	1.06832	0.987	0.986	0	T cells	RPLP1	0.001
0	1.06502	0.469	0.233	0	T cells	NOSIP	0.236
0	1.06036	0.988	0.984	0	T cells	EEF1A1	0.004
0	1.05853	0.763	0.406	0	T cells	SKAP1	0.357
0	1.05154	0.967	0.931	0	T cells	RPL35	0.036
0	1.04501	0.498	0.153	0	T cells	TRAC	0.345
0	1.04428	0.955	0.907	0	T cells	RPL27	0.048
0	1.02666	0.855	0.546	0	T cells	CD52	0.309
0	1.02518	0.766	0.53	0	T cells	GAS5	0.236
0	1.00935	0.975	0.953	0	T cells	RPS2	0.022
0	1.00837	0.297	0.026	0	T cells	MAL	0.271
0	1.00259	0.536	0.308	0	T cells	LEPROTL1	0.228
0	1.00017	0.936	0.861	0	T cells	RPL24	0.075
0	0.99533	0.486	0.147	0	T cells	CD6	0.339
0	0.990083	0.81	0.531	0	T cells	SYNE2	0.279
0	0.987646	0.422	0.15	0	T cells	DGKA	0.272
0	0.987295	0.966	0.918	0	T cells	RPL6	0.048
0	0.983133	0.759	0.622	0	T cells	SARAF	0.137
0	0.982954	0.363	0.154	0	T cells	PSMA1	0.209
0	0.977501	0.428	0.145	0	T cells	PIK3IP1	0.283
0	0.971992	0.834	0.801	0	T cells	RPS26	0.033
0	0.971353	0.57	0.288	0	T cells	TLE5	0.282
0	0.971078	0.653	0.454	0	T cells	SNHG29	0.199
0	0.970144	0.528	0.202	0	T cells	SCML4	0.326
0	0.966512	0.775	0.592	0	T cells	EEF1D	0.183
0	0.962937	0.532	0.212	0	T cells	SPOCK2	0.32
0	0.961151	0.89	0.818	0	T cells	RPL39	0.072
0	0.961092	0.289	0.045	0	T cells	RASGRF2	0.244
0	0.957804	0.507	0.206	0	T cells	RASGRP1	0.301
0	0.952232	0.659	0.367	0	T cells	TC2N	0.292
0	0.949938	0.968	0.942	0	T cells	RPL37A	0.026
0	0.949737	0.479	0.159	0	T cells	CD7	0.32
0	0.94923	0.941	0.872	0	T cells	FAU	0.069
0	0.943894	0.83	0.69	0	T cells	TOMM7	0.14
0	0.942499	0.551	0.408	0	T cells	CASK	0.143
0	0.935869	0.472	0.161	0	T cells	FCMR	0.311
0	0.931889	0.299	0.042	0	T cells	LINC01550	0.257
0	0.922352	0.39	0.198	0	T cells	DUSP16	0.192
0	0.913598	0.929	0.864	0	T cells	RPL23	0.065
0	0.911945	0.528	0.178	0	T cells	LCK	0.35
0	0.906183	0.942	0.884	0	T cells	RACK1	0.058
0	0.900816	0.664	0.475	0	T cells	SNHG6	0.189
0	0.89682	0.965	0.929	0	T cells	RPS7	0.036
0	0.893399	0.942	0.897	0	T cells	RPL4	0.045
0	0.883685	0.795	0.653	0	T cells	FXYD5	0.142
0	0.881399	0.272	0.084	0	T cells	TAFA1	0.188
0	0.880469	0.481	0.298	0	T cells	HIVEP2	0.183
0	0.880346	0.391	0.126	0	T cells	ITM2A	0.265
0	0.87713	0.312	0.051	0	T cells	CD28	0.261
0	0.87369	0.672	0.435	0	T cells	CLEC2D	0.237
0	0.873117	0.518	0.252	0	T cells	ISG20	0.266
0	0.86178	0.908	0.851	0	T cells	RPL9	0.057
0	0.858766	0.948	0.899	0	T cells	RPL7A	0.049
0	0.856296	0.284	0.07	0	T cells	TRABD2A	0.214
0	0.85374	0.685	0.5	0	T cells	EPB41	0.185
0	0.853366	0.957	0.92	0	T cells	RPLP0	0.037
0	0.852942	0.563	0.419	0	T cells	MDFIC	0.144
0	0.834833	0.626	0.335	0	T cells	EVL	0.291
0	0.823772	0.394	0.204	0	T cells	NR3C2	0.19
0	0.814129	0.511	0.239	0	T cells	PRKCQ	0.272
0	0.813807	0.83	0.711	0	T cells	SRSF5	0.119
0	0.810446	0.489	0.303	0	T cells	AKT3	0.186
0	0.806603	0.573	0.475	0	T cells	ARID5B	0.098
0	0.804888	0.371	0.127	0	T cells	ZNF831	0.244
0	0.80232	0.966	0.94	0	T cells	RPS9	0.026
0	0.797982	0.261	0.092	0	T cells	SATB1-AS1	0.169
0	0.78627	0.619	0.366	0	T cells	TRAF3IP3	0.253
0	0.786223	0.553	0.282	0	T cells	STAT4	0.271
0	0.786084	0.467	0.223	0	T cells	ACAP1	0.244
0	0.784614	0.935	0.893	0	T cells	RPL7	0.042
0	0.778301	0.578	0.357	0	T cells	TNIK	0.221
0	0.77616	0.658	0.44	0	T cells	SLFN5	0.218
0	0.757177	0.616	0.472	0	T cells	PAG1	0.144
0	0.755389	0.667	0.488	0	T cells	EMB	0.179
0	0.753608	0.768	0.661	0	T cells	COMMD6	0.107
0	0.750984	0.958	0.934	0	T cells	RPL8	0.024
0	0.746825	0.469	0.2	0	T cells	LBH	0.269
0	0.745152	0.624	0.432	0	T cells	SEPTIN6	0.192
0	0.735302	0.376	0.226	0	T cells	CCDC7	0.15
0	0.733721	0.703	0.459	0	T cells	SLC38A1	0.244
0	0.728757	0.789	0.692	0	T cells	ZBTB20	0.097
0	0.72817	0.633	0.521	0	T cells	GCC2	0.112
0	0.724426	0.391	0.214	0	T cells	DOCK9	0.177
0	0.718061	0.257	0.14	0	T cells	AKAP7	0.117
0	0.717622	0.624	0.491	0	T cells	CCSER2	0.133
0	0.712475	0.838	0.698	0	T cells	DOCK10	0.14
0	0.709393	0.843	0.758	0	T cells	COX7C	0.085
0	0.707745	0.958	0.917	0	T cells	RPS11	0.041
0	0.707716	0.26	0.072	0	T cells	ABCD2	0.188
0	0.706768	0.422	0.278	0	T cells	SNHG8	0.144
0	0.705206	0.288	0.097	0	T cells	GATA3	0.191
0	0.700605	0.449	0.249	0	T cells	GYPC	0.2
0	0.699686	0.352	0.16	0	T cells	PBXIP1	0.192
0	0.693424	0.394	0.256	0	T cells	TTC39C	0.138
0	0.688616	0.295	0.13	0	T cells	ZNF101	0.165
0	0.688425	0.919	0.759	0	T cells	FYB1	0.16
0	0.687595	0.678	0.304	0	T cells	CD247	0.374
0	0.682754	0.613	0.435	0	T cells	GIMAP4	0.178
0	0.681574	0.864	0.783	0	T cells	PNRC1	0.081
0	0.678532	0.728	0.603	0	T cells	SNRPD2	0.125
0	0.678102	0.814	0.712	0	T cells	RPL36AL	0.102
0	0.672753	0.425	0.291	0	T cells	ODF2L	0.134
0	0.672044	0.644	0.406	0	T cells	PRKCH	0.238
0	0.671143	0.535	0.413	0	T cells	SMDT1	0.122
0	0.669788	0.585	0.436	0	T cells	RBL2	0.149
0	0.665117	0.519	0.38	0	T cells	CEP85L	0.139
0	0.663623	0.279	0.077	0	T cells	CD5	0.202
0	0.663212	0.656	0.523	0	T cells	TNFAIP8	0.133
0	0.660839	0.572	0.429	0	T cells	RASA3	0.143
0	0.657443	0.281	0.161	0	T cells	TBC1D4	0.12
0	0.655367	0.411	0.227	0	T cells	TNRC6C	0.184
0	0.651399	0.421	0.19	0	T cells	SLFN12L	0.231
0	0.650606	0.533	0.413	0	T cells	MGAT4A	0.12
0	0.649568	0.797	0.689	0	T cells	HINT1	0.108
0	0.648811	0.749	0.671	0	T cells	TMEM123	0.078
0	0.647576	0.923	0.902	0	T cells	TPT1	0.021
0	0.647168	0.809	0.589	0	T cells	RIPOR2	0.22
0	0.644804	0.396	0.28	0	T cells	PCNX2	0.116
0	0.644759	0.748	0.685	0	T cells	CDC42SE2	0.063
0	0.642658	0.57	0.364	0	T cells	PLAAT4	0.206
0	0.641423	0.355	0.227	0	T cells	FOXP1	0.128
0	0.639047	0.382	0.273	0	T cells	ATF7IP2	0.109
0	0.638488	0.491	0.372	0	T cells	PLP2	0.119
0	0.636124	0.386	0.176	0	T cells	TRBC1	0.21
0	0.635572	0.48	0.314	0	T cells	STK17A	0.166
0	0.63294	0.273	0.137	0	T cells	TRADD	0.136
0	0.629385	0.276	0.114	0	T cells	FAM102A	0.162
0	0.628864	0.783	0.623	0	T cells	IKZF1	0.16
0	0.623036	0.548	0.453	0	T cells	CNOT6L	0.095
0	0.622885	0.568	0.449	0	T cells	MPHOSPH8	0.119
0	0.621252	0.55	0.423	0	T cells	GPRIN3	0.127
0	0.621221	0.909	0.865	0	T cells	TXNIP	0.044
0	0.61794	0.529	0.418	0	T cells	ATM	0.111
0	0.615391	0.316	0.117	0	T cells	S1PR1	0.199
0	0.614063	0.445	0.256	0	T cells	GVINP1	0.189
0	0.602579	0.662	0.604	0	T cells	RESF1	0.058
0	0.60195	1	0.997	0	T cells	MALAT1	0.003
0	0.599959	0.807	0.751	0	T cells	NACA	0.056
0	0.599502	0.474	0.371	0	T cells	ARHGEF18	0.103
0	0.597711	0.458	0.332	0	T cells	STAT5B	0.126
0	0.595599	0.603	0.499	0	T cells	EIF3F	0.104
0	0.594859	0.597	0.535	0	T cells	ITGA4	0.062
0	0.594806	0.639	0.518	0	T cells	CCND3	0.121
0	0.594368	0.583	0.498	0	T cells	LINC01619	0.085
0	0.59282	0.62	0.58	0	T cells	ANKRD12	0.04
0	0.591402	0.267	0.12	0	T cells	NCK2	0.147
0	0.589267	0.439	0.253	0	T cells	PATJ	0.186
0	0.587902	0.852	0.79	0	T cells	BTF3	0.062
0	0.585067	0.401	0.278	0	T cells	CDKN1B	0.123
0	0.580113	0.562	0.484	0	T cells	PPP1R2	0.078
0	0.578768	0.561	0.421	0	T cells	PTPN4	0.14
0	0.575009	0.908	0.753	0	T cells	ARHGDIB	0.155
0	0.572332	0.445	0.345	0	T cells	UXT	0.1
0	0.572159	0.656	0.558	0	T cells	ZFP36L2	0.098
0	0.570564	0.31	0.178	0	T cells	EEF1A1P5	0.132
0	0.569795	0.261	0.12	0	T cells	TMEM156	0.141
0	0.562724	0.287	0.161	0	T cells	CSGALNACT1	0.126
0	0.561053	0.577	0.489	0	T cells	CBLB	0.088
0	0.560179	0.429	0.197	0	T cells	GRAP2	0.232
0	0.559447	0.405	0.236	0	T cells	OCIAD2	0.169
0	0.55884	0.354	0.234	0	T cells	SFXN1	0.12
0	0.557036	0.814	0.697	0	T cells	MYL12A	0.117
0	0.555418	0.51	0.417	0	T cells	NAP1L4	0.093
0	0.553756	0.481	0.4	0	T cells	SENP7	0.081
0	0.553221	0.62	0.533	0	T cells	AAK1	0.087
0	0.55288	0.714	0.655	0	T cells	PNISR	0.059
0	0.549659	0.309	0.12	0	T cells	SLFN12L.1	0.189
0	0.548249	0.56	0.54	0	T cells	TAB2	0.02
0	0.54348	0.46	0.367	0	T cells	EIF3L	0.093
0	0.543322	0.541	0.461	0	T cells	PRMT2	0.08
0	0.542127	0.265	0.172	0	T cells	ZC3H8	0.093
0	0.541618	0.313	0.168	0	T cells	GOLGA8B	0.145
0	0.541241	0.687	0.617	0	T cells	BTG1	0.07
0	0.534903	0.534	0.452	0	T cells	DDX24	0.082
0	0.533531	0.981	0.958	0	T cells	MT-ND3	0.023
0	0.531501	0.535	0.425	0	T cells	SYNRG	0.11
0	0.530984	0.589	0.548	0	T cells	PACS1	0.041
0	0.530087	0.536	0.443	0	T cells	TUT4	0.093
0	0.525507	0.307	0.197	0	T cells	CCDC66	0.11
0	0.521361	0.413	0.331	0	T cells	PDCD4	0.082
0	0.51862	0.276	0.152	0	T cells	HELB	0.124
0	0.516693	0.262	0.154	0	T cells	GPR155	0.108
0	0.509748	0.481	0.436	0	T cells	NDFIP1	0.045
0	0.509605	0.524	0.425	0	T cells	PSIP1	0.099
0	0.508654	0.503	0.362	0	T cells	PRKACB	0.141
0	0.508113	0.865	0.777	0	T cells	NPM1	0.088
0	0.507387	0.901	0.878	0	T cells	MBNL1	0.023
0	0.506713	0.255	0.135	0	T cells	LINS1	0.12
0	0.505356	0.272	0.159	0	T cells	TARS3	0.113
0	0.505314	0.706	0.552	0	T cells	RAC2	0.154
0	0.503494	0.757	0.701	0	T cells	TNRC6B	0.056
0	0.502782	0.473	0.368	0	T cells	ANKRD36	0.105
0	0.500253	0.484	0.393	0	T cells	CNN2	0.091
0	0.499274	0.309	0.186	0	T cells	LINC01138	0.123
0	0.495869	0.349	0.259	0	T cells	CYLD	0.09
0	0.494941	0.663	0.619	0	T cells	ADD3	0.044
0	0.494735	0.635	0.586	0	T cells	ZC3HAV1	0.049
0	0.493048	0.834	0.772	0	T cells	JAK1	0.062
0	0.489927	0.505	0.45	0	T cells	EPC1	0.055
0	0.488591	0.524	0.452	0	T cells	ARHGEF3	0.072
0	0.488407	0.287	0.184	0	T cells	NMRK1	0.103
0	0.482851	0.76	0.713	0	T cells	EEF2	0.047
0	0.479477	0.448	0.398	0	T cells	PCGF5	0.05
0	0.479113	0.358	0.249	0	T cells	MZT2A	0.109
0	0.478574	0.651	0.598	0	T cells	FAM107B	0.053
0	0.478403	0.262	0.121	0	T cells	ICAM3	0.141
0	0.477921	0.54	0.472	0	T cells	APRT	0.068
0	0.476289	0.574	0.532	0	T cells	PIK3R1	0.042
0	0.47528	0.327	0.236	0	T cells	RSBN1	0.091
0	0.475034	0.3	0.166	0	T cells	GBP5	0.134
0	0.471413	0.62	0.506	0	T cells	H4C3	0.114
0	0.467858	0.263	0.107	0	T cells	LY9	0.156
0	0.464592	0.564	0.522	0	T cells	TTC3	0.042
0	0.462197	0.492	0.421	0	T cells	CIRBP	0.071
0	0.461219	0.719	0.578	0	T cells	GMFG	0.141
0	0.459578	0.871	0.806	0	T cells	CALM1	0.065
0	0.458387	0.355	0.252	0	T cells	OPTN	0.103
0	0.449764	0.541	0.482	0	T cells	MCUB	0.059
0	0.449733	0.486	0.427	0	T cells	SMCHD1	0.059
0	0.446608	0.653	0.61	0	T cells	PPP2R5C	0.043
0	0.444832	0.269	0.168	0	T cells	CENPK	0.101
0	0.444261	0.259	0.14	0	T cells	BIN1	0.119
0	0.44296	0.302	0.197	0	T cells	GIMAP2	0.105
0	0.440348	0.573	0.532	0	T cells	SF1	0.041
0	0.43979	0.995	0.994	0	T cells	B2M	0.001
0	0.439046	0.562	0.5	0	T cells	EIF4A2	0.062
0	0.438481	0.309	0.17	0	T cells	SIDT1	0.139
0	0.437768	0.41	0.341	0	T cells	ISCU	0.069
0	0.437513	0.374	0.218	0	T cells	CARD11	0.156
0	0.435321	0.472	0.272	0	T cells	IKZF3	0.2
0	0.432329	0.252	0.134	0	T cells	ICAM2	0.118
0	0.429012	0.576	0.508	0	T cells	PITPNC1	0.068
0	0.427444	0.682	0.634	0	T cells	ARL6IP5	0.048
0	0.427323	0.329	0.223	0	T cells	TMC8	0.106
0	0.427162	0.418	0.333	0	T cells	PEBP1	0.085
0	0.426815	0.712	0.674	0	T cells	STK4	0.038
0	0.424086	0.567	0.524	0	T cells	NSD3	0.043
0	0.421912	0.271	0.165	0	T cells	PPP1R16B	0.106
0	0.421774	0.552	0.447	0	T cells	GPSM3	0.105
0	0.419024	0.616	0.581	0	T cells	EIF3E	0.035
0	0.412725	0.555	0.457	0	T cells	CYTIP	0.098
0	0.412209	0.264	0.179	0	T cells	XPC	0.085
0	0.411154	0.655	0.608	0	T cells	LRBA	0.047
0	0.411147	0.265	0.118	0	T cells	NLRC3	0.147
0	0.409022	0.538	0.472	0	T cells	ARHGAP25	0.066
0	0.408346	0.28	0.191	0	T cells	ITPKB	0.089
0	0.405394	0.306	0.179	0	T cells	CYFIP2	0.127
0	0.404521	0.482	0.412	0	T cells	CUTA	0.07
0	0.402206	0.539	0.466	0	T cells	SORL1	0.073
0	0.40064	0.652	0.615	0	T cells	UQCRB	0.037
0	0.395237	0.256	0.164	0	T cells	KPNA5	0.092
0	0.394938	0.73	0.696	0	T cells	ARGLU1	0.034
0	0.389586	0.799	0.684	0	T cells	ANKRD44	0.115
0	0.388151	0.922	0.916	0	T cells	RPS24	0.006
0	0.386074	0.252	0.118	0	T cells	GPR174	0.134
0	0.385039	0.701	0.56	0	T cells	FYN	0.141
0	0.383758	0.984	0.84	0	T cells	PTPRC	0.144
0	0.379431	0.649	0.632	0	T cells	SRSF7	0.017
0	0.372282	0.512	0.418	0	T cells	TMEM131L	0.094
0	0.370096	0.452	0.311	0	T cells	ARL4C	0.141
0	0.366936	0.275	0.123	0	T cells	ZAP70	0.152
0	0.366753	0.3	0.171	0	T cells	SLAMF6	0.129
0	0.361615	0.364	0.257	0	T cells	SP140	0.107
0	0.361479	0.817	0.762	0	T cells	NAP1L1	0.055
0	0.360502	0.671	0.638	0	T cells	EIF3K	0.033
0	0.358621	0.859	0.833	0	T cells	COX4I1	0.026
0	0.35717	0.666	0.661	0	T cells	N4BP2L2	0.005
0	0.356238	0.654	0.571	0	T cells	UBB	0.083
0	0.356037	0.26	0.176	0	T cells	GOLGA8A	0.084
0	0.355828	0.308	0.221	0	T cells	DENND2D	0.087
0	0.354254	0.7	0.655	0	T cells	PARP8	0.045
0	0.345571	0.868	0.858	0	T cells	DDX5	0.01
0	0.341872	0.283	0.194	0	T cells	PPM1K	0.089
0	0.339596	0.359	0.248	0	T cells	RGCC	0.111
0	0.336175	0.417	0.332	0	T cells	RGS10	0.085
0	0.329167	0.632	0.543	0	T cells	IFITM2	0.089
0	0.327082	0.737	0.695	0	T cells	OST4	0.042
0	0.319109	0.722	0.686	0	T cells	FNBP1	0.036
5.79387e-308	0.487358	0.265	0.188	3.51734e-303	T cells	MAF	0.077
1.90753e-298	0.309829	0.338	0.253	1.15802e-293	T cells	BTN3A1	0.085
6.3881e-296	0.303856	0.425	0.338	3.87809e-291	T cells	SPTBN1	0.087
7.49149e-296	0.349576	0.629	0.622	4.54793e-291	T cells	GPBP1	0.007
3.40057e-294	0.375246	0.639	0.632	2.06442e-289	T cells	TPR	0.007
1.04201e-290	0.524384	0.285	0.216	6.32586e-286	T cells	RP11-419I17.1	0.069
3.58713e-288	0.42449	0.407	0.334	2.17768e-283	T cells	H1-3	0.073
2.2933e-281	0.385047	0.596	0.585	1.39222e-276	T cells	KAT6A	0.011
1.27031e-280	0.334534	0.636	0.635	7.7118e-276	T cells	PCM1	0.001
9.85007e-279	0.388989	0.474	0.43	5.97978e-274	T cells	ANAPC16	0.044
9.53333e-276	0.460431	0.584	0.585	5.78749e-271	T cells	VOPP1	-0.001
2.24446e-275	0.330566	0.624	0.613	1.36256e-270	T cells	HNRNPDL	0.011
1.57139e-274	0.305051	0.383	0.303	9.53961e-270	T cells	BTN3A2	0.08
3.49983e-270	0.391651	0.49	0.453	2.12468e-265	T cells	ZRANB2	0.037
1.27717e-266	0.407779	0.524	0.495	7.75343e-262	T cells	CASP8	0.029
1.67e-254	0.426525	0.35	0.289	1.01382e-249	T cells	CCDC18-AS1	0.061
1.40444e-252	0.318231	0.304	0.229	8.52605e-248	T cells	RASGRP2	0.075
2.34378e-243	0.350311	0.26	0.193	1.42286e-238	T cells	CUTALP	0.067
1.77427e-239	0.30937	0.605	0.534	1.07713e-234	T cells	TSC22D3	0.071
1.68859e-230	0.39767	0.318	0.255	1.02511e-225	T cells	PDE7A	0.063
1.96237e-227	0.386165	0.277	0.213	1.19132e-222	T cells	ANKRD36B	0.064
6.85258e-222	0.392797	0.403	0.348	4.16006e-217	T cells	MSI2	0.055
1.01409e-220	0.332864	0.401	0.332	6.15633e-216	T cells	SLC16A7	0.069
2.80333e-220	0.375964	0.309	0.246	1.70184e-215	T cells	PIM1	0.063
6.82475e-219	0.349187	0.302	0.236	4.14317e-214	T cells	JAK3	0.066
1.22e-216	0.325374	0.469	0.413	7.40639e-212	T cells	SEMA4D	0.056
1.01551e-215	0.430467	0.319	0.264	6.16497e-211	T cells	NUCB2	0.055
8.01092e-215	0.497515	0.311	0.265	4.86327e-210	T cells	IL6ST	0.046
1.6624e-208	0.359561	0.34	0.282	1.00921e-203	T cells	OFD1	0.058
8.30623e-206	0.415395	0.369	0.317	5.04254e-201	T cells	RPS6KA5	0.052
1.42052e-203	0.428722	0.327	0.273	8.62368e-199	T cells	SUPT3H	0.054
2.54851e-203	0.368504	0.395	0.335	1.54715e-198	T cells	FUT8	0.06
5.79558e-203	0.377408	0.331	0.28	3.51838e-198	T cells	NPAT	0.051
4.20971e-200	0.378245	0.286	0.23	2.55563e-195	T cells	ZNF107	0.056
4.85122e-194	0.389812	0.44	0.41	2.94508e-189	T cells	CENPC	0.03
1.8428e-192	0.348066	0.532	0.515	1.11873e-187	T cells	CNTRL	0.017
6.34474e-190	0.383791	0.271	0.217	3.85176e-185	T cells	ZC3H6	0.054
2.08744e-189	0.35714	0.466	0.425	1.26724e-184	T cells	GBP2	0.041
4.07641e-189	0.309558	0.542	0.523	2.47471e-184	T cells	RSRP1	0.019
1.74348e-184	0.315265	0.299	0.23	1.05843e-179	T cells	UTY	0.069
1.12337e-179	0.360952	0.434	0.402	6.81978e-175	T cells	UBXN1	0.032
1.62547e-178	0.367292	0.34	0.293	9.86788e-174	T cells	CWF19L2	0.047
1.38378e-170	0.320714	0.362	0.305	8.40063e-166	T cells	ATP8A1	0.057
1.57974e-166	0.333465	0.476	0.457	9.5903e-162	T cells	GTF3A	0.019
1.16758e-162	0.363392	0.258	0.208	7.08815e-158	T cells	KIAA0586	0.05
1.66074e-162	0.316363	0.437	0.404	1.0082e-157	T cells	STIM2	0.033
4.19702e-161	0.34855	0.542	0.533	2.54792e-156	T cells	CCDC91	0.009
2.43955e-157	0.33482	0.326	0.275	1.481e-152	T cells	ZHX2	0.051
1.375e-154	0.333718	0.299	0.249	8.34737e-150	T cells	TMC6	0.05
7.9208e-151	0.328852	0.48	0.458	4.80856e-146	T cells	ERP29	0.022
8.77106e-151	0.312588	0.307	0.262	5.32473e-146	T cells	CRBN	0.045
2.02855e-150	0.35444	0.503	0.501	1.23149e-145	T cells	G3BP2	0.002
1.26697e-148	0.390468	0.414	0.385	7.6915e-144	T cells	KAT2B	0.029
3.87464e-147	0.383549	0.386	0.361	2.35222e-142	T cells	WWP1	0.025
6.36557e-144	0.318825	0.378	0.343	3.86441e-139	T cells	BUB3	0.035
8.09062e-142	0.318147	0.442	0.424	4.91165e-137	T cells	DDX6	0.018
3.29944e-140	0.330361	0.305	0.265	2.00302e-135	T cells	PPWD1	0.04
7.06343e-136	0.312418	0.444	0.424	4.28807e-131	T cells	EIF3G	0.02
2.45065e-129	0.322397	0.26	0.213	1.48774e-124	T cells	LINC02328	0.047
4.08845e-129	0.344557	0.272	0.234	2.48202e-124	T cells	UXS1	0.038
7.1724e-128	0.318346	0.397	0.368	4.35422e-123	T cells	CREBRF	0.029
1.77965e-125	0.323092	0.445	0.436	1.08039e-120	T cells	NSA2	0.009
1.87775e-124	0.326757	0.368	0.336	1.13994e-119	T cells	BICRAL	0.032
6.42334e-122	0.377469	0.758	0.774	3.89948e-117	T cells	JUN	-0.016
1.89047e-117	0.340642	0.321	0.287	1.14766e-112	T cells	CASP8AP2	0.034
2.14652e-116	0.302163	0.299	0.265	1.30311e-111	T cells	CNST	0.034
1.72778e-112	0.30252	0.296	0.259	1.0489e-107	T cells	CFAP97	0.037
1.86362e-112	0.335592	0.467	0.465	1.13137e-107	T cells	SUCLG2	0.002
5.97267e-107	0.330383	0.39	0.375	3.62589e-102	T cells	RWDD1	0.015
2.30282e-101	0.416384	0.369	0.341	1.398e-96	T cells	GLCCI1	0.028
3.8843e-99	0.367364	0.381	0.362	2.35808e-94	T cells	SLC4A7	0.019
9.97174e-88	0.304327	0.364	0.35	6.05364e-83	T cells	TAF1D	0.014
1.73873e-84	0.376261	0.265	0.241	1.05555e-79	T cells	CORO1B	0.024
1.54518e-83	0.30101	0.506	0.521	9.38048e-79	T cells	RICTOR	-0.015
3.44797e-82	0.394904	0.293	0.271	2.0932e-77	T cells	ERN1	0.022
8.48724e-81	0.336392	0.306	0.28	5.15243e-76	T cells	BBS9	0.026
6.59852e-79	0.311622	0.322	0.299	4.00583e-74	T cells	MFSD6	0.023
1.94528e-78	0.319954	0.28	0.251	1.18094e-73	T cells	FOXO1	0.029
6.36493e-73	0.307434	0.546	0.568	3.86402e-68	T cells	RPS6KA3	-0.022
1.39917e-69	0.314106	0.442	0.443	8.4941e-65	T cells	RFX3	-0.001
3.38605e-66	0.304194	0.263	0.239	2.0556e-61	T cells	ZNF37BP	0.024
6.3976e-62	0.306199	0.419	0.421	3.88385e-57	T cells	CRYBG1	-0.002
1.36653e-61	0.327213	0.289	0.27	8.29595e-57	T cells	RUNX2	0.019
2.14543e-55	0.3535	0.273	0.259	1.30245e-50	T cells	MAP3K4	0.014
4.03076e-55	0.423505	0.262	0.346	2.44699e-50	T cells	FAM13A	-0.084
4.89607e-46	0.602583	0.338	0.346	2.97231e-41	T cells	FHIT	-0.008
7.61858e-14	0.313772	0.362	0.381	4.62509e-09	T cells	GPHN	-0.019
0	4.00476	0.797	0.175	0	T_NK cells	GNLY	0.622
0	3.88368	0.967	0.289	0	T_NK cells	NKG7	0.678
0	2.72094	0.751	0.107	0	T_NK cells	KLRD1	0.644
0	2.71915	0.877	0.175	0	T_NK cells	CST7	0.702
0	2.70175	0.858	0.145	0	T_NK cells	GZMA	0.713
0	2.56526	0.653	0.06	0	T_NK cells	FGFBP2	0.593
0	2.5546	0.755	0.11	0	T_NK cells	PRF1	0.645
0	2.48351	0.876	0.239	0	T_NK cells	PYHIN1	0.637
0	2.47938	0.707	0.269	0	T_NK cells	A2M	0.438
0	2.36933	0.718	0.11	0	T_NK cells	CTSW	0.608
0	2.33131	0.592	0.133	0	T_NK cells	PZP	0.459
0	2.12992	0.881	0.39	0	T_NK cells	SYNE1	0.491
0	2.00073	0.737	0.154	0	T_NK cells	SAMD3	0.583
0	1.99047	0.795	0.274	0	T_NK cells	CD247	0.521
0	1.8442	0.377	0.049	0	T_NK cells	KLRF1	0.328
0	1.84214	0.609	0.124	0	T_NK cells	TGFBR3	0.485
0	1.82271	0.856	0.409	0	T_NK cells	IL32	0.447
0	1.73854	0.543	0.074	0	T_NK cells	PPP2R2B	0.469
0	1.69614	0.904	0.507	0	T_NK cells	SYNE2	0.397
0	1.69375	0.583	0.259	0	T_NK cells	THEMIS	0.324
0	1.68696	0.618	0.22	0	T_NK cells	TRG-AS1	0.398
0	1.6744	0.553	0.128	0	T_NK cells	NCALD	0.425
0	1.67407	0.491	0.062	0	T_NK cells	HOPX	0.429
0	1.66738	0.578	0.2	0	T_NK cells	CX3CR1	0.378
0	1.63217	0.62	0.214	0	T_NK cells	TOX	0.406
0	1.62974	0.548	0.147	0	T_NK cells	MYBL1	0.401
0	1.61576	0.765	0.376	0	T_NK cells	PRKCH	0.389
0	1.61113	0.84	0.385	0	T_NK cells	SKAP1	0.455
0	1.60296	0.648	0.254	0	T_NK cells	CD3D	0.394
0	1.58939	0.505	0.046	0	T_NK cells	FCRL6	0.459
0	1.58935	0.702	0.246	0	T_NK cells	STAT4	0.456
0	1.58322	0.413	0.047	0	T_NK cells	PDGFD	0.366
0	1.57678	0.335	0.052	0	T_NK cells	AE000661.37	0.283
0	1.5605	0.409	0.073	0	T_NK cells	CD8A	0.336
0	1.56028	0.794	0.311	0	T_NK cells	CD96	0.483
0	1.54783	0.327	0.032	0	T_NK cells	CTB-91J4.1	0.295
0	1.54302	0.736	0.276	0	T_NK cells	CD2	0.46
0	1.52621	0.693	0.222	0	T_NK cells	IKZF3	0.471
0	1.52167	0.541	0.14	0	T_NK cells	TRBC1	0.401
0	1.49366	0.562	0.092	0	T_NK cells	GZMM	0.47
0	1.48546	0.416	0.072	0	T_NK cells	CLIC3	0.344
0	1.47146	0.588	0.215	0	T_NK cells	CD3G	0.373
0	1.45656	0.594	0.171	0	T_NK cells	CCL4	0.423
0	1.45533	0.504	0.111	0	T_NK cells	C1orf21	0.393
0	1.41958	0.427	0.057	0	T_NK cells	TRGC2	0.37
0	1.41273	0.717	0.33	0	T_NK cells	PLAAT4	0.387
0	1.4001	0.798	0.554	0	T_NK cells	CD52	0.244
0	1.39669	0.594	0.213	0	T_NK cells	RUNX3	0.381
0	1.38457	0.467	0.155	0	T_NK cells	SPON2	0.312
0	1.36763	0.434	0.076	0	T_NK cells	IL2RB	0.358
0	1.3192	0.805	0.421	0	T_NK cells	KLF12	0.384
0	1.31679	0.863	0.62	0	T_NK cells	PARP8	0.243
0	1.30415	0.701	0.389	0	T_NK cells	PTPN4	0.312
0	1.30157	0.45	0.176	0	T_NK cells	CEP78	0.274
0	1.28982	0.403	0.086	0	T_NK cells	ADGRG1	0.317
0	1.2831	0.542	0.16	0	T_NK cells	SLFN12L	0.382
0	1.27593	0.562	0.221	0	T_NK cells	NFATC2	0.341
0	1.27149	0.623	0.272	0	T_NK cells	ARL4C	0.351
0	1.26328	0.979	0.918	0	T_NK cells	HLA-C	0.061
0	1.25795	0.725	0.42	0	T_NK cells	CLEC2D	0.305
0	1.24795	0.627	0.24	0	T_NK cells	CD3E	0.387
0	1.24202	0.492	0.16	0	T_NK cells	APOBEC3G	0.332
0	1.24104	0.502	0.125	0	T_NK cells	SLAMF7	0.377
0	1.22675	0.627	0.242	0	T_NK cells	TRBC2	0.385
0	1.22538	0.733	0.421	0	T_NK cells	SLFN5	0.312
0	1.22425	0.735	0.445	0	T_NK cells	GNG2	0.29
0	1.22303	0.506	0.192	0	T_NK cells	LINC01934	0.314
0	1.22081	0.565	0.215	0	T_NK cells	C12orf75	0.35
0	1.20719	0.375	0.027	0	T_NK cells	S1PR5	0.348
0	1.20584	0.705	0.46	0	T_NK cells	CBLB	0.245
0	1.19757	0.545	0.247	0	T_NK cells	SYTL3	0.298
0	1.18835	0.801	0.529	0	T_NK cells	RAC2	0.272
0	1.18719	0.581	0.221	0	T_NK cells	PRKCQ	0.36
0	1.18138	0.673	0.321	0	T_NK cells	EVL	0.352
0	1.17866	0.336	0.058	0	T_NK cells	LINC00299	0.278
0	1.17823	0.622	0.335	0	T_NK cells	PRKACB	0.287
0	1.17689	0.354	0.048	0	T_NK cells	ADGRG5	0.306
0	1.16631	0.298	0.031	0	T_NK cells	LAIR2	0.267
0	1.16534	0.667	0.359	0	T_NK cells	ITGAL	0.308
0	1.15678	0.479	0.131	0	T_NK cells	SLAMF6	0.348
0	1.15286	0.548	0.193	0	T_NK cells	SCML4	0.355
0	1.15086	0.35	0.079	0	T_NK cells	PRSS23	0.271
0	1.14747	0.296	0.036	0	T_NK cells	DTHD1	0.26
0	1.14619	0.302	0.058	0	T_NK cells	CD8B	0.244
0	1.14158	0.393	0.054	0	T_NK cells	LINC01871	0.339
0	1.14089	0.773	0.584	0	T_NK cells	PPP2R5C	0.189
0	1.13825	0.912	0.797	0	T_NK cells	CALM1	0.115
0	1.12188	0.717	0.511	0	T_NK cells	ARAP2	0.206
0	1.12011	0.763	0.546	0	T_NK cells	UBB	0.217
0	1.11459	0.449	0.161	0	T_NK cells	CD7	0.288
0	1.11371	0.413	0.092	0	T_NK cells	ZAP70	0.321
0	1.10401	0.515	0.176	0	T_NK cells	GRAP2	0.339
0	1.10066	0.542	0.17	0	T_NK cells	LCK	0.372
0	1.09388	0.642	0.379	0	T_NK cells	CCDC88C	0.263
0	1.08979	0.996	0.835	0	T_NK cells	PTPRC	0.161
0	1.08686	0.997	0.994	0	T_NK cells	B2M	0.003
0	1.07713	0.549	0.267	0	T_NK cells	BTN3A2	0.282
0	1.06748	0.82	0.533	0	T_NK cells	FYN	0.287
0	1.05987	0.685	0.476	0	T_NK cells	CCSER2	0.209
0	1.04782	0.444	0.134	0	T_NK cells	GBP5	0.31
0	1.04144	0.632	0.342	0	T_NK cells	TNIK	0.29
0	1.03485	0.774	0.591	0	T_NK cells	PIP4K2A	0.183
0	1.03373	0.696	0.373	0	T_NK cells	GIMAP7	0.323
0	1.02791	0.505	0.271	0	T_NK cells	MCTP2	0.234
0	1.01921	0.839	0.69	0	T_NK cells	MYL12A	0.149
0	1.01226	0.479	0.194	0	T_NK cells	CARD11	0.285
0	1.01058	0.509	0.311	0	T_NK cells	GLCCI1	0.198
0	1.01022	0.295	0.028	0	T_NK cells	PTGDR	0.267
0	1.00403	0.514	0.272	0	T_NK cells	ATP8A1	0.242
0	0.990907	0.485	0.22	0	T_NK cells	BTN3A1	0.265
0	0.981686	0.634	0.271	0	T_NK cells	BCL11B	0.363
0	0.981597	0.509	0.202	0	T_NK cells	RASGRP1	0.307
0	0.979538	0.269	0.048	0	T_NK cells	SLCO4C1	0.221
0	0.971945	0.318	0.073	0	T_NK cells	KLRG1	0.245
0	0.969415	0.667	0.319	0	T_NK cells	ETS1	0.348
0	0.95704	0.296	0.025	0	T_NK cells	TBX21	0.271
0	0.952061	0.297	0.035	0	T_NK cells	MATK	0.262
0	0.947568	0.942	0.836	0	T_NK cells	HLA-E	0.106
0	0.946859	0.78	0.629	0	T_NK cells	MBP	0.151
0	0.940958	0.869	0.776	0	T_NK cells	RABGAP1L	0.093
0	0.928412	0.435	0.166	0	T_NK cells	PARP15	0.269
0	0.926122	0.729	0.485	0	T_NK cells	BIN2	0.244
0	0.925881	0.49	0.192	0	T_NK cells	LBH	0.298
0	0.922655	0.635	0.359	0	T_NK cells	TRAF3IP3	0.276
0	0.920859	0.606	0.391	0	T_NK cells	AKNA	0.215
0	0.916502	0.702	0.478	0	T_NK cells	EMB	0.224
0	0.912377	0.488	0.279	0	T_NK cells	GAB3	0.209
0	0.911432	0.334	0.099	0	T_NK cells	PRR5L	0.235
0	0.911402	0.255	0.079	0	T_NK cells	AF131217.1	0.176
0	0.910792	0.488	0.278	0	T_NK cells	PAXX	0.21
0	0.908646	0.546	0.374	0	T_NK cells	ZBTB38	0.172
0	0.906924	0.537	0.3	0	T_NK cells	STK17A	0.237
0	0.905179	0.468	0.276	0	T_NK cells	TFDP2	0.192
0	0.901954	0.426	0.201	0	T_NK cells	RAB29	0.225
0	0.900976	0.445	0.244	0	T_NK cells	APMAP	0.201
0	0.900885	0.457	0.271	0	T_NK cells	LYAR	0.186
0	0.897755	0.991	0.971	0	T_NK cells	RPS27	0.02
0	0.897467	0.519	0.395	0	T_NK cells	GNPTAB	0.124
0	0.896907	0.388	0.159	0	T_NK cells	SYTL2	0.229
0	0.895569	0.378	0.125	0	T_NK cells	ITM2A	0.253
0	0.891439	0.72	0.59	0	T_NK cells	RESF1	0.13
0	0.890763	0.489	0.244	0	T_NK cells	GVINP1	0.245
0	0.882435	0.533	0.292	0	T_NK cells	TLE5	0.241
0	0.879434	0.785	0.569	0	T_NK cells	IQGAP2	0.216
0	0.876749	0.261	0.065	0	T_NK cells	ABCB1	0.196
0	0.870938	0.319	0.09	0	T_NK cells	CHST12	0.229
0	0.869806	0.37	0.105	0	T_NK cells	SLFN12L.1	0.265
0	0.869088	0.351	0.095	0	T_NK cells	GPR174	0.256
0	0.86778	0.693	0.552	0	T_NK cells	LITAF	0.141
0	0.862966	0.276	0.033	0	T_NK cells	EOMES	0.243
0	0.856803	0.343	0.132	0	T_NK cells	USP28	0.211
0	0.855569	0.535	0.371	0	T_NK cells	NLRC5	0.164
0	0.851893	0.357	0.096	0	T_NK cells	NLRC3	0.261
0	0.851495	0.385	0.151	0	T_NK cells	SIDT1	0.234
0	0.849885	0.537	0.389	0	T_NK cells	RAP1GAP2	0.148
0	0.848932	0.36	0.256	0	T_NK cells	CMC1	0.104
0	0.845836	0.603	0.434	0	T_NK cells	ARHGEF3	0.169
0	0.844999	0.25	0.052	0	T_NK cells	JAKMIP2	0.198
0	0.840263	0.293	0.117	0	T_NK cells	LINC02384	0.176
0	0.8388	0.286	0.086	0	T_NK cells	TTC38	0.2
0	0.829851	0.831	0.737	0	T_NK cells	SEPTIN7	0.094
0	0.826432	0.296	0.171	0	T_NK cells	CD38	0.125
0	0.823354	0.662	0.507	0	T_NK cells	PSMB9	0.155
0	0.821141	0.402	0.183	0	T_NK cells	CD226	0.219
0	0.821126	0.399	0.161	0	T_NK cells	CD6	0.238
0	0.818927	0.856	0.767	0	T_NK cells	JAK1	0.089
0	0.818571	0.925	0.861	0	T_NK cells	TXNIP	0.064
0	0.813905	0.6	0.431	0	T_NK cells	RBL2	0.169
0	0.812826	0.894	0.767	0	T_NK cells	RPL23A	0.127
0	0.81154	0.568	0.431	0	T_NK cells	STK39	0.137
0	0.810878	0.305	0.116	0	T_NK cells	ZFYVE28	0.189
0	0.805144	0.676	0.509	0	T_NK cells	CCND3	0.167
0	0.804224	0.431	0.251	0	T_NK cells	CLEC2B	0.18
0	0.804006	0.778	0.56	0	T_NK cells	ID2	0.218
0	0.801668	0.623	0.492	0	T_NK cells	LNPEP	0.131
0	0.800595	0.444	0.289	0	T_NK cells	DIP2A	0.155
0	0.793533	0.371	0.124	0	T_NK cells	ZNF831	0.247
0	0.793476	0.581	0.435	0	T_NK cells	HIVEP3	0.146
0	0.789481	0.586	0.443	0	T_NK cells	CNOT6L	0.143
0	0.778954	0.59	0.424	0	T_NK cells	RASA3	0.166
0	0.767787	0.445	0.281	0	T_NK cells	TPST2	0.164
0	0.766523	0.263	0.057	0	T_NK cells	F2R	0.206
0	0.764591	0.448	0.237	0	T_NK cells	SP140	0.211
0	0.758215	0.356	0.163	0	T_NK cells	PPP3CC	0.193
0	0.757411	0.806	0.744	0	T_NK cells	PFN1	0.062
0	0.756908	0.594	0.461	0	T_NK cells	INPP4A	0.133
0	0.756523	0.392	0.171	0	T_NK cells	TRAC	0.221
0	0.756049	0.481	0.327	0	T_NK cells	NFATC3	0.154
0	0.755485	0.468	0.359	0	T_NK cells	PAM	0.109
0	0.755059	0.673	0.533	0	T_NK cells	IFITM2	0.14
0	0.749785	0.468	0.316	0	T_NK cells	ARPC5L	0.152
0	0.749615	0.913	0.75	0	T_NK cells	ARHGDIB	0.163
0	0.749561	0.783	0.684	0	T_NK cells	PSME1	0.099
0	0.747066	0.414	0.224	0	T_NK cells	TNRC6C	0.19
0	0.746488	0.376	0.205	0	T_NK cells	DENND2D	0.171
0	0.745217	0.565	0.417	0	T_NK cells	SYNRG	0.148
0	0.743706	0.625	0.43	0	T_NK cells	GIMAP4	0.195
0	0.741886	0.776	0.545	0	T_NK cells	AOAH	0.231
0	0.738772	0.42	0.236	0	T_NK cells	OPTN	0.184
0	0.738465	0.531	0.379	0	T_NK cells	ATP2B4	0.152
0	0.737334	0.705	0.456	0	T_NK cells	SLC38A1	0.249
0	0.736899	0.314	0.187	0	T_NK cells	TXK	0.127
0	0.733724	0.297	0.143	0	T_NK cells	SETBP1	0.154
0	0.730985	0.341	0.223	0	T_NK cells	RFX3-AS1	0.118
0	0.726881	0.721	0.637	0	T_NK cells	RASA2	0.084
0	0.724651	0.516	0.38	0	T_NK cells	MAPRE2	0.136
0	0.724068	0.55	0.412	0	T_NK cells	ATM	0.138
0	0.722323	0.54	0.417	0	T_NK cells	PLAC8	0.123
0	0.720455	0.467	0.301	0	T_NK cells	ANXA6	0.166
0	0.720323	0.735	0.587	0	T_NK cells	CORO1A	0.148
0	0.719665	0.283	0.118	0	T_NK cells	TSPAN5	0.165
0	0.718038	0.561	0.456	0	T_NK cells	PRMT2	0.105
0	0.717105	0.453	0.312	0	T_NK cells	PSMB10	0.141
0	0.713053	0.614	0.484	0	T_NK cells	EFHD2	0.13
0	0.710302	0.261	0.115	0	T_NK cells	OSBPL5	0.146
0	0.709575	0.714	0.595	0	T_NK cells	LRBA	0.119
0	0.709558	0.799	0.618	0	T_NK cells	IKZF1	0.181
0	0.709146	0.332	0.147	0	T_NK cells	RASAL3	0.185
0	0.706919	0.359	0.166	0	T_NK cells	CYFIP2	0.193
0	0.706615	0.594	0.48	0	T_NK cells	CASP8	0.114
0	0.70653	0.336	0.183	0	T_NK cells	SLC9A3R1	0.153
0	0.703076	0.254	0.081	0	T_NK cells	AC006369.2	0.173
0	0.701299	0.976	0.935	0	T_NK cells	RPS29	0.041
0	0.699093	0.545	0.439	0	T_NK cells	PPP1CA	0.106
0	0.698793	0.446	0.375	0	T_NK cells	ZNF91	0.071
0	0.696748	0.296	0.133	0	T_NK cells	ABHD17A	0.163
0	0.696178	0.725	0.624	0	T_NK cells	ARL6IP5	0.101
0	0.690748	0.88	0.744	0	T_NK cells	UTRN	0.136
0	0.673693	0.332	0.151	0	T_NK cells	PPP1R16B	0.181
0	0.672822	0.529	0.342	0	T_NK cells	PCED1B	0.187
0	0.672521	0.623	0.497	0	T_NK cells	PITPNC1	0.126
0	0.668735	0.503	0.389	0	T_NK cells	STIM2	0.114
0	0.667623	0.273	0.109	0	T_NK cells	TSEN54	0.164
0	0.663455	0.438	0.187	0	T_NK cells	ITK	0.251
0	0.662977	0.485	0.369	0	T_NK cells	KAT2B	0.116
0	0.661484	0.545	0.425	0	T_NK cells	ST6GAL1	0.12
0	0.658958	0.279	0.13	0	T_NK cells	RRAS2	0.149
0	0.658817	0.706	0.511	0	T_NK cells	ITGA4	0.195
0	0.65839	0.449	0.263	0	T_NK cells	ISG20	0.186
0	0.657631	0.891	0.755	0	T_NK cells	CELF2	0.136
0	0.654659	0.568	0.476	0	T_NK cells	DNAJC1	0.092
0	0.653606	0.502	0.309	0	T_NK cells	CD69	0.193
0	0.649046	0.321	0.183	0	T_NK cells	MLLT6	0.138
0	0.649014	0.981	0.953	0	T_NK cells	RPS3	0.028
0	0.647289	0.692	0.614	0	T_NK cells	ITGB1	0.078
0	0.646092	0.301	0.118	0	T_NK cells	S1PR1	0.183
0	0.641947	0.382	0.275	0	T_NK cells	TMEM181	0.107
0	0.640799	0.843	0.673	0	T_NK cells	ANKRD44	0.17
0	0.635701	0.78	0.683	0	T_NK cells	RNF213	0.097
0	0.632009	0.493	0.362	0	T_NK cells	ANKRD36	0.131
0	0.630966	0.311	0.18	0	T_NK cells	SP4	0.131
0	0.626115	0.269	0.15	0	T_NK cells	KIF21A	0.119
0	0.624228	0.638	0.508	0	T_NK cells	EPB41	0.13
0	0.620926	0.284	0.158	0	T_NK cells	RASSF1	0.126
0	0.620772	0.331	0.232	0	T_NK cells	AMZ2	0.099
0	0.619592	0.398	0.234	0	T_NK cells	ACAP1	0.164
0	0.616907	0.322	0.214	0	T_NK cells	PLEKHA1	0.108
0	0.615479	0.26	0.099	0	T_NK cells	UTS2	0.161
0	0.613576	0.976	0.948	0	T_NK cells	RPL27A	0.028
0	0.613429	0.675	0.615	0	T_NK cells	ADD3	0.06
0	0.610474	0.749	0.641	0	T_NK cells	RPS15A	0.108
0	0.608138	0.733	0.541	0	T_NK cells	PLEK	0.192
0	0.606756	0.268	0.128	0	T_NK cells	PRKY	0.14
0	0.605933	0.351	0.267	0	T_NK cells	SSBP3	0.084
0	0.605506	0.639	0.515	0	T_NK cells	CTSC	0.124
0	0.601977	0.547	0.452	0	T_NK cells	MPHOSPH8	0.095
0	0.600153	0.99	0.961	0	T_NK cells	RPL13A	0.029
0	0.599052	0.304	0.225	0	T_NK cells	LINC01278	0.079
0	0.596258	0.514	0.466	0	T_NK cells	DNAJB14	0.048
0	0.594567	0.458	0.366	0	T_NK cells	TRERF1	0.092
0	0.594022	0.344	0.218	0	T_NK cells	TMC8	0.126
0	0.591469	0.307	0.176	0	T_NK cells	ABI3	0.131
0	0.589654	0.623	0.532	0	T_NK cells	AAK1	0.091
0	0.589206	0.287	0.204	0	T_NK cells	GK5	0.083
0	0.588422	0.416	0.253	0	T_NK cells	GYPC	0.163
0	0.587586	0.748	0.703	0	T_NK cells	BPTF	0.045
0	0.581671	0.504	0.42	0	T_NK cells	JAZF1	0.084
0	0.580486	0.989	0.97	0	T_NK cells	RPS19	0.019
0	0.579427	0.365	0.29	0	T_NK cells	MFSD6	0.075
0	0.578315	0.742	0.667	0	T_NK cells	STK4	0.075
0	0.576827	0.272	0.103	0	T_NK cells	LY9	0.169
0	0.576644	0.29	0.185	0	T_NK cells	PATL2	0.105
0	0.57455	0.789	0.716	0	T_NK cells	RAP1B	0.073
0	0.573245	0.707	0.604	0	T_NK cells	EEF1D	0.103
0	0.572471	0.33	0.261	0	T_NK cells	MIR4435-2HG	0.069
0	0.571168	0.681	0.548	0	T_NK cells	NOP53	0.133
0	0.570601	0.317	0.216	0	T_NK cells	RNF167	0.101
0	0.570302	0.399	0.324	0	T_NK cells	HERPUD2	0.075
0	0.570003	0.974	0.941	0	T_NK cells	RPL3	0.033
0	0.5691	0.511	0.404	0	T_NK cells	RAB27A	0.107
0	0.567843	0.341	0.231	0	T_NK cells	GPR65	0.11
0	0.56427	0.784	0.717	0	T_NK cells	RPL36AL	0.067
0	0.562346	0.461	0.423	0	T_NK cells	TCF25	0.038
0	0.559063	0.855	0.784	0	T_NK cells	PNRC1	0.071
0	0.557949	0.719	0.685	0	T_NK cells	ATRX	0.034
0	0.557388	0.556	0.472	0	T_NK cells	FLNA	0.084
0	0.551914	0.271	0.143	0	T_NK cells	LINC00869	0.128
0	0.551878	0.52	0.434	0	T_NK cells	APOL6	0.086
0	0.550496	0.773	0.675	0	T_NK cells	FNBP1	0.098
0	0.548708	0.511	0.415	0	T_NK cells	GBP2	0.096
0	0.547275	0.332	0.26	0	T_NK cells	TGFBR1	0.072
0	0.546414	0.671	0.617	0	T_NK cells	ATF7IP	0.054
0	0.545478	0.443	0.36	0	T_NK cells	PPP1R18	0.083
0	0.544762	0.272	0.165	0	T_NK cells	LINC01145	0.107
0	0.543267	1	0.997	0	T_NK cells	MALAT1	0.003
0	0.543042	0.305	0.202	0	T_NK cells	GBP4	0.103
0	0.542134	0.573	0.506	0	T_NK cells	STK38	0.067
0	0.541757	0.59	0.528	0	T_NK cells	PIK3R1	0.062
0	0.540334	0.311	0.228	0	T_NK cells	AGPAT4	0.083
0	0.539822	0.432	0.321	0	T_NK cells	SELPLG	0.111
0	0.539229	0.302	0.186	0	T_NK cells	TRANK1	0.116
0	0.534965	0.252	0.129	0	T_NK cells	SYTL1	0.123
0	0.526755	0.419	0.321	0	T_NK cells	SFMBT2	0.098
0	0.525088	0.39	0.322	0	T_NK cells	AKT3	0.068
0	0.524358	0.732	0.622	0	T_NK cells	MSN	0.11
0	0.52373	0.895	0.799	0	T_NK cells	S100A4	0.096
0	0.521947	0.959	0.941	0	T_NK cells	RPL41	0.018
0	0.520557	0.893	0.818	0	T_NK cells	CYBA	0.075
0	0.519356	0.36	0.277	0	T_NK cells	OFD1	0.083
0	0.519208	0.494	0.414	0	T_NK cells	KLF13	0.08
0	0.518324	0.94	0.89	0	T_NK cells	SH3BGRL3	0.05
0	0.515664	0.748	0.624	0	T_NK cells	CD53	0.124
0	0.510921	0.257	0.158	0	T_NK cells	CTD-2201E18.8	0.099
0	0.51058	0.778	0.721	0	T_NK cells	SRSF5	0.057
0	0.509565	0.365	0.282	0	T_NK cells	ARNTL	0.083
0	0.508771	0.471	0.417	0	T_NK cells	DDX6	0.054
0	0.508537	0.617	0.506	0	T_NK cells	INPP5D	0.111
0	0.5071	0.814	0.804	0	T_NK cells	RPS26	0.01
0	0.50565	0.336	0.249	0	T_NK cells	CCDC85B	0.087
0	0.505419	0.732	0.684	0	T_NK cells	IFI16	0.048
0	0.505041	0.303	0.23	0	T_NK cells	KIFAP3	0.073
0	0.50491	0.377	0.3	0	T_NK cells	ODF2L	0.077
0	0.504737	0.662	0.637	0	T_NK cells	XRN1	0.025
0	0.504239	0.257	0.161	0	T_NK cells	CRACR2A	0.096
0	0.503504	0.732	0.687	0	T_NK cells	CDC42SE2	0.045
0	0.503171	0.424	0.326	0	T_NK cells	SLC16A7	0.098
0	0.499712	0.593	0.57	0	T_NK cells	KIAA1109	0.023
0	0.499707	0.816	0.585	0	T_NK cells	RIPOR2	0.231
0	0.49896	0.482	0.386	0	T_NK cells	CEP85L	0.096
0	0.498939	0.409	0.335	0	T_NK cells	BUB3	0.074
0	0.498114	0.515	0.482	0	T_NK cells	PRPF38B	0.033
0	0.497307	0.656	0.63	0	T_NK cells	PCM1	0.026
0	0.496525	0.575	0.526	0	T_NK cells	TRIR	0.049
0	0.496029	0.966	0.931	0	T_NK cells	RPL21	0.035
0	0.496019	0.509	0.447	0	T_NK cells	TUT4	0.062
0	0.495905	0.689	0.665	0	T_NK cells	PPP1R12A	0.024
0	0.49577	0.283	0.207	0	T_NK cells	LINC02328	0.076
0	0.495514	0.766	0.736	0	T_NK cells	MACF1	0.03
0	0.495489	0.921	0.876	0	T_NK cells	FAU	0.045
0	0.492504	0.739	0.693	0	T_NK cells	ARGLU1	0.046
0	0.490676	0.879	0.855	0	T_NK cells	DDX5	0.024
0	0.488439	0.459	0.36	0	T_NK cells	CXCR4	0.099
0	0.487109	0.531	0.502	0	T_NK cells	PTPRA	0.029
0	0.48675	0.382	0.32	0	T_NK cells	ZMYND11	0.062
0	0.486173	0.41	0.338	0	T_NK cells	ARHGEF1	0.072
0	0.484468	0.995	0.992	0	T_NK cells	TMSB4X	0.003
0	0.484276	0.564	0.534	0	T_NK cells	GCC2	0.03
0	0.482331	0.49	0.45	0	T_NK cells	RNF19A	0.04
0	0.480481	0.294	0.213	0	T_NK cells	LPIN1	0.081
0	0.47918	0.639	0.607	0	T_NK cells	FAM172A	0.032
0	0.478465	0.338	0.221	0	T_NK cells	UTY	0.117
0	0.474169	0.477	0.423	0	T_NK cells	CIRBP	0.054
0	0.472613	0.383	0.261	0	T_NK cells	MLLT3	0.122
0	0.47207	0.868	0.808	0	T_NK cells	HLA-A	0.06
0	0.471957	0.678	0.612	0	T_NK cells	SNRPD2	0.066
0	0.468004	0.64	0.613	0	T_NK cells	NCOA1	0.027
0	0.467582	0.483	0.423	0	T_NK cells	MGAT4A	0.06
0	0.467437	0.727	0.588	0	T_NK cells	ARHGAP15	0.139
0	0.463953	0.419	0.259	0	T_NK cells	RHOH	0.16
0	0.462745	0.599	0.588	0	T_NK cells	HERC1	0.011
0	0.461613	0.558	0.519	0	T_NK cells	RSRP1	0.039
0	0.459104	0.359	0.181	0	T_NK cells	FCMR	0.178
0	0.458847	0.509	0.458	0	T_NK cells	IGF2R	0.051
0	0.457923	0.558	0.467	0	T_NK cells	ARHGAP25	0.091
0	0.457674	0.327	0.24	0	T_NK cells	PTP4A2	0.087
0	0.455748	0.567	0.541	0	T_NK cells	OGA	0.026
0	0.455543	0.556	0.534	0	T_NK cells	KDM5A	0.022
0	0.455001	0.547	0.445	0	T_NK cells	SEPTIN6	0.102
0	0.454215	0.967	0.935	0	T_NK cells	RPS15	0.032
0	0.453471	0.323	0.24	0	T_NK cells	SASH3	0.083
0	0.450097	0.262	0.176	0	T_NK cells	DENND1C	0.086
0	0.449733	0.43	0.36	0	T_NK cells	SAMD9L	0.07
0	0.448946	0.28	0.191	0	T_NK cells	LINC01138	0.089
0	0.447263	0.61	0.575	0	T_NK cells	CFLAR	0.035
0	0.445144	0.883	0.845	0	T_NK cells	ARPC2	0.038
0	0.438022	0.984	0.974	0	T_NK cells	RPL10	0.01
0	0.437891	0.484	0.409	0	T_NK cells	SEMA4D	0.075
0	0.435311	0.731	0.715	0	T_NK cells	KMT2E	0.016
0	0.432017	0.707	0.672	0	T_NK cells	COMMD6	0.035
0	0.426401	0.952	0.922	0	T_NK cells	RPL14	0.03
0	0.423713	0.636	0.617	0	T_NK cells	SON	0.019
0	0.423476	0.801	0.766	0	T_NK cells	HMGB1	0.035
0	0.417289	0.648	0.613	0	T_NK cells	DIAPH1	0.035
0	0.416598	0.68	0.661	0	T_NK cells	PNISR	0.019
0	0.416103	0.953	0.917	0	T_NK cells	RPS25	0.036
0	0.411101	0.973	0.95	0	T_NK cells	RPS27A	0.023
0	0.410729	0.752	0.705	0	T_NK cells	TOMM7	0.047
0	0.410088	0.737	0.705	0	T_NK cells	TNRC6B	0.032
0	0.408071	0.758	0.678	0	T_NK cells	SH3KBP1	0.08
0	0.407008	0.953	0.931	0	T_NK cells	RPS7	0.022
0	0.401845	0.698	0.676	0	T_NK cells	HP1BP3	0.022
0	0.401303	0.373	0.242	0	T_NK cells	SPOCK2	0.131
0	0.396523	0.623	0.613	0	T_NK cells	HNRNPDL	0.01
0	0.393805	0.709	0.699	0	T_NK cells	SP100	0.01
0	0.390948	0.666	0.661	0	T_NK cells	N4BP2L2	0.005
0	0.390311	0.95	0.921	0	T_NK cells	RPL6	0.029
0	0.390053	0.533	0.39	0	T_NK cells	TC2N	0.143
0	0.389716	0.62	0.565	0	T_NK cells	ZFP36L2	0.055
0	0.388801	0.963	0.942	0	T_NK cells	RPL37A	0.021
0	0.386071	0.62	0.624	0	T_NK cells	SF3B1	-0.004
0	0.382832	0.828	0.809	0	T_NK cells	RBM39	0.019
0	0.380467	0.96	0.94	0	T_NK cells	RPL37	0.02
0	0.379807	0.978	0.964	0	T_NK cells	RPS14	0.014
0	0.378203	0.641	0.633	0	T_NK cells	SRSF7	0.008
0	0.376773	0.514	0.45	0	T_NK cells	DOCK11	0.064
0	0.371719	0.918	0.866	0	T_NK cells	RPL30	0.052
0	0.36739	0.98	0.959	0	T_NK cells	RPS12	0.021
0	0.366402	0.684	0.684	0	T_NK cells	SRSF11	0
0	0.364187	0.944	0.909	0	T_NK cells	RPL27	0.035
0	0.357426	0.956	0.932	0	T_NK cells	RPL35	0.024
0	0.349887	0.955	0.913	0	T_NK cells	HLA-B	0.042
0	0.349474	0.921	0.873	0	T_NK cells	RPL29	0.048
0	0.347518	0.287	0.206	0	T_NK cells	TUBA4A	0.081
0	0.346524	0.752	0.712	0	T_NK cells	MYL12B	0.04
0	0.344561	0.978	0.967	0	T_NK cells	RPLP2	0.011
0	0.340509	0.973	0.956	0	T_NK cells	RPL31	0.017
0	0.338572	0.734	0.71	0	T_NK cells	CLIC1	0.024
0	0.3382	0.975	0.954	0	T_NK cells	RPL19	0.021
0	0.329341	0.576	0.513	0	T_NK cells	H4C3	0.063
0	0.328804	0.956	0.938	0	T_NK cells	RPS28	0.018
0	0.323747	0.715	0.554	0	T_NK cells	MYO1F	0.161
0	0.321196	0.956	0.939	0	T_NK cells	RPL34	0.017
0	0.318151	0.908	0.876	0	T_NK cells	MBNL1	0.032
0	0.315414	0.981	0.968	0	T_NK cells	RPL28	0.013
0	0.312754	0.892	0.838	0	T_NK cells	RPS23	0.054
0	0.312682	0.911	0.759	0	T_NK cells	FYB1	0.152
0	0.31203	0.926	0.903	0	T_NK cells	RPL7A	0.023
0	0.310777	0.749	0.735	0	T_NK cells	SRP14	0.014
0	0.308151	0.949	0.918	0	T_NK cells	RPS11	0.031
0	0.301455	0.962	0.955	0	T_NK cells	RPS2	0.007
3.31545e-305	0.398109	0.51	0.451	2.01274e-300	T_NK cells	ARHGAP30	0.059
4.60541e-304	0.365748	0.252	0.179	2.79585e-299	T_NK cells	GOLGA8B	0.073
1.83161e-302	0.449547	0.275	0.208	1.11193e-297	T_NK cells	SIGIRR	0.067
2.28267e-302	0.458818	0.446	0.407	1.38576e-297	T_NK cells	TRAPPC10	0.039
1.00317e-293	0.4588	0.535	0.525	6.09004e-289	T_NK cells	MAN1A2	0.01
1.13254e-293	0.396937	0.315	0.251	6.8754e-289	T_NK cells	STOM	0.064
3.73647e-292	0.45493	0.533	0.523	2.26834e-287	T_NK cells	USP47	0.01
1.97581e-290	0.339564	0.719	0.706	1.19947e-285	T_NK cells	ZBTB20	0.013
4.76459e-290	0.436168	0.32	0.259	2.89249e-285	T_NK cells	CRBN	0.061
8.91729e-288	0.416134	0.468	0.43	5.41351e-283	T_NK cells	URI1	0.038
1.69101e-285	0.455814	0.462	0.433	1.02658e-280	T_NK cells	LBR	0.029
6.06001e-285	0.466852	0.288	0.224	3.67891e-280	T_NK cells	LPCAT1	0.064
3.81553e-282	0.458441	0.306	0.239	2.31633e-277	T_NK cells	CCDC7	0.067
2.25427e-280	0.413513	0.488	0.461	1.36852e-275	T_NK cells	DDX24	0.027
1.40189e-279	0.402768	0.511	0.46	8.51059e-275	T_NK cells	NIBAN1	0.051
9.91338e-278	0.349285	0.633	0.633	6.01821e-273	T_NK cells	TPR	0
1.25442e-276	0.382784	0.592	0.57	7.61536e-272	T_NK cells	SRPK2	0.022
1.63397e-273	0.379627	0.271	0.202	9.9195e-269	T_NK cells	GIMAP2	0.069
4.34985e-272	0.461688	0.502	0.493	2.6407e-267	T_NK cells	USP24	0.009
2.3728e-270	0.382976	0.539	0.519	1.44048e-265	T_NK cells	GUK1	0.02
1.88229e-267	0.380388	0.266	0.196	1.1427e-262	T_NK cells	PPM1K	0.07
2.40096e-264	0.395489	0.321	0.259	1.45757e-259	T_NK cells	YPEL3	0.062
1.27435e-263	0.459571	0.456	0.425	7.73629e-259	T_NK cells	CDK17	0.031
6.28091e-263	0.349883	0.598	0.593	3.81301e-258	T_NK cells	ZC3HAV1	0.005
2.35366e-260	0.377044	0.587	0.584	1.42886e-255	T_NK cells	VOPP1	0.003
1.72747e-259	0.386275	0.263	0.202	1.04871e-254	T_NK cells	GOLGA7	0.061
1.79879e-257	0.431542	0.457	0.43	1.09201e-252	T_NK cells	TAF7	0.027
4.88345e-257	0.450983	0.405	0.359	2.96464e-252	T_NK cells	DDHD1	0.046
6.57219e-256	0.395721	0.52	0.506	3.98985e-251	T_NK cells	SMARCA2	0.014
7.91491e-253	0.311156	0.561	0.528	4.80498e-248	T_NK cells	SUMO2	0.033
1.82126e-252	0.376001	0.524	0.503	1.10565e-247	T_NK cells	YWHAQ	0.021
3.57577e-251	0.352849	0.265	0.199	2.17078e-246	T_NK cells	CDC42EP3	0.066
7.44917e-249	0.422845	0.438	0.391	4.52224e-244	T_NK cells	SAMD9	0.047
2.43385e-247	0.438924	0.26	0.202	1.47754e-242	T_NK cells	TTC13	0.058
2.88353e-244	0.434732	0.443	0.418	1.75054e-239	T_NK cells	IK	0.025
6.91533e-243	0.340706	0.533	0.513	4.19816e-238	T_NK cells	EIF3F	0.02
6.53808e-242	0.379317	0.254	0.193	3.96914e-237	T_NK cells	CUTALP	0.061
3.47631e-240	0.376576	0.561	0.561	2.1104e-235	T_NK cells	RSF1	0
3.55328e-238	0.337442	0.626	0.628	2.15712e-233	T_NK cells	AKAP9	-0.002
4.85136e-238	0.412728	0.474	0.456	2.94516e-233	T_NK cells	ZRANB2	0.018
1.59328e-237	0.437752	0.388	0.349	9.6725e-233	T_NK cells	DCAF5	0.039
3.22555e-237	0.406701	0.274	0.218	1.95817e-232	T_NK cells	RECQL	0.056
9.56719e-235	0.35971	0.531	0.485	5.80805e-230	T_NK cells	PLCL2	0.046
5.02772e-231	0.436259	0.369	0.32	3.05223e-226	T_NK cells	VPS13A	0.049
9.90749e-231	0.345498	0.555	0.553	6.01464e-226	T_NK cells	TMEM50A	0.002
3.64081e-229	0.442352	0.398	0.359	2.21026e-224	T_NK cells	SLC4A7	0.039
3.36681e-227	0.401787	0.574	0.589	2.04392e-222	T_NK cells	ANKRD12	-0.015
7.17558e-225	0.394926	0.327	0.27	4.35615e-220	T_NK cells	DOK2	0.057
4.12893e-221	0.395544	0.357	0.3	2.50659e-216	T_NK cells	MYO1G	0.057
6.88079e-220	0.440179	0.583	0.59	4.17719e-215	T_NK cells	MBD5	-0.007
9.2236e-220	0.44497	0.347	0.306	5.59947e-215	T_NK cells	TERF2IP	0.041
2.17662e-219	0.378937	0.453	0.427	1.32138e-214	T_NK cells	NAP1L4	0.026
2.7573e-219	0.383157	0.475	0.457	1.6739e-214	T_NK cells	GTF3A	0.018
1.05058e-216	0.42526	0.377	0.342	6.37784e-212	T_NK cells	MAT2B	0.035
1.53825e-215	0.40931	0.47	0.452	9.33841e-211	T_NK cells	OGT	0.018
7.00103e-214	0.415287	0.472	0.459	4.25019e-209	T_NK cells	PSMB8	0.013
5.99031e-212	0.426479	0.381	0.349	3.6366e-207	T_NK cells	PRPF4B	0.032
7.68642e-212	0.366078	0.485	0.468	4.66627e-207	T_NK cells	TRAPPC1	0.017
6.54282e-211	0.441283	0.542	0.521	3.97202e-206	T_NK cells	SMYD3	0.021
7.81406e-210	0.411379	0.463	0.444	4.74376e-205	T_NK cells	CLK1	0.019
1.09942e-209	0.451694	0.433	0.416	6.67435e-205	T_NK cells	KIAA2026	0.017
3.43166e-209	0.388581	0.543	0.539	2.08329e-204	T_NK cells	SOS1	0.004
5.20271e-207	0.30467	0.524	0.503	3.15846e-202	T_NK cells	SNHG6	0.021
4.48776e-204	0.390665	0.523	0.518	2.72443e-199	T_NK cells	RICTOR	0.005
1.77617e-203	0.311051	0.497	0.476	1.07828e-198	T_NK cells	ATP5IF1	0.021
2.20603e-202	0.402734	0.54	0.533	1.33924e-197	T_NK cells	CCDC91	0.007
2.26979e-202	0.400744	0.307	0.256	1.37794e-197	T_NK cells	FAM214A	0.051
7.60399e-202	0.412211	0.325	0.279	4.61623e-197	T_NK cells	HLA-F	0.046
8.22717e-201	0.424721	0.422	0.402	4.99455e-196	T_NK cells	XBP1	0.02
2.66355e-200	0.422132	0.431	0.411	1.61699e-195	T_NK cells	CENPC	0.02
2.6487e-198	0.426817	0.477	0.478	1.60797e-193	T_NK cells	ZC3H13	-0.001
4.43959e-196	0.335512	0.578	0.593	2.69518e-191	T_NK cells	NCOR1	-0.015
6.4428e-195	0.42923	0.44	0.424	3.91129e-190	T_NK cells	EIF3G	0.016
2.50677e-190	0.387868	0.475	0.467	1.52181e-185	T_NK cells	ZNF800	0.008
2.1062e-188	0.416685	0.532	0.532	1.27863e-183	T_NK cells	FBXL17	0
3.67662e-188	0.470301	0.295	0.257	2.232e-183	T_NK cells	CDC16	0.038
4.69949e-186	0.348153	0.535	0.542	2.85297e-181	T_NK cells	FUS	-0.007
1.35647e-178	0.366235	0.453	0.436	8.23489e-174	T_NK cells	DRAP1	0.017
6.21999e-173	0.339709	0.573	0.587	3.77603e-168	T_NK cells	EPS15	-0.014
1.11312e-172	0.300245	0.606	0.627	6.7575e-168	T_NK cells	GPBP1	-0.021
1.07671e-170	0.308717	0.515	0.496	6.53648e-166	T_NK cells	CAPN2	0.019
3.94647e-170	0.43592	0.252	0.206	2.39582e-165	T_NK cells	CRY1	0.046
3.21117e-160	0.397963	0.427	0.416	1.94944e-155	T_NK cells	OSTF1	0.011
1.59578e-159	0.425693	0.451	0.436	9.68769e-155	T_NK cells	STXBP5	0.015
2.76579e-158	0.331275	0.565	0.575	1.67906e-153	T_NK cells	ATP11B	-0.01
7.30722e-157	0.335405	0.522	0.536	4.43607e-152	T_NK cells	MIER1	-0.014
6.20938e-156	0.367797	0.295	0.259	3.76959e-151	T_NK cells	MED10	0.036
1.92244e-152	0.364045	0.462	0.458	1.16708e-147	T_NK cells	EPC1	0.004
1.48201e-149	0.399437	0.382	0.36	8.99697e-145	T_NK cells	MYLIP	0.022
6.32099e-148	0.328061	0.256	0.209	3.83735e-143	T_NK cells	RFTN1	0.047
2.39999e-145	0.351593	0.442	0.433	1.45699e-140	T_NK cells	NDUFB7	0.009
1.48628e-143	0.433447	0.278	0.24	9.02291e-139	T_NK cells	CD300A	0.038
2.43326e-143	0.386258	0.282	0.24	1.47718e-138	T_NK cells	ARHGAP10	0.042
7.72189e-143	0.350084	0.362	0.338	4.68781e-138	T_NK cells	KRT10	0.024
9.58524e-143	0.363022	0.395	0.377	5.81901e-138	T_NK cells	UHMK1	0.018
2.62872e-141	0.417097	0.47	0.467	1.59585e-136	T_NK cells	H1-4	0.003
4.3373e-141	0.315276	0.554	0.576	2.63309e-136	T_NK cells	LUC7L3	-0.022
9.06209e-140	0.397579	0.4	0.388	5.50142e-135	T_NK cells	UBR1	0.012
3.73436e-139	0.415768	0.378	0.363	2.26706e-134	T_NK cells	MAP4K5	0.015
1.2873e-137	0.36045	0.511	0.523	7.81492e-133	T_NK cells	BDP1	-0.012
8.53216e-137	0.309351	0.521	0.522	5.17971e-132	T_NK cells	DBI	-0.001
2.87279e-135	0.303085	0.576	0.599	1.74401e-130	T_NK cells	HELZ	-0.023
5.45304e-135	0.414095	0.336	0.313	3.31043e-130	T_NK cells	AEBP2	0.023
1.16322e-134	0.325756	0.515	0.524	7.06167e-130	T_NK cells	UBR2	-0.009
2.08945e-133	0.348081	0.294	0.259	1.26846e-128	T_NK cells	CFAP97	0.035
3.92156e-133	0.305282	0.277	0.234	2.3807e-128	T_NK cells	RASGRP2	0.043
4.81927e-132	0.336944	0.378	0.347	2.92568e-127	T_NK cells	STAT5B	0.031
1.75018e-130	0.373956	0.36	0.332	1.0625e-125	T_NK cells	OSBPL3	0.028
8.95895e-129	0.335936	0.489	0.5	5.4388e-124	T_NK cells	SF3B2	-0.011
4.30499e-128	0.333676	0.439	0.437	2.61347e-123	T_NK cells	ANAPC16	0.002
5.18505e-126	0.36283	0.291	0.258	3.14774e-121	T_NK cells	DGKZ	0.033
1.29502e-125	0.377646	0.376	0.365	7.86179e-121	T_NK cells	RSBN1L	0.011
1.35123e-125	0.355733	0.42	0.41	8.20304e-121	T_NK cells	TOP2B	0.01
2.63896e-125	0.36888	0.323	0.296	1.60206e-120	T_NK cells	CWF19L2	0.027
3.00156e-124	0.318769	0.524	0.547	1.82218e-119	T_NK cells	YTHDC1	-0.023
6.73626e-121	0.358882	0.285	0.251	4.08945e-116	T_NK cells	TMC6	0.034
1.17011e-119	0.380465	0.319	0.294	7.10352e-115	T_NK cells	NUP210	0.025
1.55451e-117	0.361506	0.25	0.217	9.4371e-113	T_NK cells	SIRT2	0.033
2.53789e-117	0.324819	0.372	0.341	1.5407e-112	T_NK cells	H1-3	0.031
1.42674e-116	0.33624	0.466	0.476	8.66143e-112	T_NK cells	DDX46	-0.01
4.47782e-115	0.38811	0.45	0.45	2.7184e-110	T_NK cells	RFX7	0
1.37103e-114	0.361124	0.289	0.262	8.32326e-110	T_NK cells	IDH2	0.027
7.36866e-114	0.374786	0.405	0.402	4.47337e-109	T_NK cells	PPP1R10	0.003
1.69065e-113	0.35599	0.309	0.284	1.02636e-108	T_NK cells	TERF1	0.025
6.24232e-109	0.315726	0.446	0.454	3.78959e-104	T_NK cells	PNRC2	-0.008
2.59342e-106	0.375036	0.316	0.295	1.57442e-101	T_NK cells	RNASEH2B	0.021
2.81492e-105	0.326851	0.293	0.262	1.70888e-100	T_NK cells	DEF6	0.031
5.96791e-105	0.362362	0.382	0.377	3.623e-100	T_NK cells	RWDD1	0.005
4.59692e-103	0.354747	0.41	0.415	2.7907e-98	T_NK cells	VPS4B	-0.005
5.36878e-102	0.343331	0.463	0.472	3.25928e-97	T_NK cells	SCP2	-0.009
2.0868e-101	0.317479	0.449	0.454	1.26685e-96	T_NK cells	NDUFA3	-0.005
1.07773e-100	0.417177	0.304	0.28	6.5427e-96	T_NK cells	BBS9	0.024
5.53924e-100	0.334088	0.321	0.3	3.36276e-95	T_NK cells	KMT2A	0.021
4.90275e-99	0.372225	0.437	0.444	2.97636e-94	T_NK cells	KAT6B	-0.007
3.78584e-97	0.354065	0.306	0.288	2.29831e-92	T_NK cells	C9orf78	0.018
3.2397e-96	0.319226	0.457	0.463	1.96676e-91	T_NK cells	NDUFB2	-0.006
3.61286e-95	0.34506	0.455	0.465	2.1933e-90	T_NK cells	DENND1B	-0.01
3.33231e-93	0.476259	0.387	0.396	2.02298e-88	T_NK cells	RPTOR	-0.009
1.08306e-91	0.343991	0.296	0.276	6.57501e-87	T_NK cells	NUB1	0.02
1.29943e-90	0.335035	0.46	0.479	7.88857e-86	T_NK cells	PPP2R5E	-0.019
2.27636e-90	0.335872	0.429	0.439	1.38193e-85	T_NK cells	DNAJC8	-0.01
1.21323e-89	0.340361	0.354	0.345	7.36528e-85	T_NK cells	PPP2R5A	0.009
1.22293e-89	0.335055	0.43	0.443	7.42415e-85	T_NK cells	DHX36	-0.013
1.42189e-88	0.303051	0.442	0.431	8.63203e-84	T_NK cells	STIM1	0.011
1.01211e-87	0.320791	0.289	0.265	6.1443e-83	T_NK cells	SNRK	0.024
1.98812e-87	0.340931	0.319	0.307	1.20695e-82	T_NK cells	POLR2G	0.012
1.14033e-85	0.316113	0.403	0.396	6.92274e-81	T_NK cells	DGKD	0.007
1.39744e-83	0.301996	0.292	0.269	8.4836e-79	T_NK cells	NUCB2	0.023
1.65116e-81	0.320472	0.412	0.413	1.00239e-76	T_NK cells	SENP7	-0.001
2.77704e-81	0.344174	0.294	0.279	1.68589e-76	T_NK cells	IRAK4	0.015
3.28914e-81	0.394579	0.328	0.32	1.99677e-76	T_NK cells	RPAP2	0.008
3.95202e-78	0.325487	0.346	0.343	2.39919e-73	T_NK cells	TBCB	0.003
2.79552e-77	0.341616	0.266	0.248	1.69711e-72	T_NK cells	STK26	0.018
3.49039e-77	0.323174	0.251	0.227	2.11895e-72	T_NK cells	NPC1	0.024
5.88188e-76	0.368425	0.26	0.24	3.57077e-71	T_NK cells	ZNF37BP	0.02
8.9076e-76	0.358361	0.322	0.312	5.40762e-71	T_NK cells	CDK2AP2	0.01
1.11649e-73	0.378359	0.275	0.26	6.77799e-69	T_NK cells	AUH	0.015
6.73046e-73	0.337294	0.33	0.323	4.08593e-68	T_NK cells	CDC42SE1	0.007
2.1474e-72	0.31114	0.283	0.262	1.30365e-67	T_NK cells	PDE7A	0.021
1.30098e-71	0.340839	0.383	0.389	7.89798e-67	T_NK cells	SMC3	-0.006
4.59692e-71	0.30899	0.351	0.343	2.7907e-66	T_NK cells	PDCD4	0.008
2.12121e-69	0.336093	0.415	0.42	1.28774e-64	T_NK cells	CEMIP2	-0.005
4.92737e-69	0.311636	0.375	0.373	2.99131e-64	T_NK cells	CREBRF	0.002
8.15452e-69	0.333507	0.293	0.281	4.95044e-64	T_NK cells	USF3	0.012
3.00427e-68	0.39443	0.273	0.264	1.82383e-63	T_NK cells	STARD3NL	0.009
4.62222e-68	0.345763	0.338	0.34	2.80606e-63	T_NK cells	ARIH2	-0.002
5.43695e-68	0.339228	0.328	0.325	3.30067e-63	T_NK cells	CSNK1G3	0.003
1.94833e-66	0.301927	0.483	0.514	1.18279e-61	T_NK cells	VPS13C	-0.031
4.19732e-66	0.325506	0.347	0.346	2.54811e-61	T_NK cells	UBE2L6	0.001
4.84502e-65	0.300349	0.28	0.267	2.94131e-60	T_NK cells	ELK4	0.013
2.57652e-63	0.341072	0.355	0.362	1.56415e-58	T_NK cells	MIA2	-0.007
7.98974e-63	0.327088	0.266	0.251	4.85041e-58	T_NK cells	DBF4	0.015
8.50818e-63	0.302234	0.255	0.236	5.16515e-58	T_NK cells	ZNF107	0.019
1.68305e-62	0.346342	0.268	0.257	1.02175e-57	T_NK cells	SACM1L	0.011
3.04752e-62	0.343522	0.329	0.328	1.85009e-57	T_NK cells	ATE1	0.001
1.20388e-61	0.352133	0.319	0.309	7.30849e-57	T_NK cells	GTDC1	0.01
3.51136e-52	0.346042	0.444	0.473	2.13167e-47	T_NK cells	RAP1GDS1	-0.029
4.01932e-51	0.302305	0.482	0.52	2.44005e-46	T_NK cells	GPATCH8	-0.038
6.78246e-51	0.35154	0.276	0.272	4.1175e-46	T_NK cells	UBLCP1	0.004
6.43808e-48	0.313538	0.272	0.267	3.90843e-43	T_NK cells	UPF3A	0.005
2.10331e-47	0.394742	0.265	0.258	1.27688e-42	T_NK cells	CEP290	0.007
3.49292e-46	0.347353	0.416	0.442	2.12048e-41	T_NK cells	UBL3	-0.026
4.30059e-44	0.304706	0.353	0.368	2.6108e-39	T_NK cells	TBRG1	-0.015
8.08479e-44	0.310035	0.304	0.305	4.90812e-39	T_NK cells	EXOC2	-0.001
5.71145e-41	0.319486	0.313	0.32	3.46731e-36	T_NK cells	RO60	-0.007
1.53116e-40	0.341515	0.355	0.372	9.29536e-36	T_NK cells	CCDC186	-0.017
6.64821e-40	0.320629	0.305	0.311	4.03599e-35	T_NK cells	SNRNP200	-0.006
2.11573e-38	0.305565	0.328	0.339	1.28442e-33	T_NK cells	FGFR1OP2	-0.011
1.08831e-36	0.320618	0.297	0.301	6.60689e-32	T_NK cells	EMSY	-0.004
9.79051e-34	0.310382	0.352	0.366	5.94363e-29	T_NK cells	BAX	-0.014
1.89634e-33	0.322288	0.267	0.266	1.15123e-28	T_NK cells	TDRD3	0.001
1.94991e-27	0.307334	0.296	0.3	1.18375e-22	T_NK cells	PCNX2	-0.004
2.07531e-24	0.303925	0.274	0.281	1.25988e-19	T_NK cells	GSE1	-0.007
5.20245e-21	0.30245	0.273	0.284	3.1583e-16	T_NK cells	CCDC82	-0.011
1.40055e-18	0.300439	0.362	0.395	8.50248e-14	T_NK cells	MED15	-0.033
4.0375e-18	0.303573	0.347	0.376	2.45108e-13	T_NK cells	YAF2	-0.029
4.46652e-08	0.346334	0.321	0.344	0.00271154	T_NK cells	PPM1L	-0.023
0	4.32515	0.963	0.142	0	B cells	BANK1	0.821
0	4.1132	0.946	0.045	0	B cells	MS4A1	0.901
0	3.66364	0.934	0.181	0	B cells	AFF3	0.753
0	3.43168	0.821	0.027	0	B cells	FCRL1	0.794
0	3.36077	0.851	0.223	0	B cells	BACH2	0.628
0	3.35074	0.768	0.057	0	B cells	IGHM	0.711
0	3.27556	0.892	0.024	0	B cells	CD79A	0.868
0	3.00264	0.659	0.018	0	B cells	COL19A1	0.641
0	2.92846	0.86	0.201	0	B cells	RALGPS2	0.659
0	2.80261	0.762	0.025	0	B cells	PAX5	0.737
0	2.78563	0.717	0.045	0	B cells	EBF1	0.672
0	2.687	0.771	0.021	0	B cells	LINC00926	0.75
0	2.52503	0.618	0.078	0	B cells	KHDRBS2	0.54
0	2.27497	0.625	0.021	0	B cells	NIBAN3	0.604
0	2.20399	0.564	0.023	0	B cells	IGHD	0.541
0	2.1968	0.585	0.005	0	B cells	VPREB3	0.58
0	2.16673	0.619	0.02	0	B cells	CD22	0.599
0	2.06545	0.569	0.015	0	B cells	BLK	0.554
0	2.03079	0.807	0.338	0	B cells	MEF2C	0.469
0	2.02682	0.339	0.016	0	B cells	PCDH9	0.323
0	2.00214	0.661	0.131	0	B cells	BCL11A	0.53
0	1.99129	0.595	0.113	0	B cells	OSBPL10	0.482
0	1.97386	0.796	0.2	0	B cells	FCMR	0.596
0	1.84687	0.604	0.082	0	B cells	GNG7	0.522
0	1.81623	0.578	0.14	0	B cells	COBLL1	0.438
0	1.76967	0.999	0.889	0	B cells	CD74	0.11
0	1.75775	0.724	0.274	0	B cells	SWAP70	0.45
0	1.72985	0.872	0.318	0	B cells	LTB	0.554
0	1.72126	0.532	0.094	0	B cells	PLEKHG1	0.438
0	1.71277	0.787	0.369	0	B cells	CXCR4	0.418
0	1.7085	0.631	0.2	0	B cells	STRBP	0.431
0	1.65551	0.855	0.33	0	B cells	HLA-DQA1	0.525
0	1.64633	0.429	0.126	0	B cells	CPED1	0.303
0	1.62353	0.5	0.036	0	B cells	STAP1	0.464
0	1.60495	0.702	0.266	0	B cells	SP140	0.436
0	1.57586	0.599	0.206	0	B cells	SEL1L3	0.393
0	1.57219	0.673	0.325	0	B cells	CDK14	0.348
0	1.5679	0.41	0.041	0	B cells	BTLA	0.369
0	1.53826	0.564	0.335	0	B cells	CCSER1	0.229
0	1.53211	0.417	0.008	0	B cells	FCRL2	0.409
0	1.50904	0.991	0.686	0	B cells	HLA-DRA	0.305
0	1.49458	0.692	0.372	0	B cells	STX7	0.32
0	1.49245	0.771	0.551	0	B cells	ZCCHC7	0.22
0	1.48667	0.622	0.226	0	B cells	TCF4	0.396
0	1.47837	0.82	0.551	0	B cells	FCHSD2	0.269
0	1.47716	0.418	0.039	0	B cells	C12orf42	0.379
0	1.46509	0.779	0.291	0	B cells	HLA-DQB1	0.488
0	1.46391	0.509	0.121	0	B cells	RUBCNL	0.388
0	1.45682	0.55	0.162	0	B cells	SETBP1	0.388
0	1.45573	0.525	0.136	0	B cells	TMEM156	0.389
0	1.43858	0.449	0.076	0	B cells	HVCN1	0.373
0	1.42655	0.484	0.069	0	B cells	BLNK	0.415
0	1.42397	0.752	0.44	0	B cells	ST6GAL1	0.312
0	1.42305	0.366	0.008	0	B cells	FCER2	0.358
0	1.41388	0.414	0.154	0	B cells	RP13-188A5.1	0.26
0	1.38365	0.41	0.135	0	B cells	KCNQ5	0.275
0	1.34506	0.521	0.153	0	B cells	PALM2AKAP2	0.368
0	1.34099	0.415	0.091	0	B cells	DENND5B	0.324
0	1.33487	0.84	0.5	0	B cells	MARCHF1	0.34
0	1.32591	0.348	0.086	0	B cells	IFNG-AS1	0.262
0	1.32141	0.552	0.272	0	B cells	ITPR1	0.28
0	1.31677	0.291	0.039	0	B cells	MEF2C-AS1	0.252
0	1.30018	0.264	0.029	0	B cells	LIX1-AS1	0.235
0	1.292	0.573	0.206	0	B cells	PARP15	0.367
0	1.28458	0.974	0.845	0	B cells	RPS23	0.129
0	1.27292	0.713	0.297	0	B cells	IKZF3	0.416
0	1.26737	0.451	0.154	0	B cells	EAF2	0.297
0	1.26256	0.333	0.097	0	B cells	LARGE1	0.236
0	1.25908	0.707	0.445	0	B cells	SNX2	0.262
0	1.25445	0.383	0.007	0	B cells	TNFRSF13C	0.376
0	1.22741	0.53	0.202	0	B cells	PPM1K	0.328
0	1.21938	0.619	0.301	0	B cells	PLCG2	0.318
0	1.20849	0.403	0.142	0	B cells	MARCHF3	0.261
0	1.20263	0.988	0.922	0	B cells	RPS11	0.066
0	1.19281	0.989	0.937	0	B cells	RPL18A	0.052
0	1.18591	0.629	0.416	0	B cells	MGAT5	0.213
0	1.17292	0.973	0.858	0	B cells	RPS5	0.115
0	1.17088	0.369	0.019	0	B cells	POU2AF1	0.35
0	1.16955	0.706	0.487	0	B cells	SP110	0.219
0	1.152	0.334	0.005	0	B cells	FCRLA	0.329
0	1.11987	0.432	0.1	0	B cells	P2RY10	0.332
0	1.11492	0.496	0.277	0	B cells	IRAG2	0.219
0	1.10041	0.324	0.014	0	B cells	CNR2	0.31
0	1.09382	0.403	0.199	0	B cells	CHPT1	0.204
0	1.07938	0.616	0.426	0	B cells	LMBRD1	0.19
0	1.07938	0.992	0.956	0	B cells	RPS8	0.036
0	1.07836	0.995	0.974	0	B cells	RPS27	0.021
0	1.06501	0.62	0.383	0	B cells	ARHGEF18	0.237
0	1.0625	0.995	0.966	0	B cells	RPL13A	0.029
0	1.06045	0.477	0.178	0	B cells	WDFY4	0.299
0	1.05607	0.995	0.969	0	B cells	RPLP2	0.026
0	1.05523	0.507	0.278	0	B cells	SMC6	0.229
0	1.0552	0.686	0.487	0	B cells	ARID5B	0.199
0	1.05021	0.35	0.089	0	B cells	RASGRP3	0.261
0	1.04475	0.936	0.618	0	B cells	HLA-DPA1	0.318
0	1.0434	0.957	0.839	0	B cells	RPS3A	0.118
0	1.04219	0.454	0.235	0	B cells	ZNF107	0.219
0	1.02192	0.572	0.323	0	B cells	GGA2	0.249
0	1.01795	0.511	0.249	0	B cells	TMEM154	0.262
0	1.01658	0.956	0.786	0	B cells	RPL23A	0.17
0	1.00704	0.392	0.158	0	B cells	SLC9A7	0.234
0	1.00663	0.25	0.074	0	B cells	LL22NC03-2H8.5	0.176
0	1.00124	0.58	0.29	0	B cells	ISG20	0.29
0	0.998821	0.253	0.007	0	B cells	FAM30A	0.246
0	0.991811	0.975	0.873	0	B cells	RPL30	0.102
0	0.984309	0.288	0.064	0	B cells	IGLC2	0.224
0	0.982957	0.906	0.591	0	B cells	CD52	0.315
0	0.979761	0.994	0.973	0	B cells	RPS19	0.021
0	0.977759	0.658	0.491	0	B cells	PRDM2	0.167
0	0.973317	0.996	0.968	0	B cells	RPL13	0.028
0	0.969315	0.272	0.046	0	B cells	BCL7A	0.226
0	0.967782	0.255	0.048	0	B cells	FCRL3	0.207
0	0.963691	0.36	0.127	0	B cells	QRSL1	0.233
0	0.963069	0.982	0.909	0	B cells	RPL18	0.073
0	0.955586	0.581	0.281	0	B cells	RHOH	0.3
0	0.949991	0.99	0.936	0	B cells	RPL21	0.054
0	0.946691	0.432	0.167	0	B cells	ADAM19	0.265
0	0.941303	0.668	0.362	0	B cells	POU2F2	0.306
0	0.940532	0.404	0.151	0	B cells	RRAS2	0.253
0	0.935134	0.319	0.101	0	B cells	TPD52	0.218
0	0.928246	0.709	0.469	0	B cells	CLEC2D	0.24
0	0.927766	0.988	0.941	0	B cells	RPL34	0.047
0	0.914254	0.991	0.942	0	B cells	RPS29	0.049
0	0.91085	0.302	0.055	0	B cells	PKIG	0.247
0	0.90745	0.318	0.079	0	B cells	CD40	0.239
0	0.903311	0.255	0.009	0	B cells	CD79B	0.246
0	0.894677	0.344	0.141	0	B cells	CYSLTR1	0.203
0	0.894164	0.83	0.698	0	B cells	SP100	0.132
0	0.894084	0.368	0.142	0	B cells	GAPT	0.226
0	0.886376	0.936	0.828	0	B cells	RPL39	0.108
0	0.885103	0.983	0.937	0	B cells	RPL8	0.046
0	0.88444	0.99	0.95	0	B cells	RPL12	0.04
0	0.880166	0.969	0.88	0	B cells	RPL29	0.089
0	0.875802	0.987	0.922	0	B cells	RPS25	0.065
0	0.875608	0.974	0.882	0	B cells	FAU	0.092
0	0.8748	0.796	0.574	0	B cells	LAPTM5	0.222
0	0.873814	0.856	0.662	0	B cells	PRKCB	0.194
0	0.865068	0.99	0.954	0	B cells	RPL11	0.036
0	0.864343	0.894	0.755	0	B cells	EEF1B2	0.139
0	0.863962	0.985	0.943	0	B cells	RPL37	0.042
0	0.863788	0.989	0.953	0	B cells	RPS27A	0.036
0	0.863253	0.987	0.943	0	B cells	RPL41	0.044
0	0.854106	0.807	0.662	0	B cells	PNISR	0.145
0	0.853912	0.401	0.169	0	B cells	IRF8	0.232
0	0.852531	0.975	0.906	0	B cells	RPL10A	0.069
0	0.844655	0.793	0.567	0	B cells	NOP53	0.226
0	0.844293	0.269	0.072	0	B cells	CD72	0.197
0	0.842408	0.292	0.081	0	B cells	CDCA7L	0.211
0	0.842238	0.374	0.14	0	B cells	TRAF5	0.234
0	0.840082	0.283	0.052	0	B cells	LINC01215	0.231
0	0.834943	0.881	0.7	0	B cells	ANKRD44	0.181
0	0.827351	0.94	0.658	0	B cells	HLA-DRB1	0.282
0	0.825395	0.986	0.941	0	B cells	RPS13	0.045
0	0.817796	0.979	0.914	0	B cells	RPL27	0.065
0	0.816965	0.991	0.957	0	B cells	RPL19	0.034
0	0.816629	0.961	0.873	0	B cells	RPL23	0.088
0	0.806	0.252	0.036	0	B cells	RAB30	0.216
0	0.805678	0.421	0.142	0	B cells	CCR7	0.279
0	0.805383	0.286	0.096	0	B cells	MICAL3	0.19
0	0.803087	0.994	0.969	0	B cells	RPS6	0.025
0	0.794375	0.376	0.168	0	B cells	CXXC5	0.208
0	0.792258	0.99	0.961	0	B cells	MT-ND3	0.029
0	0.783117	0.941	0.859	0	B cells	RPL9	0.082
0	0.781975	0.982	0.92	0	B cells	RPS21	0.062
0	0.777468	0.987	0.949	0	B cells	RPS20	0.038
0	0.777393	0.265	0.093	0	B cells	KMO	0.172
0	0.77152	0.985	0.922	0	B cells	RPL36	0.063
0	0.760681	0.724	0.447	0	B cells	HLA-DPB1	0.277
0	0.760117	0.989	0.952	0	B cells	RPL27A	0.037
0	0.755429	0.988	0.94	0	B cells	RPS28	0.048
0	0.752666	0.336	0.136	0	B cells	BIRC3	0.2
0	0.747772	0.986	0.94	0	B cells	RPS15	0.046
0	0.745971	0.985	0.936	0	B cells	RPL35	0.049
0	0.745345	0.964	0.884	0	B cells	RPSA	0.08
0	0.742295	0.987	0.945	0	B cells	RPL37A	0.042
0	0.739457	0.976	0.907	0	B cells	RPL38	0.069
0	0.729899	0.993	0.981	0	B cells	RPS18	0.012
0	0.723755	0.992	0.962	0	B cells	RPS12	0.03
0	0.718434	0.867	0.621	0	B cells	RIPOR2	0.246
0	0.717858	0.96	0.892	0	B cells	RACK1	0.068
0	0.715636	0.411	0.151	0	B cells	CD24	0.26
0	0.702283	0.989	0.958	0	B cells	RPL31	0.031
0	0.698567	0.984	0.955	0	B cells	RPS16	0.029
0	0.690091	0.253	0.057	0	B cells	HLA-DOA	0.196
0	0.673055	0.369	0.154	0	B cells	PDLIM1	0.215
0	0.670489	0.993	0.976	0	B cells	RPL10	0.017
0	0.668779	0.98	0.934	0	B cells	RPS7	0.046
0	0.656439	0.256	0.083	0	B cells	SHISAL2A	0.173
0	0.651173	0.984	0.946	0	B cells	RPL3	0.038
0	0.650331	0.965	0.906	0	B cells	RPL7A	0.059
0	0.574049	0.994	0.986	0	B cells	RPLP1	0.008
0	0.561986	0.987	0.956	0	B cells	RPS2	0.031
0	0.557822	0.991	0.97	0	B cells	RPL28	0.021
0	0.553004	0.997	0.984	0	B cells	EEF1A1	0.013
0	0.505078	0.97	0.926	0	B cells	RPL14	0.044
0	0.469556	0.99	0.966	0	B cells	RPS14	0.024
0	0.453462	0.988	0.957	0	B cells	RPS3	0.031
7.69314e-304	1.11305	0.758	0.617	4.67035e-299	B cells	ADK	0.141
4.32547e-294	0.655159	0.666	0.416	2.62591e-289	B cells	HLA-DRB5	0.25
3.48615e-293	1.19024	0.698	0.559	2.11637e-288	B cells	CAMK2D	0.139
1.2717e-291	0.890157	0.512	0.294	7.72023e-287	B cells	DAPP1	0.218
2.03395e-291	0.696478	0.487	0.24	1.23477e-286	B cells	LBH	0.247
5.50182e-289	0.518576	0.944	0.872	3.34004e-284	B cells	RPL24	0.072
4.31489e-288	0.869052	0.712	0.558	2.61948e-283	B cells	UVRAG	0.154
1.33346e-283	1.06609	0.49	0.273	8.09517e-279	B cells	AUTS2	0.217
1.18782e-278	0.744178	0.806	0.638	7.21103e-274	B cells	SMAP2	0.168
4.55483e-275	0.871718	0.508	0.276	2.76515e-270	B cells	ZEB1	0.232
2.25716e-267	0.400595	0.998	0.992	1.37028e-262	B cells	MT-ND4L	0.006
5.32429e-262	0.531104	0.982	0.943	3.23227e-257	B cells	RPS9	0.039
8.49198e-261	0.906131	0.346	0.165	5.15531e-256	B cells	ZNF318	0.181
2.14213e-257	0.949108	0.551	0.372	1.30044e-252	B cells	DMXL1	0.179
6.65487e-256	1.00113	0.417	0.229	4.04004e-251	B cells	ZNF92	0.188
2.88872e-253	0.962389	0.496	0.307	1.75369e-248	B cells	PLEKHA2	0.189
9.48379e-251	0.742591	0.814	0.706	5.75742e-246	B cells	ZBTB20	0.108
3.79816e-250	0.92713	0.347	0.169	2.30579e-245	B cells	AGPAT5	0.178
2.00487e-249	0.715342	0.382	0.179	1.21712e-244	B cells	PPP1R16B	0.203
9.68099e-249	0.801674	0.452	0.255	5.87714e-244	B cells	CHD7	0.197
4.20181e-246	0.675507	0.809	0.708	2.55084e-241	B cells	TNRC6B	0.101
1.93802e-245	0.585142	0.835	0.729	1.17653e-240	B cells	SRSF5	0.106
2.36687e-245	0.689032	0.326	0.147	1.43688e-240	B cells	CIITA	0.179
1.61865e-243	0.744943	0.713	0.495	9.82647e-239	B cells	SLC38A1	0.218
1.32875e-242	0.895794	0.603	0.396	8.06658e-238	B cells	RCSD1	0.207
7.38726e-241	0.811973	0.365	0.187	4.48466e-236	B cells	PLEKHF2	0.178
1.80337e-240	0.83344	0.38	0.199	1.09479e-235	B cells	CCDC50	0.181
6.90925e-239	0.676793	0.524	0.295	4.19447e-234	B cells	MTSS1	0.229
1.98293e-236	0.455211	0.954	0.899	1.2038e-231	B cells	RPL7	0.055
2.15355e-236	0.85242	0.561	0.334	1.30737e-231	B cells	ARHGAP24	0.227
2.82645e-235	0.937566	0.366	0.183	1.71588e-230	B cells	DIPK1A	0.183
1.11468e-234	0.680285	0.619	0.396	6.76697e-230	B cells	BCL2	0.223
1.47884e-232	0.549821	0.859	0.77	8.97775e-228	B cells	NAP1L1	0.089
1.19578e-231	0.741031	0.926	0.871	7.25932e-227	B cells	TXNIP	0.055
2.03167e-228	0.57045	0.871	0.795	1.23339e-223	B cells	PNRC1	0.076
2.81361e-228	0.729249	0.324	0.148	1.70809e-223	B cells	UST	0.176
3.27735e-228	0.648257	0.269	0.112	1.98961e-223	B cells	CD180	0.157
4.29758e-228	0.780077	0.31	0.143	2.60897e-223	B cells	C11orf80	0.167
1.59443e-225	0.728842	0.627	0.43	9.67945e-221	B cells	TMEM131L	0.197
3.38083e-224	0.941526	0.492	0.309	2.05244e-219	B cells	SIPA1L3	0.183
8.54992e-224	0.838098	0.595	0.433	5.19048e-219	B cells	WASHC4	0.162
1.64233e-222	0.719479	0.307	0.14	9.97025e-218	B cells	TLE1	0.167
3.67333e-218	0.599964	0.774	0.609	2.23001e-213	B cells	ARHGAP15	0.165
9.32842e-218	0.603439	0.774	0.619	5.6631e-213	B cells	EEF1D	0.155
1.51739e-216	0.789541	0.66	0.53	9.21177e-212	B cells	SEC62	0.13
3.73961e-216	0.773879	0.473	0.28	2.27024e-211	B cells	ZHX2	0.193
4.44325e-216	1.02793	0.364	0.198	2.69741e-211	B cells	TAPT1	0.166
1.12941e-214	0.853022	0.443	0.262	6.85645e-210	B cells	PDE7A	0.181
4.8975e-214	0.791657	0.384	0.211	2.97318e-209	B cells	USP6NL	0.173
7.08169e-211	0.797273	0.647	0.483	4.29915e-206	B cells	CAMK1D	0.164
7.54792e-211	0.96183	0.539	0.371	4.58219e-206	B cells	PRKCE	0.168
1.34527e-205	0.434848	0.968	0.925	8.16685e-201	B cells	RPLP0	0.043
2.7109e-205	0.608776	0.279	0.125	1.64573e-200	B cells	HHEX	0.154
1.84125e-203	0.711414	0.531	0.338	1.11779e-198	B cells	STK17A	0.193
2.41521e-202	0.632038	0.264	0.117	1.46623e-197	B cells	SMIM14	0.147
3.8006e-198	0.788679	0.485	0.322	2.30727e-193	B cells	CSNK1G3	0.163
2.43421e-197	0.841385	0.452	0.293	1.47776e-192	B cells	DRAM2	0.159
2.62699e-195	0.376277	0.973	0.925	1.5948e-190	B cells	RPL6	0.048
4.04709e-192	0.616342	0.289	0.13	2.45691e-187	B cells	LY9	0.159
2.63479e-191	0.798046	0.431	0.262	1.59953e-186	B cells	FAM214A	0.169
1.77689e-190	0.524142	0.818	0.704	1.07871e-185	B cells	HINT1	0.114
9.10516e-188	0.732951	0.397	0.231	5.52756e-183	B cells	KIAA0040	0.166
1.80646e-187	1.20568	0.39	0.24	1.09667e-182	B cells	IL4R	0.15
7.01392e-187	0.651359	0.292	0.14	4.25801e-182	B cells	SNX25	0.152
3.13624e-186	0.786629	0.426	0.265	1.90395e-181	B cells	EBLN3P	0.161
1.28629e-185	0.38733	0.946	0.903	7.80883e-181	B cells	RPL4	0.043
4.05916e-185	0.656049	0.329	0.173	2.46423e-180	B cells	NUP88	0.156
5.36313e-184	0.825666	0.528	0.339	3.25585e-179	B cells	CD69	0.189
1.91889e-181	0.653322	0.284	0.135	1.16492e-176	B cells	TSPAN13	0.149
2.34223e-181	0.821703	0.392	0.233	1.42192e-176	B cells	IFT57	0.159
1.751e-179	0.660399	0.736	0.627	1.063e-174	B cells	BTG1	0.109
1.22218e-178	0.568989	0.433	0.24	7.41959e-174	B cells	CARD11	0.193
2.70442e-174	0.725249	0.407	0.245	1.6418e-169	B cells	FOXP1	0.162
3.23655e-174	0.623981	0.624	0.46	1.96485e-169	B cells	SEPTIN6	0.164
3.59532e-174	0.740202	0.624	0.496	2.18265e-169	B cells	RB1	0.128
3.89205e-174	0.62842	0.412	0.238	2.36278e-169	B cells	RASGRP2	0.174
9.00161e-174	0.563831	0.622	0.435	5.4647e-169	B cells	PLAC8	0.187
7.50023e-172	0.588333	0.253	0.117	4.55324e-167	B cells	ORAI2	0.136
1.17886e-170	0.739457	0.552	0.406	7.15662e-166	B cells	STIM2	0.146
8.42105e-167	0.912128	0.441	0.292	5.11225e-162	B cells	RHBDD1	0.149
1.52398e-165	0.735749	0.538	0.398	9.25175e-161	B cells	ELOVL5	0.14
8.74104e-165	0.659707	0.574	0.434	5.30651e-160	B cells	SMCHD1	0.14
3.79158e-164	0.493927	0.713	0.566	2.30179e-159	B cells	GAS5	0.147
1.41307e-163	0.57573	0.271	0.13	8.57845e-159	B cells	CD37	0.141
1.00529e-162	0.652133	0.699	0.579	6.10292e-158	B cells	EZR	0.12
1.6105e-158	0.613902	0.664	0.472	9.777e-154	B cells	SYK	0.192
2.22664e-158	0.721091	0.54	0.394	1.35175e-153	B cells	DGKD	0.146
2.58145e-158	0.703462	0.357	0.209	1.56715e-153	B cells	ZDHHC21	0.148
1.35528e-156	0.628743	0.665	0.532	8.22766e-152	B cells	REL	0.133
1.22422e-155	0.685661	0.34	0.192	7.43201e-151	B cells	FAM3C	0.148
4.31826e-155	0.660871	0.588	0.456	2.62153e-150	B cells	TUT4	0.132
1.699e-154	0.780446	0.449	0.299	1.03143e-149	B cells	FAM117B	0.15
1.01576e-152	0.348151	0.989	0.976	6.16646e-148	B cells	PTMA	0.013
4.55677e-152	0.87622	0.437	0.296	2.76632e-147	B cells	TBC1D9	0.141
7.09684e-150	0.467806	0.799	0.712	4.30835e-145	B cells	TOMM7	0.087
4.39427e-148	0.820065	0.533	0.393	2.66767e-143	B cells	SNX29	0.14
3.00313e-145	0.529844	0.352	0.19	1.82314e-140	B cells	SLAMF6	0.162
7.87938e-145	0.626012	0.515	0.371	4.78341e-140	B cells	PARP1	0.144
1.46834e-143	0.631847	0.656	0.547	8.91401e-139	B cells	NCOA3	0.109
1.46839e-141	0.343401	0.401	0.245	8.91433e-137	B cells	TMEM243	0.156
2.73925e-140	0.561378	0.286	0.148	1.66294e-135	B cells	ATP2A3	0.138
2.77549e-137	0.71512	0.644	0.553	1.68494e-132	B cells	PACS1	0.091
2.25318e-136	0.744271	0.412	0.283	1.36786e-131	B cells	DNAJC10	0.129
6.48623e-136	0.647574	0.334	0.2	3.93766e-131	B cells	AIDA	0.134
5.17611e-134	0.651442	0.575	0.472	3.14232e-129	B cells	MDM4	0.103
2.77954e-133	0.667764	0.479	0.351	1.6874e-128	B cells	SP140L	0.128
3.08288e-133	0.517275	0.258	0.133	1.87155e-128	B cells	BTK	0.125
3.36001e-133	0.533863	0.341	0.19	2.03979e-128	B cells	SIDT1	0.151
4.15255e-129	0.365924	0.936	0.916	2.52093e-124	B cells	RPS24	0.02
1.56453e-127	0.669926	0.436	0.305	9.49792e-123	B cells	RABEP1	0.131
5.23957e-127	0.53397	0.282	0.154	3.18084e-122	B cells	HSH2D	0.128
2.84514e-126	0.597464	0.62	0.516	1.72723e-121	B cells	CNTRL	0.104
6.95314e-126	0.484187	0.751	0.677	4.22111e-121	B cells	COMMD6	0.074
5.10974e-125	0.512125	0.761	0.658	3.10202e-120	B cells	RPS15A	0.103
1.93783e-122	0.840109	0.343	0.214	1.17642e-117	B cells	RP11-96H19.1	0.129
2.05839e-122	0.570539	0.676	0.543	1.24961e-117	B cells	TSC22D3	0.133
2.35685e-122	0.596676	0.321	0.19	1.43079e-117	B cells	LY86	0.131
1.29821e-121	0.552323	0.692	0.63	7.8812e-117	B cells	ITSN2	0.062
1.81718e-121	0.545832	0.305	0.176	1.10318e-116	B cells	HLA-DMB	0.129
2.1075e-121	0.543144	0.275	0.153	1.27942e-116	B cells	SNHG7	0.122
1.99198e-120	0.69288	0.677	0.626	1.20929e-115	B cells	ATF7IP	0.051
4.8067e-119	0.587789	0.273	0.155	2.91805e-114	B cells	TMED8	0.118
1.96101e-118	0.623775	0.251	0.135	1.19049e-113	B cells	GABPB1-AS1	0.116
2.12031e-117	0.564075	0.588	0.465	1.2872e-112	B cells	MAP3K1	0.123
1.00996e-115	0.649927	0.283	0.161	6.13126e-111	B cells	EFCAB13	0.122
7.42689e-115	0.441602	0.756	0.7	4.50871e-110	B cells	ARGLU1	0.056
3.72019e-114	0.546989	0.647	0.543	2.25845e-109	B cells	TNFAIP8	0.104
4.98054e-114	0.587328	0.422	0.289	3.02358e-109	B cells	OFD1	0.133
3.69856e-113	0.774233	0.511	0.4	2.24532e-108	B cells	SSBP2	0.111
5.89856e-112	0.688922	0.27	0.151	3.5809e-107	B cells	LINC01588	0.119
1.61843e-111	0.606555	0.423	0.296	9.82518e-107	B cells	CCDC18-AS1	0.127
3.47835e-111	0.678686	0.663	0.551	2.11164e-106	B cells	SIPA1L1	0.112
9.16371e-111	0.75259	0.326	0.208	5.56311e-106	B cells	LYPLAL1	0.118
2.60198e-110	0.555801	0.669	0.594	1.57961e-105	B cells	BBX	0.075
1.22465e-107	0.629279	0.368	0.246	7.4346e-103	B cells	PRKD3	0.122
9.59652e-107	0.603497	0.313	0.193	5.82585e-102	B cells	RNASE6	0.12
1.18961e-105	0.564223	0.274	0.153	7.22188e-101	B cells	PTPRK	0.121
3.05635e-104	0.643944	0.265	0.153	1.85545e-99	B cells	ANKAR	0.112
2.14696e-102	0.54858	0.538	0.431	1.30338e-97	B cells	SMDT1	0.107
2.42755e-102	0.638076	0.394	0.286	1.47372e-97	B cells	MBD4	0.108
3.48406e-101	0.527905	0.616	0.544	2.1151e-96	B cells	OGA	0.072
1.80858e-100	0.65267	0.488	0.388	1.09795e-95	B cells	PHTF2	0.1
3.30126e-99	0.560541	0.7	0.649	2.00413e-94	B cells	PPP3CA	0.051
9.69276e-99	0.705511	0.459	0.358	5.88428e-94	B cells	DENND4A	0.101
7.05124e-96	0.695923	0.294	0.179	4.28066e-91	B cells	CSGALNACT1	0.115
9.0252e-96	0.611113	0.51	0.406	5.47902e-91	B cells	SYNGR2	0.104
9.29642e-95	0.469881	0.615	0.538	5.64367e-90	B cells	SF1	0.077
3.00993e-94	0.637397	0.406	0.296	1.82727e-89	B cells	RNASEH2B	0.11
3.90121e-93	0.418622	0.78	0.72	2.36834e-88	B cells	EEF2	0.06
1.00674e-92	0.503482	0.534	0.43	6.11172e-88	B cells	CIRBP	0.104
4.04869e-92	0.553148	0.526	0.435	2.45788e-87	B cells	ANAPC16	0.091
2.00655e-91	0.483955	0.674	0.622	1.21813e-86	B cells	GPBP1	0.052
4.00522e-91	0.5211	0.602	0.522	2.43149e-86	B cells	MYCBP2	0.08
7.69159e-91	0.568309	0.299	0.189	4.66941e-86	B cells	BICD1	0.11
1.72993e-90	0.522672	0.349	0.236	1.0502e-85	B cells	SYPL1	0.113
1.17511e-89	0.589961	0.409	0.306	7.13386e-85	B cells	APPL1	0.103
1.72063e-89	0.560508	0.37	0.259	1.04456e-84	B cells	PXK	0.111
4.94694e-89	0.55314	0.298	0.19	3.00319e-84	B cells	MARCHF8	0.108
2.96418e-88	0.478873	0.287	0.177	1.7995e-83	B cells	KPNA5	0.11
9.29335e-88	0.320593	0.265	0.148	5.64181e-83	B cells	S1PR1	0.117
1.63804e-87	0.454335	0.743	0.71	9.94422e-83	B cells	BPTF	0.033
4.23953e-87	0.633398	0.537	0.469	2.57373e-82	B cells	RBM26	0.068
4.72799e-87	0.431284	0.591	0.485	2.87027e-82	B cells	SNHG29	0.106
2.25754e-85	0.426147	0.251	0.146	1.37051e-80	B cells	SH3BP5	0.105
2.81805e-85	0.630982	0.462	0.375	1.71078e-80	B cells	PIKFYVE	0.087
2.87474e-85	0.537923	0.314	0.211	1.7452e-80	B cells	SMARCB1	0.103
1.13651e-83	0.382215	0.766	0.737	6.89952e-79	B cells	DDX17	0.029
2.09719e-83	0.656534	0.344	0.24	1.27316e-78	B cells	PIP5K1B	0.104
3.09503e-82	0.330753	0.82	0.771	1.87893e-77	B cells	COX7C	0.049
3.56839e-81	0.561571	0.585	0.53	2.1663e-76	B cells	BOD1L1	0.055
1.16715e-80	0.526147	0.445	0.351	7.08552e-76	B cells	ISCU	0.094
1.19065e-80	0.51032	0.64	0.591	7.22817e-76	B cells	TMEM131	0.049
6.67586e-77	0.599825	0.453	0.372	4.05278e-72	B cells	SECISBP2L	0.081
1.60755e-76	0.449293	0.569	0.5	9.75914e-72	B cells	SNX3	0.069
2.38951e-76	0.420133	0.59	0.505	1.45063e-71	B cells	SNHG6	0.085
5.10466e-75	0.828763	0.456	0.387	3.09894e-70	B cells	VRK2	0.069
6.24132e-75	0.569857	0.416	0.327	3.78898e-70	B cells	ARHGAP17	0.089
1.10964e-70	0.456019	0.592	0.53	6.73641e-66	B cells	NSD3	0.062
4.05772e-69	0.477112	0.282	0.192	2.46336e-64	B cells	ZBED5	0.09
1.22587e-67	0.387154	0.627	0.524	7.44198e-63	B cells	INPP5D	0.103
3.95813e-67	0.539576	0.292	0.202	2.4029e-62	B cells	EIF2AK3	0.09
7.58487e-66	0.37558	0.731	0.718	4.60462e-61	B cells	KMT2E	0.013
2.8215e-65	0.351682	0.73	0.644	1.71287e-60	B cells	CD53	0.086
5.2696e-65	0.458139	0.507	0.433	3.19907e-60	B cells	TAF7	0.074
5.648e-65	0.359684	0.296	0.195	3.42879e-60	B cells	PPP3CC	0.101
3.13435e-64	0.575492	0.287	0.203	1.9028e-59	B cells	ATP10D	0.084
5.14351e-64	0.505097	0.577	0.53	3.12252e-59	B cells	KDM4C	0.047
8.497e-64	0.472233	0.453	0.347	5.15836e-59	B cells	ALOX5	0.106
1.04535e-63	0.48303	0.668	0.644	6.34612e-59	B cells	ARID1B	0.024
2.2482e-63	0.488011	0.381	0.289	1.36484e-58	B cells	ATF7IP2	0.092
1.12587e-62	0.415192	0.688	0.646	6.83494e-58	B cells	TBC1D22A	0.042
3.53421e-62	0.457027	0.389	0.3	2.14555e-57	B cells	SNHG8	0.089
4.15526e-62	0.460729	0.293	0.201	2.52257e-57	B cells	BASP1	0.092
4.67091e-62	0.400648	0.542	0.467	2.83562e-57	B cells	MPHOSPH8	0.075
2.48201e-61	0.510781	0.551	0.504	1.50678e-56	B cells	PTPN1	0.047
1.27987e-60	0.422058	0.723	0.694	7.76985e-56	B cells	TBC1D5	0.029
2.82084e-60	0.440885	0.505	0.444	1.71248e-55	B cells	MTPN	0.061
5.64595e-59	0.479307	0.411	0.324	3.42754e-54	B cells	RPS6KA5	0.087
1.145e-58	0.448206	0.521	0.439	6.95106e-54	B cells	NOTCH2	0.082
8.96857e-55	0.401243	0.597	0.537	5.44464e-50	B cells	NIN	0.06
2.55864e-54	0.474708	0.387	0.307	1.5533e-49	B cells	GSAP	0.08
2.64437e-54	0.486783	0.502	0.441	1.60534e-49	B cells	RFX3	0.061
3.24987e-54	1.23036	0.45	0.408	1.97293e-49	B cells	PDE4D	0.042
3.96576e-54	0.438901	0.548	0.493	2.40754e-49	B cells	PHC3	0.055
2.07584e-53	0.327086	0.613	0.53	1.2602e-48	B cells	MAP4K4	0.083
7.76802e-53	0.461395	0.428	0.343	4.71581e-48	B cells	FUT8	0.085
8.61721e-53	0.336643	0.476	0.373	5.23134e-48	B cells	PIK3AP1	0.103
4.98404e-52	0.38331	0.28	0.198	3.02571e-47	B cells	EEF1A1P5	0.082
5.02115e-52	0.472154	0.267	0.187	3.04824e-47	B cells	DISP1	0.08
1.7626e-51	0.471353	0.554	0.499	1.07004e-46	B cells	RERE	0.055
1.55411e-50	0.471747	0.475	0.413	9.43472e-46	B cells	NBPF10	0.062
4.68343e-49	0.450464	0.44	0.374	2.84321e-44	B cells	CDC40	0.066
2.61156e-48	0.382722	0.402	0.313	1.58543e-43	B cells	ATP8A1	0.089
8.89628e-48	0.331966	0.645	0.614	5.40075e-43	B cells	HNRNPDL	0.031
2.10315e-47	0.375195	0.599	0.572	1.27678e-42	B cells	LUC7L3	0.027
2.39689e-47	0.47678	0.265	0.193	1.45511e-42	B cells	RP11-1277A3.2	0.072
2.59215e-47	0.433463	0.416	0.351	1.57364e-42	B cells	TAF1D	0.065
4.31524e-47	0.464803	0.387	0.322	2.6197e-42	B cells	NGLY1	0.065
4.93554e-47	0.488535	0.351	0.282	2.99627e-42	B cells	USF3	0.069
1.99391e-46	0.336064	0.566	0.516	1.21046e-41	B cells	EIF3F	0.05
7.79553e-46	0.38036	0.449	0.381	4.73251e-41	B cells	EIF3L	0.068
1.31541e-45	0.431233	0.274	0.201	7.98561e-41	B cells	CEP120	0.073
4.28667e-45	0.364791	0.639	0.583	2.60235e-40	B cells	CD55	0.056
7.43945e-45	0.365536	0.418	0.332	4.51634e-40	B cells	AKT3	0.086
2.31956e-43	0.401747	0.597	0.568	1.40816e-38	B cells	CHD9	0.029
2.56356e-43	0.325904	0.506	0.435	1.55628e-38	B cells	ATM	0.071
3.76335e-42	0.378565	0.539	0.505	2.28465e-37	B cells	TLK1	0.034
2.39686e-40	0.364524	0.557	0.519	1.45508e-35	B cells	SHOC2	0.038
2.79627e-40	0.463904	0.287	0.218	1.69756e-35	B cells	XKR6	0.069
5.51109e-40	0.370241	0.579	0.529	3.34567e-35	B cells	PARP14	0.05
2.27558e-39	0.600599	0.277	0.213	1.38146e-34	B cells	LINC01473	0.064
4.14707e-39	0.358615	0.256	0.188	2.5176e-34	B cells	CDH12	0.068
5.98069e-39	0.487691	0.278	0.204	3.63076e-34	B cells	ST6GALNAC3	0.074
8.88355e-39	0.380287	0.501	0.458	5.39303e-34	B cells	ZRANB2	0.043
1.16543e-38	0.373217	0.565	0.479	7.0751e-34	B cells	UBE2E2	0.086
4.9105e-38	0.361092	0.295	0.226	2.98106e-33	B cells	SLC44A2	0.069
5.92624e-38	0.507104	0.552	0.511	3.5977e-33	B cells	LINC01619	0.041
2.27916e-37	0.410797	0.484	0.425	1.38363e-32	B cells	TRIO	0.059
8.22323e-37	0.394028	0.25	0.187	4.99216e-32	B cells	CLK4	0.063
1.39764e-36	0.378258	0.509	0.474	8.48479e-32	B cells	EIF2S3	0.035
1.91312e-35	0.408264	0.392	0.338	1.16142e-30	B cells	TRAK1	0.054
9.12771e-35	0.41763	0.548	0.52	5.54125e-30	B cells	MIS18BP1	0.028
1.19366e-34	0.376682	0.281	0.221	7.24646e-30	B cells	FRG1HP	0.06
2.67762e-34	0.325434	0.296	0.227	1.62553e-29	B cells	LAT2	0.069
7.50901e-34	0.476448	0.36	0.304	4.55857e-29	B cells	GUSBP1	0.056
1.39716e-33	0.376734	0.57	0.545	8.48186e-29	B cells	SELENOF	0.025
1.54856e-33	0.386073	0.485	0.452	9.401e-29	B cells	UPF2	0.033
5.394e-33	0.338648	0.575	0.537	3.27459e-28	B cells	CCND3	0.038
6.23049e-32	0.362848	0.256	0.197	3.7824e-27	B cells	CD82	0.059
8.07295e-32	0.41949	0.317	0.264	4.90093e-27	B cells	RNF141	0.053
1.57197e-31	0.388419	0.443	0.406	9.5431e-27	B cells	PCGF5	0.037
4.80715e-31	0.373274	0.297	0.241	2.91832e-26	B cells	ZNF431	0.056
1.47553e-30	0.319443	0.563	0.54	8.95767e-26	B cells	ATP6V1G1	0.023
2.19616e-30	0.357583	0.587	0.586	1.33325e-25	B cells	ANKRD12	0.001
2.17432e-29	0.356952	0.55	0.529	1.31999e-24	B cells	TTC3	0.021
1.6065e-28	0.4367	0.261	0.208	9.75272e-24	B cells	ENSG00000273748	0.053
2.0072e-28	0.319851	0.402	0.358	1.21853e-23	B cells	DMTF1	0.044
4.48293e-28	0.404807	0.305	0.256	2.7215e-23	B cells	AKAP11	0.049
4.87411e-28	0.329463	0.58	0.547	2.95897e-23	B cells	NBPF14	0.033
6.69412e-28	0.403623	0.396	0.362	4.06387e-23	B cells	MORC3	0.034
1.56542e-27	0.408192	0.355	0.315	9.50337e-23	B cells	EIF1B	0.04
1.68987e-27	0.427425	0.517	0.501	1.02588e-22	B cells	TANK	0.016
1.87098e-27	0.39011	0.475	0.434	1.13583e-22	B cells	JAZF1	0.041
2.0454e-27	0.300541	0.69	0.692	1.24172e-22	B cells	IFI16	-0.002
2.8298e-27	0.405795	0.447	0.417	1.71792e-22	B cells	ZNF33A	0.03
4.47279e-27	0.305632	0.535	0.509	2.71534e-22	B cells	EIF4A2	0.026
1.12081e-26	0.38067	0.275	0.225	6.80422e-22	B cells	MTMR1	0.05
2.02578e-26	0.315133	0.304	0.247	1.22981e-21	B cells	CLIC4	0.057
2.64876e-26	0.360262	0.415	0.372	1.60801e-21	B cells	CREBRF	0.043
8.74429e-26	0.354582	0.419	0.387	5.30848e-21	B cells	PCMTD1	0.032
1.20109e-25	0.36698	0.252	0.199	7.29156e-21	B cells	SNHG14	0.053
3.9052e-25	0.323154	0.535	0.515	2.37077e-20	B cells	RBM6	0.02
5.88429e-25	0.462326	0.333	0.293	3.57223e-20	B cells	IQCB1	0.04
7.9196e-25	0.308616	0.456	0.426	4.80783e-20	B cells	DDX6	0.03
1.50733e-24	0.342973	0.455	0.433	9.15071e-20	B cells	PNN	0.022
5.81484e-24	0.386419	0.386	0.352	3.53007e-19	B cells	CEPT1	0.034
5.84817e-24	0.39778	0.441	0.418	3.55031e-19	B cells	AFTPH	0.023
1.0068e-23	0.377718	0.356	0.317	6.11208e-19	B cells	LRCH1	0.039
1.12859e-23	0.382699	0.343	0.306	6.85146e-19	B cells	TRIM38	0.037
7.98561e-23	0.367779	0.275	0.233	4.8479e-18	B cells	PWP1	0.042
1.20212e-22	0.306731	0.535	0.525	7.29785e-18	B cells	FNBP4	0.01
1.36397e-22	0.303363	0.387	0.343	8.28036e-18	B cells	PDCD4	0.044
4.12905e-22	0.320995	0.337	0.295	2.50667e-17	B cells	RPL22L1	0.042
1.32904e-21	0.331202	0.261	0.216	8.06831e-17	B cells	USPL1	0.045
4.14158e-21	0.323054	0.515	0.508	2.51427e-16	B cells	VPS13C	0.007
3.30986e-20	0.421225	0.329	0.293	2.00935e-15	B cells	ACYP2	0.036
6.853e-20	0.311606	0.483	0.461	4.16032e-15	B cells	ERP29	0.022
6.86889e-20	0.330483	0.402	0.362	4.16996e-15	B cells	BMP2K	0.04
1.23982e-19	0.423316	0.354	0.329	7.52668e-15	B cells	ALG13	0.025
1.94291e-19	0.309119	0.342	0.307	1.1795e-14	B cells	CHCHD10	0.035
1.95746e-19	0.310123	0.54	0.54	1.18834e-14	B cells	GCC2	0
3.77094e-19	0.355277	0.356	0.319	2.28926e-14	B cells	SESTD1	0.037
4.07588e-19	0.3343	0.421	0.399	2.47438e-14	B cells	C1GALT1	0.022
5.6013e-19	0.368233	0.521	0.507	3.40044e-14	B cells	RAD51B	0.014
1.42952e-18	0.329441	0.427	0.412	8.67833e-14	B cells	TCEA1	0.015
1.51809e-18	0.408344	0.416	0.383	9.21601e-14	B cells	SNX9	0.033
1.52321e-18	0.441553	0.274	0.24	9.24707e-14	B cells	CCDC18	0.034
1.72275e-18	0.314675	0.337	0.3	1.04585e-13	B cells	CWF19L2	0.037
2.3446e-18	0.309489	0.464	0.447	1.42336e-13	B cells	CLK1	0.017
3.86001e-18	0.312927	0.428	0.407	2.34333e-13	B cells	UBXN1	0.021
4.0602e-18	0.318799	0.43	0.415	2.46487e-13	B cells	ADD1	0.015
4.30074e-18	0.551432	0.544	0.586	2.6109e-13	B cells	VOPP1	-0.042
1.24607e-17	0.319778	0.427	0.414	7.56466e-13	B cells	CENPC	0.013
4.79933e-17	0.423641	0.372	0.34	2.91357e-12	B cells	XYLT1	0.032
2.42066e-16	0.325938	0.375	0.35	1.46953e-11	B cells	KLHL24	0.025
3.66522e-16	0.314487	0.251	0.217	2.22508e-11	B cells	LSM10	0.034
6.9863e-16	0.319959	0.463	0.45	4.24125e-11	B cells	RFX7	0.013
1.05242e-15	0.385996	0.402	0.389	6.389e-11	B cells	PIK3CA	0.013
2.1162e-15	0.306512	0.455	0.449	1.2847e-10	B cells	PHKB	0.006
3.99339e-15	0.307632	0.299	0.27	2.42431e-10	B cells	LEMD3	0.029
4.95468e-15	0.487055	0.276	0.249	3.00789e-10	B cells	SESN1	0.027
5.235e-15	0.307362	0.354	0.336	3.17807e-10	B cells	ANKRD10	0.018
3.8425e-14	0.350139	0.381	0.367	2.33271e-09	B cells	HMBOX1	0.014
8.21896e-14	0.350801	0.397	0.39	4.98956e-09	B cells	ADNP	0.007
1.1235e-12	0.377942	0.391	0.372	6.82056e-08	B cells	SAMD9L	0.019
3.71156e-11	0.347677	0.278	0.255	2.25321e-06	B cells	FAM126A	0.023
1.68221e-10	0.333397	0.284	0.268	1.02124e-05	B cells	BLOC1S2	0.016
2.59897e-10	0.316253	0.278	0.255	1.57778e-05	B cells	FOXO1	0.023
3.70104e-10	0.339308	0.381	0.378	2.24683e-05	B cells	POU2F1	0.003
8.92302e-10	0.336932	0.264	0.243	5.41699e-05	B cells	ZNF37BP	0.021
6.02498e-09	0.330036	0.259	0.243	0.000365765	B cells	CEP135	0.016
0	5.60064	0.583	0.112	0	Plasma	IGHA1	0.471
0	5.20935	0.414	0.066	0	Plasma	IGLC2	0.348
0	4.55887	0.361	0.042	0	Plasma	IGHA2	0.319
0	4.46533	0.29	0.046	0	Plasma	IGHG1	0.244
0	3.6096	0.259	0.028	0	Plasma	IGLC3	0.231
0	3.29237	0.604	0.036	0	Plasma	MZB1	0.568
0	2.62628	0.641	0.158	0	Plasma	MKI67	0.483
0	2.29605	0.749	0.258	0	Plasma	SEC11C	0.491
0	2.1228	0.911	0.594	0	Plasma	SUB1	0.317
0	2.11041	0.804	0.343	0	Plasma	GLCCI1	0.461
0	2.09393	0.579	0.165	0	Plasma	STMN1	0.414
0	1.9784	0.718	0.21	0	Plasma	CEP128	0.508
0	1.95531	0.595	0.088	0	Plasma	IFNG-AS1	0.507
0	1.93172	0.782	0.19	0	Plasma	CD38	0.592
0	1.84226	0.495	0.118	0	Plasma	CENPF	0.377
0	1.82752	0.408	0.071	0	Plasma	RP11-537P24.1	0.337
0	1.7877	0.543	0.121	0	Plasma	ASPM	0.422
0	1.78378	0.512	0.023	0	Plasma	POU2AF1	0.489
0	1.77576	0.796	0.344	0	Plasma	LMAN1	0.452
0	1.75867	0.601	0.138	0	Plasma	KCNQ5	0.463
0	1.73328	0.493	0.096	0	Plasma	RRM2	0.397
0	1.66839	0.356	0.015	0	Plasma	ANKRD36BP2	0.341
0	1.62459	0.435	0.097	0	Plasma	TOP2A	0.338
0	1.61503	0.485	0.122	0	Plasma	CENPE	0.363
0	1.59854	0.505	0.095	0	Plasma	DENND5B	0.41
0	1.57824	0.288	0.016	0	Plasma	AC096579.15	0.272
0	1.57217	0.467	0.02	0	Plasma	DERL3	0.447
0	1.52107	0.504	0.06	0	Plasma	IRF4	0.444
0	1.47276	0.576	0.08	0	Plasma	TENT5C	0.496
0	1.46445	0.67	0.204	0	Plasma	MANF	0.466
0	1.37465	0.399	0.041	0	Plasma	RP11-460N11.2	0.358
0	1.35667	0.555	0.157	0	Plasma	EAF2	0.398
0	1.3396	0.5	0.097	0	Plasma	KNL1	0.403
0	1.30612	0.41	0.016	0	Plasma	FCRL5	0.394
0	1.28519	0.58	0.171	0	Plasma	SPATS2	0.409
0	1.20791	0.349	0.009	0	Plasma	IGLL5	0.34
0	1.16527	0.583	0.158	0	Plasma	BRCA2	0.425
0	1.15359	0.536	0.097	0	Plasma	ITM2C	0.439
0	1.14014	0.36	0.048	0	Plasma	DLGAP5	0.312
0	1.12627	0.531	0.141	0	Plasma	SMC2	0.39
0	1.1159	0.683	0.189	0	Plasma	SLAMF7	0.494
0	1.10926	0.506	0.073	0	Plasma	BUB1	0.433
0	1.10191	0.505	0.116	0	Plasma	PTTG1	0.389
0	1.09953	0.521	0.089	0	Plasma	PIM2	0.432
0	1.08369	0.566	0.125	0	Plasma	MANEA	0.441
0	1.04795	0.579	0.141	0	Plasma	TMEM156	0.438
0	1.02406	0.654	0.158	0	Plasma	PALM2AKAP2	0.496
0	1.02363	0.425	0.069	0	Plasma	FBXO5	0.356
0	1.00652	0.406	0.058	0	Plasma	DTL	0.348
0	0.983099	0.423	0.069	0	Plasma	CLSPN	0.354
0	0.94784	0.377	0.065	0	Plasma	CEP55	0.312
0	0.938894	0.477	0.072	0	Plasma	GGH	0.405
0	0.904845	0.406	0.068	0	Plasma	KIF15	0.338
0	0.882956	0.427	0.084	0	Plasma	NCAPG	0.343
0	0.85635	0.482	0.111	0	Plasma	HELLS	0.371
0	0.84304	0.388	0.055	0	Plasma	BIRC5	0.333
0	0.812501	0.459	0.072	0	Plasma	LIN9	0.387
0	0.80827	0.364	0.068	0	Plasma	NUF2	0.296
0	0.801812	0.297	0.042	0	Plasma	H1-5	0.255
0	0.790403	0.388	0.066	0	Plasma	POLQ	0.322
0	0.780135	0.424	0.09	0	Plasma	GNG7	0.334
0	0.751398	0.336	0.052	0	Plasma	CCNA2	0.284
0	0.743409	0.505	0.1	0	Plasma	CEP97	0.405
0	0.741171	0.308	0.005	0	Plasma	RP11-46J23.2	0.303
0	0.723466	0.488	0.111	0	Plasma	BLM	0.377
0	0.710112	0.268	0.023	0	Plasma	H2AC14	0.245
0	0.707173	0.348	0.045	0	Plasma	HMMR	0.303
0	0.6994	0.575	0.151	0	Plasma	CCDC167	0.424
0	0.693348	0.381	0.039	0	Plasma	CD79A	0.342
0	0.689077	0.263	0.025	0	Plasma	EML6	0.238
0	0.683435	0.55	0.145	0	Plasma	CASP3	0.405
0	0.679567	0.306	0.038	0	Plasma	GTSE1	0.268
0	0.676559	0.38	0.041	0	Plasma	SHCBP1	0.339
0	0.674685	0.477	0.11	0	Plasma	KNTC1	0.367
0	0.66958	0.42	0.083	0	Plasma	MAD2L1	0.337
0	0.666912	0.285	0.019	0	Plasma	RP11-689B22.2	0.266
0	0.645391	0.348	0.024	0	Plasma	PKHD1L1	0.324
0	0.640241	0.346	0.061	0	Plasma	CDKN3	0.285
0	0.634911	0.424	0.067	0	Plasma	HBB	0.357
0	0.633636	0.301	0.043	0	Plasma	LINC02362	0.258
0	0.631668	0.317	0.056	0	Plasma	CDCA2	0.261
0	0.621898	0.369	0.062	0	Plasma	PARPBP	0.307
0	0.615057	0.377	0.061	0	Plasma	CENPM	0.316
0	0.607186	0.365	0.069	0	Plasma	ZWINT	0.296
0	0.59509	0.323	0.023	0	Plasma	COL4A4	0.3
0	0.582526	0.307	0.05	0	Plasma	DEPDC1B	0.257
0	0.577804	0.455	0.095	0	Plasma	RP11-284N8.3	0.36
0	0.553257	0.473	0.085	0	Plasma	LAX1	0.388
0	0.548468	0.318	0.048	0	Plasma	NCAPH	0.27
0	0.528993	0.293	0.04	0	Plasma	GINS2	0.253
0	0.520698	0.332	0.019	0	Plasma	CPNE5	0.313
0	0.505231	0.273	0.006	0	Plasma	TNFRSF13B	0.267
0	0.504972	0.324	0.053	0	Plasma	ORC6	0.271
0	0.502225	0.303	0.05	0	Plasma	SKA3	0.253
0	0.501245	0.288	0.044	0	Plasma	PARM1	0.244
0	0.494974	0.255	0.023	0	Plasma	TOX2	0.232
0	0.492605	0.313	0.018	0	Plasma	NUGGC	0.295
0	0.4874	0.275	0.03	0	Plasma	AURKB	0.245
0	0.48669	0.342	0.05	0	Plasma	MYBL2	0.292
0	0.478612	0.306	0.038	0	Plasma	CDC6	0.268
0	0.475812	0.291	0.033	0	Plasma	HERC2P7.2	0.258
0	0.448595	0.4	0.074	0	Plasma	MEI1	0.326
0	0.438738	0.261	0.039	0	Plasma	SPC25	0.222
0	0.406304	0.386	0.055	0	Plasma	IFI27L1	0.331
0	0.38038	0.257	0.034	0	Plasma	KCNN3	0.223
0	0.3494	0.285	0.037	0	Plasma	E2F2	0.248
0	0.315336	0.285	0.031	0	Plasma	SLC38A5	0.254
3.3855e-301	0.80323	0.373	0.076	2.05527e-296	Plasma	NDC80	0.297
2.05623e-300	1.31368	0.759	0.293	1.24829e-295	Plasma	ISG20	0.466
3.00716e-298	0.89357	0.424	0.097	1.82559e-293	Plasma	KIF11	0.327
1.87674e-297	0.633049	0.377	0.075	1.13933e-292	Plasma	BLNK	0.302
7.54553e-296	0.750468	0.421	0.094	4.58074e-291	Plasma	CENPU	0.327
1.07705e-294	0.814239	0.47	0.118	6.53856e-290	Plasma	HSPA13	0.352
9.89751e-294	0.397406	0.251	0.038	6.00858e-289	Plasma	EXO1	0.213
1.07599e-293	0.742825	0.387	0.084	6.53209e-289	Plasma	DHFR	0.303
2.6132e-292	2.47592	0.832	0.472	1.58642e-287	Plasma	HSP90B1	0.36
1.04149e-290	0.649792	0.398	0.083	6.32267e-286	Plasma	AQP3	0.315
2.42367e-289	0.78084	0.437	0.104	1.47136e-284	Plasma	TPD52	0.333
2.48979e-289	0.412792	0.281	0.046	1.5115e-284	Plasma	KIFC1	0.235
4.34209e-289	0.671603	0.308	0.055	2.636e-284	Plasma	CDCA8	0.253
3.33182e-287	0.407766	0.259	0.04	2.02268e-282	Plasma	CDCA5	0.219
3.15307e-286	0.772122	0.485	0.125	1.91416e-281	Plasma	GMNN	0.36
1.72554e-284	0.42708	0.269	0.043	1.04754e-279	Plasma	MCM10	0.226
1.23664e-282	1.13786	0.638	0.211	7.50737e-278	Plasma	SEL1L3	0.427
4.00215e-282	0.641357	0.534	0.145	2.42963e-277	Plasma	CRELD2	0.389
1.05551e-279	0.772396	0.411	0.093	6.40778e-275	Plasma	RASGRP3	0.318
2.84355e-278	0.512534	0.424	0.093	1.72626e-273	Plasma	ZBP1	0.331
6.80665e-278	0.582087	0.486	0.124	4.13218e-273	Plasma	TXNDC15	0.362
2.48632e-276	0.476096	0.323	0.061	1.50939e-271	Plasma	WDR76	0.262
8.55071e-276	0.335672	0.255	0.039	5.19096e-271	Plasma	RAB30	0.216
5.26347e-275	1.04977	0.567	0.168	3.19535e-270	Plasma	SETBP1	0.399
4.04541e-270	0.495322	0.305	0.056	2.45589e-265	Plasma	KIF4A	0.249
2.16392e-269	1.39714	0.498	0.146	1.31367e-264	Plasma	COBLL1	0.352
8.08065e-269	0.659814	0.315	0.061	4.9056e-264	Plasma	ESCO2	0.254
1.29547e-268	1.29954	0.835	0.454	7.86456e-264	Plasma	SPCS2	0.381
4.52121e-267	0.848115	0.301	0.057	2.74474e-262	Plasma	FAM111B	0.244
2.68643e-266	0.5659	0.356	0.076	1.63088e-261	Plasma	NCAPG2	0.28
1.586e-265	0.927799	0.426	0.104	9.6283e-261	Plasma	BRIP1	0.322
6.74284e-264	1.03038	0.434	0.108	4.09344e-259	Plasma	TPX2	0.326
2.85865e-263	0.47423	0.348	0.072	1.73543e-258	Plasma	CENPJ	0.276
5.94179e-260	0.358154	0.314	0.06	3.60714e-255	Plasma	TIFA	0.254
1.0625e-258	0.496136	0.447	0.105	6.45021e-254	Plasma	P2RY10	0.342
2.78129e-257	0.47242	0.291	0.054	1.68846e-252	Plasma	BUB1B	0.237
3.26941e-257	1.44199	0.513	0.163	1.98479e-252	Plasma	MYO1D	0.35
4.35921e-255	0.996704	0.715	0.271	2.64639e-250	Plasma	NUCB2	0.444
1.8988e-254	0.696661	0.391	0.093	1.15272e-249	Plasma	CIP2A	0.298
1.15492e-252	0.763081	0.327	0.068	7.0113e-248	Plasma	KIF14	0.259
5.70884e-251	0.366669	0.26	0.043	3.46572e-246	Plasma	STAP1	0.217
1.44135e-250	0.955695	0.661	0.24	8.75016e-246	Plasma	SDF2L1	0.421
4.96589e-249	0.398975	0.277	0.05	3.01469e-244	Plasma	ASF1B	0.227
5.73201e-249	0.715157	0.505	0.144	3.47979e-244	Plasma	C11orf80	0.361
7.18321e-249	0.680813	0.341	0.073	4.36079e-244	Plasma	CDK1	0.268
4.07224e-248	0.975393	0.578	0.184	2.47217e-243	Plasma	DIPK1A	0.394
1.74024e-243	1.1709	0.76	0.36	1.05646e-238	Plasma	OSTC	0.4
3.80929e-242	0.540885	0.315	0.066	2.31254e-237	Plasma	WDHD1	0.249
8.69969e-242	0.673517	0.351	0.08	5.28141e-237	Plasma	MELK	0.271
3.6053e-241	0.558914	0.323	0.069	2.18871e-236	Plasma	STIL	0.254
9.96209e-241	1.08673	0.719	0.321	6.04778e-236	Plasma	SPCS3	0.398
3.40383e-239	0.903601	0.718	0.272	2.06639e-234	Plasma	SP140	0.446
6.95379e-239	0.745965	0.359	0.083	4.22151e-234	Plasma	RP5-1086D14.6	0.276
1.1108e-238	1.10723	0.635	0.238	6.74343e-234	Plasma	EZH2	0.397
3.3023e-238	0.352971	0.3	0.06	2.00476e-233	Plasma	CENPH	0.24
6.43104e-236	0.55455	0.423	0.108	3.90416e-231	Plasma	CHEK1	0.315
7.85139e-236	0.465799	0.363	0.082	4.76642e-231	Plasma	UBE2T	0.281
9.49068e-235	1.37939	0.771	0.391	5.7616e-230	Plasma	SSR3	0.38
7.49332e-233	0.351568	0.341	0.075	4.54904e-228	Plasma	MCEE	0.266
3.69466e-231	0.599634	0.355	0.082	2.24295e-226	Plasma	TK1	0.273
1.30532e-228	0.94565	0.404	0.105	7.92433e-224	Plasma	DIAPH3	0.299
1.98853e-228	1.66651	0.871	0.577	1.2072e-223	Plasma	PPIB	0.294
1.37636e-227	1.97436	0.651	0.298	8.35559e-223	Plasma	ELL2	0.353
1.49564e-227	0.844797	0.425	0.119	9.07971e-223	Plasma	MCM6	0.306
5.82585e-225	1.14933	0.612	0.227	3.53676e-220	Plasma	KIF20B	0.385
1.03169e-224	1.4065	0.554	0.198	6.26315e-220	Plasma	PCNA	0.356
9.54344e-224	0.721326	0.478	0.144	5.79363e-219	Plasma	RRM1	0.334
1.94229e-223	0.461082	0.311	0.067	1.17913e-218	Plasma	ZGRF1	0.244
4.47376e-223	0.306632	0.32	0.068	2.71593e-218	Plasma	SEC61A1	0.252
5.7586e-223	0.519044	0.494	0.141	3.49593e-218	Plasma	OXCT1	0.353
8.42478e-220	0.417547	0.261	0.05	5.11451e-215	Plasma	CCNB2	0.211
1.51815e-219	1.42467	0.734	0.343	9.21636e-215	Plasma	FUT8	0.391
2.90797e-218	0.516796	0.376	0.093	1.76537e-213	Plasma	DNAJC9	0.283
8.37637e-217	0.653477	0.467	0.136	5.08513e-212	Plasma	CKS2	0.331
1.08751e-216	1.28663	0.609	0.24	6.60207e-212	Plasma	DUT	0.369
1.47919e-216	0.621907	0.384	0.099	8.97988e-212	Plasma	FANCI	0.285
7.62987e-216	0.645435	0.546	0.177	4.63194e-211	Plasma	VRK1	0.369
8.89133e-214	0.390713	0.266	0.052	5.39775e-209	Plasma	CIT	0.214
3.49225e-213	0.397324	0.267	0.053	2.12007e-208	Plasma	PLK4	0.214
1.40461e-211	0.560547	0.477	0.141	8.5271e-207	Plasma	LIN52	0.336
8.33202e-211	0.825946	0.525	0.176	5.0582e-206	Plasma	LARP1B	0.349
2.60317e-209	0.356206	0.304	0.066	1.58033e-204	Plasma	LIG1	0.238
2.17463e-207	0.998351	0.792	0.394	1.32018e-202	Plasma	PDIA6	0.398
2.45557e-203	0.366076	0.269	0.055	1.49073e-198	Plasma	PRR11	0.214
1.71069e-202	0.781963	0.601	0.224	1.03853e-197	Plasma	RPA3	0.377
7.69693e-200	1.12906	0.85	0.543	4.67265e-195	Plasma	SEC61B	0.307
1.81574e-199	0.354538	0.285	0.061	1.1023e-194	Plasma	E2F5	0.224
6.44421e-199	0.400201	0.391	0.105	3.91215e-194	Plasma	SRPRB	0.286
1.25742e-198	0.499778	0.361	0.093	7.63354e-194	Plasma	BRCA1	0.268
3.18118e-198	0.364708	0.327	0.078	1.93123e-193	Plasma	PDIA5	0.249
1.31237e-196	0.613578	0.462	0.143	7.96715e-192	Plasma	CEP152	0.319
2.02948e-195	0.444567	0.391	0.106	1.23205e-190	Plasma	SASS6	0.285
3.05238e-195	0.437326	0.381	0.101	1.85304e-190	Plasma	TMEM106C	0.28
5.95646e-195	1.86829	0.722	0.404	3.61605e-190	Plasma	XBP1	0.318
8.40952e-195	1.32714	0.777	0.425	5.10525e-190	Plasma	H2AZ1	0.352
1.60386e-194	0.995551	0.641	0.258	9.73672e-190	Plasma	H1-2	0.383
4.78606e-194	1.08443	0.627	0.268	2.90552e-189	Plasma	PDIA4	0.359
6.77575e-194	0.37435	0.391	0.106	4.11342e-189	Plasma	TCF3	0.285
7.61722e-194	1.0094	0.818	0.467	4.62426e-189	Plasma	SPCS1	0.351
2.14785e-193	0.769726	0.357	0.095	1.30392e-188	Plasma	SGO2	0.262
9.32877e-192	0.664819	0.767	0.302	5.66331e-187	Plasma	IKZF3	0.465
2.3251e-191	0.97291	0.834	0.486	1.41152e-186	Plasma	DAD1	0.348
4.79208e-191	0.736729	0.709	0.278	2.90918e-186	Plasma	ZEB1	0.431
5.27021e-191	0.602993	0.571	0.207	3.19944e-186	Plasma	ALG5	0.364
1.17273e-190	0.569922	0.422	0.123	7.11939e-186	Plasma	NXPE3	0.299
3.39689e-190	0.665051	0.642	0.253	2.06219e-185	Plasma	ACADM	0.389
4.16104e-189	0.783647	0.518	0.188	2.52609e-184	Plasma	SEC24A	0.33
4.59466e-189	0.330816	0.341	0.085	2.78933e-184	Plasma	SLC35F2	0.256
4.19199e-188	0.542736	0.338	0.086	2.54487e-183	Plasma	RAD51AP1	0.252
4.14916e-187	0.58385	0.645	0.252	2.51887e-182	Plasma	NDUFB6	0.393
3.71334e-184	0.809293	0.643	0.263	2.2543e-179	Plasma	FAM214A	0.38
2.37671e-183	0.344602	0.26	0.056	1.44286e-178	Plasma	POLE2	0.204
3.36175e-183	1.14118	0.605	0.261	2.04085e-178	Plasma	TXNDC11	0.344
1.52582e-182	0.96478	0.757	0.399	9.26297e-178	Plasma	USP48	0.358
4.8516e-182	0.75054	0.676	0.274	2.94531e-177	Plasma	C12orf75	0.402
1.41455e-181	0.720697	0.376	0.109	8.58744e-177	Plasma	CENPP	0.267
1.42319e-179	0.569203	0.309	0.076	8.63992e-175	Plasma	ARHGAP42	0.233
6.25745e-179	1.12996	0.868	0.583	3.79877e-174	Plasma	VOPP1	0.285
1.01748e-178	0.880293	0.66	0.294	6.17693e-174	Plasma	RPL22L1	0.366
1.77845e-177	0.970908	0.836	0.529	1.07966e-172	Plasma	TMEM258	0.307
5.94029e-177	0.34955	0.362	0.098	3.60623e-172	Plasma	SKA2	0.264
6.60918e-177	0.584071	0.402	0.12	4.0123e-172	Plasma	UBE2S	0.282
6.90149e-177	0.344389	0.315	0.079	4.18976e-172	Plasma	RFC4	0.236
2.26769e-176	0.4007	0.285	0.067	1.37667e-171	Plasma	H2AX	0.218
4.19301e-176	0.467746	0.477	0.153	2.54549e-171	Plasma	IKBIP	0.324
8.74143e-176	1.68032	0.74	0.462	5.30675e-171	Plasma	UBE2J1	0.278
1.47764e-174	0.358994	0.25	0.053	8.97049e-170	Plasma	AC074289.1	0.197
2.37636e-173	1.04323	0.652	0.306	1.44264e-168	Plasma	MYDGF	0.346
2.67017e-173	0.41916	0.294	0.072	1.621e-168	Plasma	SPDL1	0.222
5.11666e-173	0.554171	0.479	0.16	3.10622e-168	Plasma	CBX5	0.319
6.33075e-173	0.925774	0.778	0.433	3.84327e-168	Plasma	SRP72	0.345
2.1744e-172	0.677402	0.399	0.121	1.32004e-167	Plasma	OSBPL10	0.278
9.50991e-172	0.460837	0.469	0.158	5.77328e-167	Plasma	SLC35B1	0.311
1.19614e-171	1.11728	0.737	0.401	7.26154e-167	Plasma	UBE2G1	0.336
1.42635e-171	0.428418	0.436	0.136	8.65907e-167	Plasma	INTS7	0.3
1.12879e-170	0.452383	0.496	0.17	6.85267e-166	Plasma	SSR1	0.326
4.91536e-170	0.320214	0.289	0.07	2.98402e-165	Plasma	FANCD2	0.219
5.05205e-170	0.330948	0.273	0.064	3.067e-165	Plasma	DNA2	0.209
5.21081e-170	0.331892	0.36	0.1	3.16338e-165	Plasma	RAD51C	0.26
2.53582e-169	0.329069	0.292	0.071	1.53945e-164	Plasma	ALG14	0.221
4.08506e-169	0.725701	0.576	0.233	2.47996e-164	Plasma	GNL3	0.343
4.99821e-169	0.726375	0.504	0.168	3.03432e-164	Plasma	ITM2A	0.336
3.04847e-168	0.311573	0.335	0.089	1.85066e-163	Plasma	SYVN1	0.246
3.02731e-165	0.661936	0.762	0.372	1.83782e-160	Plasma	PARP1	0.39
4.89048e-165	0.407659	0.419	0.132	2.96891e-160	Plasma	FAM98A	0.287
1.51482e-164	0.816926	0.527	0.202	9.19615e-160	Plasma	EIF2AK3	0.325
2.02566e-164	0.946446	0.721	0.365	1.22974e-159	Plasma	ANP32E	0.356
2.41316e-164	0.935889	0.78	0.441	1.46498e-159	Plasma	SEC61G	0.339
1.07448e-163	0.647087	0.472	0.165	6.52297e-159	Plasma	MCM3	0.307
1.09809e-163	0.714815	0.607	0.258	6.66631e-159	Plasma	SAR1B	0.349
1.13806e-163	0.493683	0.279	0.067	6.90892e-159	Plasma	APOLD1	0.212
9.52283e-163	0.404563	0.511	0.18	5.78112e-158	Plasma	MRPS14	0.331
9.55172e-163	0.675695	0.484	0.178	5.79866e-158	Plasma	HERC2P2	0.306
1.61261e-162	0.606497	0.531	0.199	9.78981e-158	Plasma	RBBP8	0.332
9.77637e-162	0.622003	0.493	0.176	5.93504e-157	Plasma	CKAP2	0.317
1.96182e-160	0.542058	0.372	0.111	1.19098e-155	Plasma	MCM4	0.261
4.13737e-160	0.589946	0.414	0.127	2.51172e-155	Plasma	ESR1	0.287
1.05732e-159	0.882142	0.764	0.402	6.41876e-155	Plasma	ZBTB38	0.362
4.23345e-159	0.766666	0.518	0.204	2.57005e-154	Plasma	EDEM1	0.314
5.75748e-159	0.466392	0.463	0.16	3.49525e-154	Plasma	EXOSC9	0.303
2.41412e-158	0.382987	0.337	0.094	1.46556e-153	Plasma	CEP57L1	0.243
2.00885e-157	0.66625	0.605	0.251	1.21953e-152	Plasma	DBF4	0.354
3.68481e-157	0.551974	0.541	0.204	2.23698e-152	Plasma	MPHOSPH9	0.337
1.30595e-156	0.430628	0.506	0.182	7.92815e-152	Plasma	MRPL22	0.324
1.43767e-156	0.535367	0.547	0.213	8.72782e-152	Plasma	DNAJB11	0.334
1.58187e-156	0.747288	0.686	0.335	9.60319e-152	Plasma	SRP54	0.351
2.06283e-156	0.826512	0.645	0.28	1.2523e-151	Plasma	IRAG2	0.365
3.8101e-156	0.493278	0.437	0.146	2.31304e-151	Plasma	ATAD5	0.291
4.81143e-156	0.711259	0.507	0.192	2.92092e-151	Plasma	PRDX4	0.315
8.51221e-156	0.393209	0.456	0.154	5.16759e-151	Plasma	HAUS1	0.302
3.76665e-155	0.337925	0.449	0.144	2.28666e-150	Plasma	CKS1B	0.305
2.58625e-154	0.978212	0.793	0.48	1.57006e-149	Plasma	H2AZ2	0.313
6.73035e-154	1.00709	0.816	0.512	4.08586e-149	Plasma	RAN	0.304
1.37216e-152	1.40495	0.878	0.641	8.33012e-148	Plasma	SSR4	0.237
2.85936e-152	0.507238	0.536	0.191	1.73586e-147	Plasma	SIDT1	0.345
2.54881e-151	1.10601	0.656	0.335	1.54733e-146	Plasma	SEC24D	0.321
5.40611e-151	0.799816	0.792	0.477	3.28194e-146	Plasma	ATP5F1A	0.315
5.70812e-151	1.0296	0.525	0.214	3.46529e-146	Plasma	RP11-96H19.1	0.311
9.47264e-151	0.840479	0.649	0.313	5.75065e-146	Plasma	SELENOS	0.336
1.2394e-150	0.773907	0.749	0.391	7.52416e-146	Plasma	EPRS1	0.358
7.25744e-149	0.717503	0.683	0.327	4.40585e-144	Plasma	SELENOK	0.356
2.6378e-148	0.436751	0.44	0.153	1.60136e-143	Plasma	STT3A	0.287
4.42226e-148	0.502173	0.423	0.141	2.68466e-143	Plasma	SNX25	0.282
2.77158e-147	0.364738	0.578	0.217	1.68257e-142	Plasma	APOBEC3G	0.361
7.61688e-147	0.752186	0.874	0.615	4.62405e-142	Plasma	COX7A2	0.259
3.06279e-146	0.373142	0.436	0.146	1.85936e-141	Plasma	TMEM263	0.29
3.5645e-146	0.390679	0.337	0.098	2.16393e-141	Plasma	KIF22	0.239
6.78989e-146	0.35582	0.265	0.068	4.12201e-141	Plasma	RACGAP1	0.197
2.83244e-145	0.508948	0.42	0.143	1.71952e-140	Plasma	NCAPD3	0.277
1.55117e-144	1.2181	0.905	0.772	9.41682e-140	Plasma	HMGB1	0.133
4.40777e-144	0.569824	0.622	0.265	2.67587e-139	Plasma	IDH2	0.357
4.48777e-144	0.58609	0.322	0.092	2.72444e-139	Plasma	UBE2C	0.23
8.16761e-144	0.744963	0.841	0.536	4.95839e-139	Plasma	UQCRH	0.305
1.85963e-143	0.646545	0.439	0.158	1.12894e-138	Plasma	UAP1	0.281
2.70187e-142	0.394007	0.291	0.079	1.64025e-137	Plasma	SLC15A2	0.212
5.07118e-142	0.534155	0.615	0.267	3.07861e-137	Plasma	MMADHC	0.348
4.99056e-141	0.804965	0.605	0.284	3.02967e-136	Plasma	TMPO	0.321
5.25127e-141	0.486274	0.412	0.142	3.18794e-136	Plasma	YEATS4	0.27
3.15436e-140	0.400464	0.346	0.106	1.91495e-135	Plasma	FANCM	0.24
3.62452e-140	0.462234	0.468	0.172	2.20037e-135	Plasma	PI4K2B	0.296
4.8942e-140	0.42518	0.53	0.206	2.97117e-135	Plasma	SLC25A46	0.324
2.2082e-139	0.540407	0.371	0.121	1.34055e-134	Plasma	RFC3	0.25
3.36813e-138	0.878742	0.677	0.353	2.04472e-133	Plasma	NASP	0.324
3.13064e-137	0.712707	0.69	0.346	1.90055e-132	Plasma	BUB3	0.344
1.03819e-136	0.442723	0.639	0.254	6.30267e-132	Plasma	RASGRP1	0.385
1.1952e-136	0.556814	0.449	0.164	7.25579e-132	Plasma	KPNA2	0.285
1.23207e-136	0.843673	0.529	0.224	7.47967e-132	Plasma	ATAD2	0.305
1.74602e-136	0.603406	0.719	0.37	1.05997e-131	Plasma	ERH	0.349
5.29545e-136	1.06466	0.606	0.297	3.21476e-131	Plasma	ANKRD28	0.309
1.38763e-135	0.769883	0.883	0.694	8.42405e-131	Plasma	CHCHD2	0.189
1.82377e-135	0.343198	0.479	0.176	1.10717e-130	Plasma	DERL2	0.303
3.55781e-135	0.497063	0.514	0.205	2.15987e-130	Plasma	TFDP1	0.309
3.70329e-135	0.438316	0.405	0.14	2.24819e-130	Plasma	NCAPD2	0.265
4.0374e-135	0.336401	0.45	0.16	2.45103e-130	Plasma	EXOSC8	0.29
1.71987e-134	0.381606	0.259	0.068	1.0441e-129	Plasma	PSAT1	0.191
2.84174e-134	0.648238	0.456	0.175	1.72516e-129	Plasma	POLA1	0.281
4.15808e-134	0.611262	0.478	0.183	2.52429e-129	Plasma	CENPK	0.295
6.45868e-134	0.486371	0.564	0.235	3.92093e-129	Plasma	HSPB11	0.329
1.22808e-133	0.502488	0.492	0.188	7.45546e-129	Plasma	BARD1	0.304
4.79366e-133	0.587652	0.423	0.146	2.91013e-128	Plasma	LINC02384	0.277
9.98963e-133	0.559781	0.462	0.171	6.06451e-128	Plasma	ADAM19	0.291
5.32111e-131	0.40446	0.369	0.121	3.23034e-126	Plasma	MCM5	0.248
5.50155e-131	0.502692	0.579	0.248	3.33988e-126	Plasma	UCHL5	0.331
1.4132e-130	0.46996	0.346	0.11	8.57926e-126	Plasma	KIF18A	0.236
4.46645e-130	0.332369	0.472	0.175	2.71149e-125	Plasma	MRPS33	0.297
1.34503e-129	0.870726	0.708	0.386	8.16543e-125	Plasma	SMC3	0.322
1.47252e-129	0.66202	0.693	0.335	8.93934e-125	Plasma	OSBPL3	0.358
3.6825e-129	0.996501	0.777	0.445	2.23557e-124	Plasma	ST6GAL1	0.332
6.66088e-129	0.884907	0.774	0.476	4.04369e-124	Plasma	RPN2	0.298
6.99492e-129	0.723418	0.786	0.453	4.24647e-124	Plasma	SNRPG	0.333
7.16445e-129	0.342056	0.535	0.211	4.34939e-124	Plasma	SMARCB1	0.324
8.40056e-129	0.43292	0.419	0.15	5.09981e-124	Plasma	ITGB3BP	0.269
8.60275e-129	0.392441	0.405	0.143	5.22256e-124	Plasma	MTRR	0.262
6.19253e-128	0.365274	0.48	0.18	3.75936e-123	Plasma	ITGAE	0.3
7.53295e-128	0.480778	0.276	0.077	4.5731e-123	Plasma	CCNB1	0.199
9.86202e-128	0.384195	0.415	0.15	5.98704e-123	Plasma	CLPTM1L	0.265
1.73228e-127	0.727059	0.827	0.523	1.05163e-122	Plasma	ATP5MC3	0.304
1.80697e-127	0.684056	0.597	0.271	1.09697e-122	Plasma	MIR4435-2HG	0.326
5.78919e-127	0.355201	0.339	0.108	3.5145e-122	Plasma	PHF19	0.231
2.7918e-126	0.811336	0.525	0.233	1.69485e-121	Plasma	TCF4	0.292
1.39236e-125	0.363213	0.508	0.197	8.45273e-121	Plasma	PMS1	0.311
1.59411e-125	0.399439	0.288	0.084	9.67755e-121	Plasma	AURKA	0.204
4.67434e-125	0.506815	0.673	0.32	2.8377e-120	Plasma	MRPL51	0.353
5.69061e-125	0.518404	0.413	0.152	3.45466e-120	Plasma	PDK1	0.261
5.71433e-125	0.473212	0.609	0.277	3.46905e-120	Plasma	VDAC3	0.332
2.25992e-124	1.12217	0.804	0.552	1.37195e-119	Plasma	FNDC3A	0.252
3.35799e-124	0.762178	0.697	0.385	2.03857e-119	Plasma	SUZ12	0.312
9.16058e-124	0.368907	0.434	0.157	5.5612e-119	Plasma	PIGK	0.277
5.69447e-123	0.726119	0.664	0.352	3.457e-118	Plasma	SEC14L1	0.312
4.03289e-122	0.829669	0.487	0.212	2.44829e-117	Plasma	RALGPS2	0.275
5.37109e-121	0.406228	0.537	0.227	3.26068e-116	Plasma	ERGIC2	0.31
6.33685e-121	0.342058	0.516	0.205	3.84697e-116	Plasma	MRPS31	0.311
7.1368e-121	2.08295	0.724	0.527	4.33261e-116	Plasma	HMGB2	0.197
1.15023e-120	0.512926	0.624	0.292	6.98284e-116	Plasma	MPC1	0.332
2.98473e-120	0.490974	0.414	0.156	1.81197e-115	Plasma	DNAJB9	0.258
5.36533e-120	0.71133	0.72	0.371	3.25718e-115	Plasma	SAMD9L	0.349
8.65808e-120	0.356846	0.426	0.155	5.25615e-115	Plasma	HSH2D	0.271
9.20388e-120	0.372	0.5	0.201	5.58749e-115	Plasma	TMEM208	0.299
9.9475e-120	0.652336	0.791	0.469	6.03893e-115	Plasma	ATP5PF	0.322
2.03799e-119	0.660614	0.612	0.292	1.23722e-114	Plasma	IQCB1	0.32
2.37904e-119	0.481445	0.637	0.297	1.44427e-114	Plasma	LSM3	0.34
5.70985e-119	2.51894	0.77	0.523	3.46634e-114	Plasma	H4C3	0.247
5.43739e-118	1.29798	0.797	0.541	3.30093e-113	Plasma	HSPA5	0.256
1.46029e-117	0.462644	0.643	0.307	8.86513e-113	Plasma	MESD	0.336
1.79043e-117	0.364529	0.398	0.144	1.08694e-112	Plasma	NUDT1	0.254
3.44242e-117	0.426285	0.297	0.091	2.08982e-112	Plasma	CADM1	0.206
5.04151e-117	0.482548	0.435	0.171	3.0606e-112	Plasma	LMNB1	0.264
6.21125e-117	0.334103	0.503	0.202	3.77072e-112	Plasma	NUDT5	0.301
8.91821e-117	0.355091	0.415	0.152	5.41407e-112	Plasma	GPR89B	0.263
1.83764e-116	0.395664	0.483	0.19	1.1156e-111	Plasma	PAICS	0.293
1.91511e-116	0.575971	0.544	0.245	1.16262e-111	Plasma	ARFGAP3	0.299
2.03138e-116	0.520303	0.628	0.3	1.23321e-111	Plasma	GORASP2	0.328
4.57207e-116	0.506631	0.531	0.231	2.77561e-111	Plasma	ZNF92	0.3
5.57924e-116	0.42546	0.658	0.285	3.38704e-111	Plasma	RHOH	0.373
6.90255e-116	0.578023	0.72	0.394	4.1904e-111	Plasma	PSMA5	0.326
2.92922e-115	0.590531	0.817	0.497	1.77827e-110	Plasma	COX5A	0.32
3.87296e-115	0.789133	0.69	0.394	2.3512e-110	Plasma	USO1	0.296
6.99052e-115	0.366614	0.443	0.169	4.2438e-110	Plasma	NDUFAF6	0.274
2.24203e-114	0.524003	0.721	0.385	1.36109e-109	Plasma	PSMB2	0.336
[truncated: 5,049 more rows]

## Sheet: Supplementary Data 3
Supplementary Data 3. KEGG analysis of DEGs in MA and PBMC groups
Cluster	category	subcategory	ID	Description	GeneRatio	BgRatio	RichFactor	FoldEnrichment	zScore	pvalue	p.adjust	qvalue	geneID	Count
MA	Cellular Processes	Transport and catabolism	hsa04148	Efferocytosis	9/74	157/8546	0.0573248	6.62024	6.64246	7.55226e-06	0.00135909	0.00105707	5747/8754/19/713/5468/5879/100133941/712/714	9
MA	Human Diseases	Cardiovascular disease	hsa05417	Lipid and atherosclerosis	10/74	216/8546	0.0462963	5.3466	6.0469	1.5101e-05	0.00135909	0.00105707	5747/3329/3326/54205/19/3309/5468/6347/5879/3320	10
MA	Human Diseases	Cardiovascular disease	hsa05418	Fluid shear stress and atherosclerosis	8/74	141/8546	0.0567376	6.55243	6.21301	2.70899e-05	0.00162539	0.0012642	1514/5747/7295/3326/7422/6347/5879/3320	8
MA	Organismal Systems	Immune system	hsa04612	Antigen processing and presentation	6/74	81/8546	0.0740741	8.55456	6.38435	6.66602e-05	0.00299971	0.00233311	1514/1508/3326/3309/5641/3320	6
MA	Human Diseases	Infectious disease: bacterial	hsa05150	Staphylococcus aureus infection	6/74	102/8546	0.0588235	6.79332	5.50089	0.000239682	0.00810219	0.0063017	3875/3880/713/718/712/714	6
MA	Metabolism	Carbohydrate metabolism	hsa00010	Glycolysis / Gluconeogenesis	5/74	67/8546	0.0746269	8.61839	5.85069	0.000270073	0.00810219	0.0063017	3939/7167/2023/5315/2597	5
MA	Metabolism	Global and overview maps	hsa01230	Biosynthesis of amino acids	5/74	75/8546	0.0666667	7.6991	5.44576	0.000457433	0.0117626	0.00914867	7167/2752/2023/5315/2597	5
MA			hsa03272	Virion - Hepatitis viruses	4/74	48/8546	0.0833333	9.62387	5.59943	0.000755632	0.0170017	0.0132236	4072/928/967/1364	4
MA	Organismal Systems	Immune system	hsa04610	Complement and coagulation cascades	5/74	88/8546	0.0568182	6.56173	4.90113	0.000951685	0.0190337	0.014804	11326/713/718/712/714	5
MA	Human Diseases	Infectious disease: bacterial	hsa05132	Salmonella infection	8/74	251/8546	0.0318725	3.68084	4.02883	0.00139828	0.0251691	0.0195759	7295/3326/54205/6281/302/5879/3320/2597	8
MA	Environmental Information Processing	Signal transduction	hsa04370	VEGF signaling pathway	4/74	60/8546	0.0666667	7.6991	4.86653	0.00175127	0.0286571	0.0222888	3315/5747/7422/5879	4
MA	Human Diseases	Infectious disease: parasitic	hsa05142	Chagas disease	5/74	103/8546	0.0485437	5.60614	4.39528	0.00192362	0.0288543	0.0224422	713/718/6347/712/714	5
MA	Cellular Processes	Cellular community - eukaryotes	hsa04530	Tight junction	6/74	170/8546	0.0352941	4.07599	3.78591	0.00343801	0.0476032	0.0370247	56288/1364/5879/84612/7082/5584	6
MA	Cellular Processes	Cell motility	hsa04820	Cytoskeleton in muscle cells	7/74	232/8546	0.0301724	3.48451	3.58557	0.0038101	0.048987	0.038101	2335/4000/3696/2023/114793/481/1832	7
PBMC	Organismal Systems	Immune system	hsa04650	Natural killer cell mediated cytotoxicity	8/48	134/8546	0.0597015	10.6294	8.44342	6.59664e-07	0.000100269	8.54092e-05	2534/5579/3683/5880/919/3133/5551/3824	8
PBMC	Human Diseases	Cardiovascular disease	hsa05416	Viral myocarditis	5/48	70/8546	0.0714286	12.7173	7.39772	4.15676e-05	0.00214566	0.00182767	2534/3683/5880/3133/5551	5
PBMC	Organismal Systems	Immune system	hsa04670	Leukocyte transendothelial migration	6/48	116/8546	0.0517241	9.20905	6.69001	4.23485e-05	0.00214566	0.00182767	5579/3683/5880/3676/5908/5175	6
PBMC	Organismal Systems	Immune system	hsa04062	Chemokine signaling pathway	7/48	193/8546	0.0362694	6.45747	5.76324	9.03142e-05	0.00343194	0.00292333	5579/5880/1524/5908/5473/2268/1794	7
PBMC	Cellular Processes	Cellular community - eukaryotes	hsa04510	Focal adhesion	6/48	203/8546	0.0295567	5.26232	4.61903	0.000891228	0.0270933	0.0230781	2534/5579/5880/896/3676/5908	6
PBMC	Environmental Information Processing	Signal transduction	hsa04015	Rap1 signaling pathway	6/48	212/8546	0.0283019	5.03892	4.47532	0.00111658	0.0282868	0.0240947	5579/2533/3683/5880/5908/8631	6
PBMC	Environmental Information Processing	Signaling molecules and interaction	hsa04514	Cell adhesion molecules	5/48	160/8546	0.03125	5.5638	4.37953	0.00193227	0.0376831	0.0320985	3683/5788/3676/3133/5175	5
PBMC	Human Diseases	Immune disease	hsa05332	Graft-versus-host disease	3/48	45/8546	0.0666667	11.8694	5.4941	0.00199986	0.0376831	0.0320985	3133/5551/3824	3
PBMC	Organismal Systems	Immune system	hsa04666	Fc gamma R-mediated phagocytosis	4/48	99/8546	0.040404	7.1936	4.65831	0.00223124	0.0376831	0.0320985	5579/5788/5880/3635	4

## Sheet: Supplementary Data 4
Supplementary Data 4. Top 50 marker genes for T cell subsets in different studies
T01_CD4_Tn_CCR7	T02_CD4_Tcm_ANXA1	T03_CD4_Th1_TOX2	T04_CD4_Treg_FOXP3	T05_CD4_Temra_GNLY	T01_CD8_Tn_CCR7	T02_CD8_Tem/Trm_ITGA1	T03_CD8_Temra_CX3CR1	T04_CD8_MAIT_SLC4A10	NK	γδT
FHIT	ANK3	RP11-106M7.1	FOXP3	TRBV6-5	PTPRK	ITGA1	CD8A	SLC4A10	KLRF1	TRGV9
ANKRD55	FAAH2	RP5-1028K7.2	RTKN2	TRAV14DV4	NRCAM	ITM2C	PZP	ME1	AE000661.37	TRDV1
AK5	GREM2	TOX2	FANK1	RP11-206L10.17	NT5E	TNIP3	A2M	TRAV1-2	SH2D1B	TRGC1
SORCS3	RP11-537P24.1	ST8SIA1	IL2RA	TRAV21	SNTG2	APOBEC3H	TRGC2	LTK	NCAM1	IKZF2
TSHZ2	IL7R	LINC00892	HACD1	ZNF683	CLEC11A	DUSP4	MSC-AS1	LINC01644	FCER1G	KIR3DL2
IGF1R	CMTM8	ADAM19	CTLA4	LINC00892	NELL2	CD8B	CTB-91J4.1	ADAM12	LINGO2	KLRA1P
CA6	MB21D2	CCR4	F5	CD320	LINC02446	CXCR3	CD8B	SCART1	TYROBP	PZP
MDS2	SERINC5	LINC02694	HERC2P3	COL6A2	GLIS3	CD8A	PPP2R2B	RP11-678G14.3	CTBP2	A2M
TRABD2A	LTB	NPDC1	AC079610.1	C1orf162	CA6	TPRG1	FGFBP2	CCL20	BNC2	KIR2DS4
LEF1-AS1	TIAM1	ICOS	ICA1	PLXND1	NBEA	SLF1	PROK2	RORC	ATP8B4	AC079610.1
EDAR	CDC14A	LIMS1	STAM	RP11-511B23.2	S100B	KIAA0825	PLEK	TRBV7-9	NCR1	TRGC2
CCR7	FMN1	F5	IKZF2	FGFBP2	ACTN1	PMAIP1	TGFBR3	RP11-563D10.1	IGFBP7	KLRD1
TCEA3	PATJ	MAF	RP11-603B24.1	NDUFS7	CD8B	SKIL	FCRL6	KCNQ3	GFOD1	A2MP1
BACH2	SOCS3	LY96	CSF2RB	S100A9	RP11-61O1.1	LYAR	MVB12B	COLQ	RNF165	KLRG1
CALD1	ADAM19	PASK	LINC02694	RPL15P3	AIF1	IFNG-AS1	ZEB2	KIF5C	CXXC5	CCL4
PCSK5	PRKCA	COTL1	DLGAP1	LGALS1	YBX3	YBX3	NKG7	SCRN1	CD38	SGCD
IL6ST	MAL	CORO1B	TAFA2	HCST	FAM117B	EIF4EBP1	ITGAL	ELOVL4	LAT2	KLRC4-KLRK1
ACTN1	TCF7	CD28	RP11-563D10.1	SC22CB-1E7.1	LEF1-AS1	CLIC5	THEMIS	IL4I1	LINC00299	CST7
LEF1	LEF1	CTSL	TBC1D4	LINC02384	BACH2	PLP2	RAP1GAP2	DPP4	CLIC3	NKG7
RP11-61O1.1	INPP4B	ESR1	CDK14	ITGB1	TPST1	FN1	PTPRM	PLD1	SYK	TRG-AS1
PRKCQ-AS1	MAGI3	KIAA0825	SETD7	RPL26P19	CPNE2	CKAP2	LAIR2	ABCB1	AKR1C3	KLRC1
EDA	RORA	SGPP2	PIP5K1B	PFN1	DOCK3	SAMSN1	TRBV9	TLE1	KIR3DL1	AE000661.37
PARP11-AS1	BCL2	SMCO4	CCR4	PYROXD2	PCSK5	CXCR4	KLRG1	ABCA1	SPON2	LYAR
LINC01550	RASGRF2	PDCD1	SGPP2	GNLY	SPINT2	HLA-DRA	SYNE1	NEO1	HIPK2	FCRL3
MAL	PTPN13	CTSB	TTN	C12orf57	TRABD2A	GGA2	FLNA	CEBPD	ITGAX	SLAMF7
EPHX2	EGLN3	CD82	TIGIT	CD4	CCR7	CD2	SAMD3	IL12RB2	ZMAT4	DTHD1
TCF7	TRADD	EEPD1	IL7	UQCR10	SLC16A10	DZIP3	CX3CR1	RUNX2	PTGDR	GZMA
KANK1	CCR7	BICDL1	GCNT4	LAIR1	ICA1L	HLA-DQB1	HLA-DRB1	TMIGD2	CHST2	PIK3AP1
FAM153A	PVT1	TNFSF10	SLC16A10	LINC01871	SH3RF3	ST8SIA1	HLA-DPB1	CYTH3	L3MBTL4	HOPX
SULT1B1	AQP3	CD4	TNFRSF4	NKG7	PLAG1	DAPK2	GAB3	JAML	PTPN12	AOAH
NOSIP	AP3M2	P2RY10	PLCL1	PLEK	PSMA1	HMGB2	MYO1F	TRAV22	LDB2	GNLY
MAN1C1	CRIP2	RNASET2	MARCHF3	RPS26	LEF1	TNFAIP3	C12orf75	PERP	KLRC1	ZEB2
PLCL1	CAMK4	LINC00426	PELI1	CD52	CARMIL1	JAML	CST7	NCR3	MLC1	C1orf21
PRKCA	DGKA	CTLA4	C1orf112	FRY	PECAM1	RHOB	ARHGAP10	METTL24	CD300A	PLEK
CNKSR2	GNAQ	PVT1	MAST4	TSPO	LDLRAP1	ITGAE	LINC01505	CLIC5	IL2RB	CTSW
BEX3	SVIL	HNRNPLL	ZC3H12D	HSD17B10	CNKSR2	ITM2A	GZMA	HPGD	ZNF595	ABCB1
FAM117B	HIVEP2	SLAMF1	DUSP16	S100A4	RP11-563M4.2	P2RY10	FRMPD3	NRIP1	KLRD1	CCL3-AS1
CTD-2564P9.4	NR3C2	RNF214	RP11-106M7.1	S100A6	DNAH6	LGALS3	LINC01871	ZBTB16	LINC00298	PYHIN1
ITGA6	CSGALNACT1	LTB	HS3ST3B1	LAIR2	NUCB2	EPHA4	C1orf21	MYO1D	MCTP2	EPB41L4A
SLC40A1	BACH2	CD200R1	CPNE2	PAXX	ARMH1	PCNX2	ARHGAP26	SPON1	SIGLEC7	SAMD3
AIF1	ALOX5	TBC1D4	ADAM12	NDUFB9	NPM3	BICDL1	GRAP2	RP11-239H6.2	PLCG2	LINC01871
PRKN	SAMD12	CCDC167	CCDC22	CD3D	SCML1	NIBAN1	PRR5L	SLAMF1	HOPX	CX3CR1
ADTRP	MGAT5	MCF2L2	DUSP4	PRF1	CARS1	HLA-DQA1	HLA-DPA1	IL18R1	LYN	MYBL1
EPHA1-AS1	TSHZ2	PTPN13	DGKH	CST7	CD55	CD44	GNLY	CFH	ANKRD20A11P	PRF1
CERS6	TTC39C	ITM2A	NABP1	CTSW	TTTY14	CCSER2	PATL2	SIPA1L2	MYOM2	GZMM
SATB1-AS1	EDA	TRADD	CHST7	IFITM2	LINC02580	KIF20B	VCL	TNFSF13B	SLCO4C1	LINC00612
TMEM220	TAB2	CXCR3	ICOS	LTBP4	PRKCQ-AS1	CBLB	SETBP1	IKZF2	GNLY	GABARAPL1
RNF157	TESPA1	DNPH1	PHLPP1	PPP1CA	NOSIP	GZMA	NLRC5	PLXND1	CD160	C12orf75
LINC00402	UST	ZNRF1	CASK	ID2	UBE2E2	JHY	MIR4435-2HG	IFNGR1	RP11-121A8.1	DUSP2
SCML1	PAG1	ARID5B	HAPLN3	CORO1A	PRKN	PDE4B	PRF1	GYG1	PPM1L	SYNE1
The top 50 marker genes of the different cell types in this study
C01_CD8_Tn.LEF1	C02_CD8_Tcm.GPR183	C03_CD8_Temra.CX3CR1	C04_CD8_Temra.CX3CR1.RGS1	C05_CD8_Tem.GZMK	C06_CD8_Tem.CXCR5	C07_CD8_IEL.CD160	C08_CD8_Trm.CD6	C09_CD8_Trm.XCL1	c10_CD8_Trm.KLRB1	c11_CD8_Tex.LAYN	c12_CD8.HSPA1A	c13_CD8.MKI67	c14_CD8_MAIT.SLC4A10	c15_CD4_Tn.CCR7	c16_CD4_Tcm.ANXA1	c17_CD4_Temra.GNLY	c18_CD4_Temra.GNLY.RGS1	c19_CD4_Tn.TCF7	c20_CD4_Tfh.CXCR5	c21_CD4_Tem.GZMK	c22_CD4_Trm.CXCR6	c23_CD4_Th17.IL23R	c24_CD4_Th1.CXCL13	c25_CD4_Treg.FOXP3	c26_CD4_Treg.IL10	c27_CD4_Treg.CTLA4	c28_CD4_HSPA1A	c29_CD4_MKI67	c30_NKT.FCGR3A	c31_NKT.CD27	c32_gdT.TRDV2
RP11-291B21.2	RP11-291B21.2	GZMH	FGFBP2	GZMK	GZMK	LDLRAD4	XCL1	FCER1G	XCL1	CXCL13	HSPA6	STMN1	KLRB1	SELL	LTB	GNLY	GZMH	CCR7	GPR183	LMNA	LMNA	LGALS3	CXCL13	FOXP3	FOXP3	TNFRSF4	HSPA6	STMN1	GNLY	FXYD2	TRDV2
CD8B	SELL	NKG7	GZMB	CMC1	CCL4L2	KIR2DL4	CD8A	TYROBP	CCL4L2	GZMB	HSPA1B	TUBA1B	CCL20	LEF1	TXNIP	GZMH	FGFBP2	CD55	YPEL5	FOSB	ANXA1	CKLF	NR3C1	RTKN2	BATF	FOXP3	HSPA1A	TUBB	PTGDS	CD27	TRGV9
LEF1	NELL2	FGFBP2	NKG7	CCL5	CRTAM	KLRC2	XCL2	AREG	XCL2	DUSP4	HSPA1A	TUBB	CEBPD	TCF7	AQP3	FGFBP2	NKG7	SELL	FAAH2	FOS	FTH1	CAPG	IL6ST	AES	MIR4435-2HG	BATF	HSPA1B	TUBA1B	FGFBP2	NUCB2	TRDC
NELL2	CD55	GNLY	GZMH	CD8B	CCL4	TRDV1	RP11-291B21.2	XCL1	CCL4	GZMA	DNAJB1	TYMS	TRAV1-2	NOSIP	CD52	NKG7	GNLY	LYPD3	SLC2A3	ANXA1	S100A11	AC092580.4	NMB	SELL	IL2RA	TNFRSF18	DNAJB1	RRM2	TYROBP	ACTG1	KLRC1
SELL	CCR7	GZMB	GNLY	KLRG1	CD74	CD7	CD8B	CLIC3	DUSP2	CXCR6	IFNG	RRM2	NCR3	LINC00861	ITGB1	TRBV19	ITGB1	WDR74	PASK	TNFAIP3	VIM	CISH	GK	RCSD1	UCP2	CTLA4	HSPH1	TYMS	FCGR3A	LIMD2	KLRD1
TCF7	CD8B	CD8B	PRF1	GZMA	DUSP4	GZMA	JUN	CMC1	TUBA4A	VCAM1	ZFAND2A	MKI67	CD69	MAL	MAL	ITGB1	GZMB	YPEL5	ICOS	RGCC	CDKN1A	GPR25	TOX2	IL32	CTLA4	CARD16	ZFAND2A	HIST1H4C	SPON2	CAV1	NKG7
NOSIP	NDFIP1	ADGRG1	KLRD1	HLA-DPB1	HLA-DRB1	ITGA1	CCL5	KLRF1	CMC1	CCL5	BAG3	HMGB2	SLC4A10	FAM65B	AES	CX3CR1	CCL4	DCXR	CCR7	CDKN1A	CRIP1	ALOX5AP	SESN1	SAMHD1	TBC1D4	TIGIT	HSPB1	HMGN2	NKG7	SESTD1	CCL4
AIF1	LEF1	LGALS1	ADGRG1	HLA-DRB1	HLA-DRA	AREG	ITGA1	SH2D1B	NR4A2	RBPJ	HSP90AA1	HMGN2	IFNGR1	TXNIP	TRADD	CD52	CCL5	ARRDC2	SOCS3	KLF6	CCR6	S100A4	CTLA4	LDHB	GK	DUSP4	BAG3	HMGB2	GZMB	CNN2	KLRG1
ACTN1	ACTN1	CTSW	CST7	CD74	TUBA4A	KLRC3	LDLRAD4	IRF8	PIK3R1	HLA-DRA	HSPH1	HIST1H4C	IL7R	LDHB	LDHB	PLEK	CST7	ARID5A	WDR74	CXCR4	GPR183	CTSH	TIGIT	CD27	IL1R1	IL2RA	HSPD1	MKI67	PRF1	GZMK	CTSW
LDHB	AIF1	PLEK	CD8A	SAMD3	CD8A	CCL5	PPP1R15A	CD160	TRDV1	LAG3	NR4A1	UBE2C	NFKBIA	RPS3A	NOSIP	ADGRG1	ZEB2	SATB1	EZR	ZFP36	IL7R	CD40LG	FKBP5	TRAF3IP3	DNPH1	GK	NR4A1	UBE2C	S100B	HAVCR2	CST7
EEF1B2	RPS3A	KLRD1	ITGB1	HLA-DQA1	HLA-DQA1	JCHAIN	ITGAE	KLRD1	KLRD1	HLA-DRB1	HSPE1	CENPF	CCL3L3	RPS13	TIMP1	LGALS1	C1orf21	ABLIM1	SC5D	NFKBIA	TOB1	GZMB	ITM2A	TMSB10	LGMN	SAT1	HSPE1	TOP2A	GZMH	CD81	GZMK
RPS13	EEF1B2	FCGR3A	FCGR3A	HLA-DPA1	CST7	SLA2	FOSB	KLRC1	HLA-DQA1	HAVCR2	SERPINH1	HLA-DRA	SLC7A5	LDLRAP1	TRAF3IP3	S100A4	PRF1	RPS3A	FAM177A1	ZFP36L2	CCR7	TMIGD2	ICA1	SHMT2	CCR4	MAGEH1	HSP90AA1	NUSAP1	CTSW	GMFG	KLRB1
RPL32	RPS13	PRF1	CCL5	CD8A	ENC1	ENTPD1	ITM2C	LAT2	CCL3	HLA-DQA1	HSPD1	TOP2A	CCL4	NDFIP1	ARHGAP15	CD320	ADGRG1	S1PR1	JUNB	IL7R	RGCC	CD52	SRGN	FXYD5	ZC2HC1A	CCR8	CACYBP	H2AFZ	MYOM2	TMSB4X	CCL5
RPL22	RPS5	PRSS23	PRSS23	EOMES	DUSP2	ITGAE	CAPG	B3GNT7	CRTAM	ITGAE	HSPB1	NUSAP1	RORA	EEF1B2	GSTK1	FLNA	CD52	SARAF	SARAF	TSC22D3	EZR	CD2	SESN3	LTB	MAST4	LAIR2	DNAJB4	CENPF	CLIC3	BRD7	GZMA
RPS5	CD248	FLNA	C1orf21	NKG7	CXCR4	KLRC1	SMIM3	ADGRG3	CST7	RGS1	CACYBP	H2AFZ	BCL2A1	RPL22	FLT3LG	C12orf75	PRSS23	SESN3	ZNF331	MYADM	S100A10	SH3BGRL3	TOX	FCMR	IL1R2	TBC1D4	SERPINH1	KIAA0101	KLRF1	CD38	MATK
RPS12	RPL32	CX3CR1	CD8B	GIMAP4	HLA-DPA1	TMIGD2	ID2	SYK	ZEB2	CD8A	RHOB	ASPM	DUSP1	RPL32	EMP3	HOPX	S100A10	GPR183	SH3TC1	JUNB	TAGLN2	CXCR6	CD200	LEF1	ZC3H12D	PMAIP1	MRPL18	GAPDH	KLRD1	FCMR	GZMM
RPL5	RPS12	C12orf75	CTSW	HCST	RGCC	TRGV4	GPR15	GSTP1	HLA-DRB1	GZMH	DNAJA1	COTL1	GPR65	RPL5	TCF7	ITGB2	BHLHE40	FTH1	CMTM8	MCL1	MYADM	ANXA5	CORO1B	CD52	PBXIP1	AC133644.2	FKBP4	DUT	EFHD2	GYPC	TYROBP
RPS28	RPL22	EFHD2	ZEB2	DENND2D	HLA-DPB1	HOPX	KLRD1	CEBPD	RP11-291B21.2	LDLRAD4	CCL4L2	KIAA0101	KLRG1	TRAF3IP3	AHNAK	EFHD2	S100A4	SC5D	SRGN	GPR183	CREM	RBPJ	MAGEH1	IKZF2	ADTRP	IL32	RHOB	H2AFV	ADGRG1	IL10	PRF1
RPS23	RPS8	CD52	S1PR5	GZMM	SH2D1A	CD96	HOPX	NCR1	IFNG	CD63	DNAJB4	SMC4	NFKBIZ	RPS5	FAM65B	SH3BGRL3	C12orf75	FAAH2	CXCR5	PTGER4	GNA15	ACTB	RNF19A	IL2RA	CACYBP	LAYN	DNAJA1	PTTG1	CD247	PFN1	HCST
RPS8	RPS23	ITGB2	FLNA	CST7	LYST	KLRD1	CD7	CD7	CD8A	ALOX5AP	FKBP4	HMGB1	KDM6B	CTB-133G6.1	S100A4	AHNAK	GZMA	NDFIP1	PABPC1	NFKBIZ	ZFP36	COTL1	TIAM1	GSTK1	TNFRSF4	DNPH1	HSP90AB1	HMGB1	PRSS23	44080	CD300A
RPL34	RPL12	CD8A	ENC1	PTPRCAP	CD8B	RP11-277P12.6	CD96	IFITM3	ZNF331	PHLDA1	JUN	H2AFV	REL	EEF1G	FXYD5	MYOM2	S1PR5	PASK	ARID5A	TUBB4B	TNFAIP3	YWHAQ	TNFSF8	STAM	SAT1	CORO1B	HSPA8	HIST1H2AI	CST7	MPP1	DUSP2
RPS6	RPL5	ITGB1	C12orf75	PSMB9	CCL5	CD160	GZMB	CCL3	TMEM2	CTSD	HSPA8	DUT	FOS	ACTN1	TMEM256-PLSCR3	EMP3	HLA-DPB1	PABPC1	CREM	CSRNP1	ZFP36L2	GZMA	FBLN7	TTN	TNFRSF1B	ARID5B	JUN	TK1	TRBC1	RP5-1028K7.2	TRBC1
RPS14	RPS6	RP11-291B21.2	LITAF	ARPC5L	RNF19A	FAM3C	NR4A1	XCL2	SYTL3	HLA-DPA1	TNFSF9	GAPDH	ZFP36	RPL11	GIMAP7	PRSS23	SH3BGRL3	PTP4A1	AIM1	DNAJA1	PDE4B	LCP2	PDCD1	LIME1	AC017002.1	ACP5	DNAJA4	ASPM	HOPX	PGM2L1	CEBPD
RPL19	RPS14	FCRL6	CCL4	CD99	TNFSF9	SMIM3	HSPA1B	NKG7	GZMK	CTLA4	HSP90AB1	TPX2	MYBL1	EIF3E	RCSD1	SAMD3	SAMD3	SCML1	CCR4	CD69	BHLHE40	CD82	PGM2L1	CTB-133G6.1	AC133644.2	ICOS	ANKRD37	PFN1	PLEK	COTL1	HOPX
RPL35A	RPL13	CCL5	HLA-DPB1	RARRES3	HLA-DQB1	RGS1	ATF3	GZMK	HLA-DRB5	CD7	NEU1	PTTG1	TNFAIP3	RPS8	CDC25B	MYO1F	ANXA1	PHLDB3	GLIPR1	CRIP1	ADAM19	HLA-DRB5	PASK	GNB2L1	CTSC	STAM	UBB	HIST1H1B	TTC38	MYL6B	SLC7A5
RPL13	RPL19	ZNF683	S100A10	PYHIN1	NR4A2	RBKS	HSP90AA1	AOAH	CCL5	PDCD1	RGS2	CKS1B	CD83	RPL9	PLP2	SLC9A3R1	PLEK	TSHZ2	NR3C1	RGS1	PLK3	GADD45G	GEM	USP15	PHTF2	CTSC	ID3	ACTB	ITGB2	ISG20	LITAF
RPL18	RPL18	SYNE1	SH3BGRL3	ITGB2	CMC1	CD63	CCL4	FAM177A1	AOAH	CD8B	MRPL18	HIST1H1B	AQP3	RPS10	LIME1	TGFBR3	CD99	KLF2	USP36	LINC-PINT	AQP3	GAPDH	FYB	THEM4	ZNRF1	CD27	SOD1	BIRC5	CX3CR1	AFF3	REL
RPL14	RPL29	SAMD3	HLA-DRB1	CCL4L2	YBX3	GPR15	RHOB	CD38	FAM177A1	GAPDH	UBB	CCNA2	MT2A	TSHZ2	INPP4B	MYO1G	TGFBR3	AP3M2	DCXR	SERTAD1	AHNAK	SIT1	LIMS1	TMEM256-PLSCR3	TNFRSF18	TNFRSF9	CHORDC1	PKM	LGALS1	RAC2	GZMB
RPL12	RPL18A	KLRG1	CD99	PLEK	CLDND1	PLPP1	KLF6	S1PR5	VPS37B	ZNF683	PPP1R15A	CDK1	CD8A	RPS23	CTB-133G6.1	PRF1	HLA-DRB1	BACH2	BTG1	SAMSN1	LINC-PINT	PFN1	SMCO4	EMP3	CMTM6	MIR4435-2HG	DOK2	TPX2	S1PR5	POU2AF1	ALOX5AP
RPL11	CD8A	SH3BGRL3	LGALS1	KIAA1551	ITM2C	PTPN22	ANKRD28	KLRB1	ZFP36	GALNT2	CHORDC1	ACTB	FEZ1	AES	S100A11	SUN2	EFHD2	ACTN1	PGAP1	FAM46C	PLP2	MIR4435-2HG	ICOS	LIMD2	GBP2	PHLDA1	PPP1R15A	PCNA	IGFBP7	LYST	NCR3
RPL18A	YBX3	S100A4	B2M	LYAR	SRSF7	CAPG	DNAJB1	KRT86	NR4A3	PTMS	DNAJA4	BIRC5	CD160	TXK	TMEM123	C1orf21	SPON2	LEPROTL1	FYB	BHLHE40	KLF6	CTSC	CNIH1	GBP5	UGP2	SLAMF1	KLF2	SMC4	IFITM2	MT1E	GNLY
RPL30	NACA	TGFBR3	SELPLG	GZMH	SRRT	ATP8B4	UBC	TMEM2	FAM46C	LGALS3	AHSA1	TK1	ZC3H12A	RPL30	RP11-18H21.1	GZMB	FLNA	LEF1	LEPROTL1	PLK3	LGALS3	PKM	SNX9	EVL	FAS	SNX9	EGR1	CDK1	FCER1G	PECAM1	GZMH
EEF1G	RPL30	EMP3	BHLHE40	THEMIS	RGS1	FCER1G	HSPA1A	MAP3K8	GABARAPL1	CTSW	GZMK	CDKN3	CCR6	RPS12	THEM4	ITGAM	IER2	CHMP1B	FTH1	SLC2A3	PDE4D	TPI1	ARID5B	NCF4	CCR6	BTG3	AHSA1	CKS1B	FGR	HLA-DRA	HLA-B
RPL29	RPL11	C1orf21	SYNE1	AOAH	HLA-DRB5	AOAH	JAML	IL2RB	KLRC3	SLA2	DUSP1	PFN1	DUSP2	RPS6	CD40LG	GZMA	KLF3	FAM177A1	EIF1	FTH1	TIMP1	S100A6	NAP1L4	CDC25B	PIM2	RHBDD2	SOD2	MCM7	ZEB2	CHI3L2	ZBTB16
NACA	RPL14	HOPX	TMSB10	MYL12A	COTL1	MAP3K8	PTPN22	LYN	CCNH	SAMSN1	DOK2	DEK	NFKB1	RPL7	GPSM3	PFN1	ADRB2	RPS13	SCML1	JUN	CD44	ACTG1	C9orf16	TIGIT	LAG3	RTKN2	DNAJB6	CENPM	FLNA	LGALS3	MT-ND5
RPS25	RPL10A	ZEB2	RP11-291B21.2	TRAF3IP3	PIK3R1	GEM	MYADM	IFITM2	SH2D2A	CCL4	DEDD2	CDC20	ZBTB16	RPL34	S100A10	CCL5	ENC1	EEF1B2	STAT3	NR4A2	FOS	LINC00152	COTL1	EPB41	SLAMF1	HTATIP2	BTG2	HIST1H2AJ	C12orf75	PMAIP1	LYAR
EEF1A1	PDE3B	S100A6	KLF3	CORO1A	HNRNPLL	TNFRSF9	VIM	TLE1	GZMM	CD74	TCP1	CENPM	ERN1	TRABD2A	RPLP0	CST7	SELPLG	RPS5	GPCPD1	PDE4B	TNFRSF4	ITGAE	BTLA	EEF2	LIMS1	PKM	NEU1	ACTG1	CYBA	CSTB	PTMS
RPL10	RPL34	CST7	EFHD2	ZBTB38	FAM46C	GPR171	SYTL3	MCTP2	YPEL5	HLA-DPB1	CCL5	SMC2	CXCR6	C1orf162	IL7R	B2M	HLA-DRB5	CREM	ZFP36	JUND	CXCR4	IL26	FAAH2	S100A10	NAMPT	IKZF2	SAT1	CDT1	TRDC	ARHGDIB	IFNGR1
RPS15A	PASK	AHNAK	CD52	GIMAP7	TMEM2	TIGIT	TNFAIP3	REL	SRSF2	ACP5	UBC	COX8A	ADGRE5	RPS14	RPSA	CD99	SYNE1	PLAC8	AP3M2	PPP1R15A	TUBB4B	IL2RG	SOD1	CORO1B	TIFA	HPGD	ATF3	SLC25A5	GNPTAB	CD74	GABARAPL1
RPL10A	RPS18	TPST2	SPON2	BTN3A2	FABP5	LAYN	PDE4D	VPS37B	RUNX3	ENTPD1	CCL4	ZWINT	NINJ1	GIMAP1	CD82	S100A6	HLA-DPA1	RNF138	PPP1CB	S100A11	MCL1	RNF167	C1orf228	CCM2	CD2	RGS1	RGS2	TPI1	C1orf21	FABP5	S1PR5
RPL9	RPS27A	MYO1F	S100A4	APOBEC3G	YPEL5	MT-ND4	PGK1	PLCG2	IFRD1	PGK1	ATF3	CCNB2	MYADM	GIMAP7	EEF2	S1PR5	TMSB10	RPL32	CHMP1B	BTG1	CSRNP1	DPP4	TBC1D4	IL10RA	CCL20	PELI1	IER5	ENO1	FCRL6	SH2D1A	ADRB2
LDLRAP1	KLF2	FGR	TGFB1	TC2N	TRAT1	SYTL3	CD55	FOSL2	LITAF	COTL1	SOD1	DHFR	JAML	CCR7	RPL6	KLRG1	ITGB2	ALG13	AREG	CD44	ARL4A	LAPTM5	CD4	CORO1A	IL32	RBPJ	GADD45B	COTL1	APMAP	MT2A	PBX4
CCR7	RPS25	MYO1G	DSTN	CTSW	JMJD6	MT-ND2	GABARAPL1	SYTL3	DUSP5	TPI1	CMC1	CDT1	PRF1	RPL19	RPL36	MYL12A	LGALS1	NFATC1	SELK	DUSP2	S1PR1	S100A11	TSHZ2	SELPLG	LINC00152	ENTPD1	STIP1	CDKN3	TBX21	MT1F	APMAP
RPS21	RPL10	S1PR5	TNFRSF1B	HLA-DRB5	GZMA	GABARAPL1	ZFP36	TRDC	SLA2	SH3BGRL3	CLK1	CFL1	LST1	TMEM123	RPS18	FCRL6	KLRG1	EIF3E	CD28	YPEL5	LDHA	CD3D	TNFRSF4	S100A4	SYNGR2	UGP2	NUDC	TMPO	BIN2	UBE2E2	DTHD1
RPS10	RPL9	BIN2	ADRB2	PPP1R18	NR4A3	CBLB	CLDND1	MATK	HLA-DPB1	AC069363.1	ANKRD37	HIST1H2AJ	TTC39C	SH3YL1	RPL14	MT-ND5	EMP3	KLF3	ANKRD12	SRGN	PIM1	CAPZB	NINJ2	UCP2	HSPA1A	TMEM173	TCP1	COX8A	TPST2	S1PR4	SAMD3
RPS18	RPS10	SLC9A3R1	CYBA	PFN1	EZR	SYTL2	ANXA1	NCAM1	BRD2	LSP1	CST7	CENPE	PARP8	RPL18	RPL4	S100A10	AHNAK	RPL22	RHOH	DUSP1	CD55	EVL	METTL8	ITGB1	ARPC1B	FBLN7	DEDD2	ASF1B	MATK	CORO1A	CD247
RPS3A	EEF1G	IFITM2	HLA-DPA1	TXNIP	ZNF331	LYN	TSPYL2	NR4A2	CTSW	CD3D	DYNLL1	ASF1B	PFKFB3	NACA	HINT1	TMSB10	P2RY8	EEF1G	NR4A2	H3F3B	SLC2A3	CLIC1	LRRC8D	S1PR4	MAF	ICA1	BCAS2	CCNA2	PLAC8	ZBTB32	PLEK
RPS27A	ABLIM1	TBX21	P2RY8	NDUFB10	NFATC2	TSPYL2	AC092580.4	APMAP	SRSF7	NDFIP2	TNFSF14	PPIA	HPGD	RPL29	RPL11	AES	RAP1B	RGS10	RANBP2	EIF1	LTB	CAP1	TNIK	SKAP1	FKBP1A	GLRX	NABP1	RANBP1	ABHD17A	S100A10	FLNA
RPL39	LDHB	HCST	ITGB2	LCK	SLA	ZEB2	PTGER4	MAFF	CD74	FKBP1A	XCL2	PKMYT1	TMIGD2	RPL4	RPS8	HLA-C	HOPX	LDHB	CYCS	BTG2	PER1	CTSD	ELMO1	GMFG	ARID5B	GBP2	MXD1	DEK	MYO1F	ANXA2	MYBL1
LRRN3	BACH2	MATK	TUBA4A	SLAMF6	NAA50	RANBP2	CD63	PIK3R1	ZFP36L2	LAYN	CYCS	CASC5	CCDC107	FOXP1	EEF1G	BIN2	TBX21	RPS8	RPL9	VIM	SAMSN1	RBL2	RNASET2	CCR4	PELI1	SYNGR2	CD40LG	FABP5	CD300A	ARPC2	CD160
The top 50 marker genes of different cell types in Zhang et al. study
CD4T_01_CCR7	CD4T_02_SELL	CD4T_03_GPR183	CD4T_04_BAG3	CD4T_05_CD69	CD4T_06_PLCG2	CD4T_07_CXCL13	CD4T_08_STMN1	CD4T_09_FOXP3	CD4T_10_FOXP3_CTLA4	CD4T_11_FOXP3_STMN1	CD8T_01_CCR7	CD8T_02_CX3CR1	CD8T_03_GZMK_S1PR1	CD8T_04_GNLY	CD8T_05_KLRD1	CD8T_06_CD69	CD8T_07_PLCG2	CD8T_08_GZMK	CD8T_09_PDCD1_IFNG	CD8T_10_PDCD1	CD8T_11_SLC4A10	CD8T_12_IFIT3	CD8T_13_STMN1
IL7R	IL7R	IL7R	HSPA6	CD69	IL7R	CXCL13	STMN1	TRAC	TNFRSF4	TNFRSF4	CD8B	GZMH	GZMK	GZMH	CRTAM	GZMK	GZMK	APOA2	CXCL13	TNFRSF9	KLRB1	FDCSP	STMN1
LTB	CCR7	ANXA1	DNAJB1	IL7R	CD2	DUSP4	HMGB2	CD52	TNFRSF18	TNFRSF18	NOSIP	FGFBP2	CD8B	NKG7	SYTL3	TUBA4A	CCL5	GZMK	LAG3	CD8A	IL7R	IFI44L	HMGB2
RPS10	WDR74	LTB	HSPA1B	CD40LG	CD40LG	NMB	TUBA1B	TRBC2	BATF	BATF	LDHB	TRGC2	IL7R	FGFBP2	ZFP36L2	DUSP2	CD8A	ALB	CD8A	DUSP4	RORA	DEFB1	MKI67
GIMAP7	CNOT6L	CXCR4	HSPA1A	LTB	LTB	ITM2A	MKI67	IL32	TIGIT	IL2RA	TCF7	NKG7	LYAR	GZMB	PIK3R1	CD8A	CD2	APOA1	CCL5	CREM	LTB	CD2	CXCL13
LDHB	SC5D	CCR6	HSP90AA1	CD2	CD3D	TNFRSF4	TUBB	LTB	IL32	STMN1	RPS12	GNLY	CCL5	GNLY	GZMK	CCL5	CD3D	CD8A	IFNG	CCL5	SPOCK2	IL7R	CENPF
RPS12	SARAF	SPOCK2	CACYBP	TRAC	TRAC	CD2	TOP2A	CD3G	LTB	PTTG1	CCR7	GZMB	KLRG1	TRGC2	CRYBG1	CD3D	GZMA	TRAC	DUSP4	ITM2A	AQP3	RSAD2	TYMS
TCF7	YPEL5	CD2	IL7R	TNFAIP3	CD52	NR3C1	CENPF	TRAF3IP3	CTLA4	HMGB2	LEF1	KLRG1	TRAC	KLRD1	CNOT6L	CD8B	CD8B	APOC3	CD27	TIGIT	CCR6	IFIT1	TOP2A
RPL34	RPL13A	CD3D	HSPH1	CD3D	CD3G	SPOCK2	TYMS	LDHB	FOXP3	MKI67	RPL32	CD3G	GZMM	PRF1	DUSP2	CST7	CD3G	RBP4	TNFSF9	RGS1	NCR3	MX1	PCLAF
RPL30	PGAP1	ZFP36L2	HSPE1	ICOS	RPS29	TNFRSF18	NUSAP1	CD3D	ICOS	DUSP4	RPS4X	CD52	CD3E	CST7	TUBA4A	CXCR4	IL32	CCL5	NKG7	CD3D	CD8A	ISG15	TUBA1B
RPL32	AP3M2	CREM	HSPD1	CD3E	ACAP1	TRAC	DUT	RTKN2	TRAC	TIGIT	RPS3A	PRF1	GIMAP7	CCL5	KLRD1	SRSF7	TRAC	APOH	PDCD1	CD8B	GZMK	OASL	HMGN2
RPS21	RPL9	SARAF	ZFAND2A	BTG1	RPS27	BATF	PCLAF	CD3E	DUSP4	TUBB	RPL5	CCL5	CD3G	CD3G	TSC22D3	JUND	GZMH	TTR	TNFRSF9	NKG7	KLRG1	CD3D	ASPM
RPS27	ZNF331	LEPROTL1	CD2	JUND	IL32	TIGIT	HMGN2	SLFN5	IL2RA	TRAC	EEF1B2	CD3D	RPS10	CD3D	CXCR4	CD3E	CD3E	AMBP	CD8B	CLEC2D	SLC4A10	IFI6	CD8A
RPL5	RPS20	RPS27	HSPA8	IL32	TNFRSF25	CD3D	PCNA	GIMAP7	CD27	CTLA4	RPL30	KLRD1	TRBC2	GZMM	CEMIP2	ZFP36L2	TRBC2	CD3D	TRAC	CXCL13	CXCR6	TRAC	NUSAP1
RPS15A	RPS4X	BTG1	BAG3	ANXA1	CD3E	ICOS	H2AFV	LEF1	TNFRSF9	ICOS	RPS13	HCST	NKG7	CTSW	FAM177A1	BTG1	ACAP1	IL32	GZMB	LAG3	CD3D	HERC5	DUSP4
RPS8	RPS6	EZR	CD3D	SPOCK2	TRBC2	CTLA4	ASPM	CD27	CD2	IL32	RPS5	CST7	TXNIP	S1PR5	CCL5	IL32	THEMIS	CD8B	TRBC2	CD27	CD3E	CD69	UBE2C
RPS3	BTG1	CD3E	IL32	RORA	CISH	TSHZ2	H2AFZ	S1PR4	SPOCK2	HMGN2	RPL14	GZMM	CD3D	KLRG1	CD8A	GZMM	ZNF683	CD3E	CD3D	TRBC2	GPR171	XAF1	PTTG1
RPS25	RPL21	RPS29	CD52	ZFP36L2	OXNAD1	BICDL1	CKS1B	LCK	TBC1D4	FOXP3	RPL34	TRBC2	HCST	SPON2	KLRB1	CD2	HCST	GZMA	CD2	CXCR6	CD69	ISG20	ITM2A
RPL14	EEF1B2	RORA	HSP90AB1	BICDL1	SPOCK2	PDCD1	UBE2C	ETS1	LAIR2	TUBA1B	LTB	CX3CR1	CD8A	IFNG	CCL4	TRBC2	PTPRC	CD2	TIGIT	TRAC	CXCR4	LY6E	DUT
RPS27A	RPL7	GPR183	HSPB1	RGCC	CD6	IGFL2	DEK	AQP3	LAYN	CORO1B	RPL19	SAMD3	RPS27	SAMD3	RGS1	RGCC	CD52	CD3G	CD7	CST7	IL32	SPOCK2	H2AFZ
RPS14	TCF7	TRAC	DNAJA1	SRSF7	AAK1	TNFRSF25	TPX2	SKAP1	RTKN2	PCLAF	RPS8	GIMAP7	RPS29	ANXA1	FYN	TRAC	TC2N	TRBC2	BICDL1	CD7	TRAC	IFI44	PCNA
RPS29	RPL3	TRAT1	JUND	KLF6	SIT1	TRBC2	PTTG1	RCAN3	CD3D	TOP2A	RPS3	CD3E	IL32	ARL4C	CCNH	CD69	GZMM	ORM1	GZMH	ICOS	STAT4	CLEC2D	SMC4
RPL11	RPS3	CCR7	TNFSF14	TRBC2	KLRB1	CD200	ANP32B	EPB41	CXCR6	PKM	RPS14	IL32	RPS12	IL32	BTG1	CD3G	TRGC2	FGA	HSPA1B	CD2	TNFAIP3	IFIT3	HMGB1
RPL35A	RPL13	TNFAIP3	DNAJA4	KLRB1	LCK	CD6	ANP32E	FCMR	IKZF2	NUSAP1	RPS10	CTSW	RPS15A	PPP2R5C	RNF125	YPEL5	EVL	HP	OASL	CTLA4	BTG1	HSP90AA1	IFNG
RPS28	BICDL1	RGCC	UBC	CXCR4	EVL	CD3E	PLP2	LAT	TRBC2	DUT	RPL13	C12orf75	TRAF3IP3	HCST	RUNX3	CREM	GPR174	FGB	HAVCR2	PDCD1	TRGC2	RNF213	H2AFV
RPL19	PABPC1	LMNA	CD69	DNAJB1	GOLGA8A	TRAT1	SMC4	RASGRP1	CD3E	CENPF	RPS28	LYAR	CST7	C12orf75	SRSF7	BICDL1	DTHD1	AHSG	ITM2A	BICDL1	TRBC2	CCL20	LAG3
RPL13	RPS12	TSC22D3	UBB	DUSP2	TBC1D10C	ARID5B	RRM2	BCL11B	ARID5B	PCNA	RPS23	TRAC	RPS3	CD3E	YPEL5	ZNF331	CD96	TRGC2	DNAJB1	CD3G	PDE4D	HSPA1B	CD3D
RPL39	RPS3A	STAT4	DNAJB4	TSC22D3	IKZF1	MAF	IL7R	RPS15A	IL7R	ENO1	RPS6	PATL2	RPS21	SYTL3	CST7	LEPROTL1	SAMD3	CD27	CLEC2D	ZNF331	CCL20	EIF2AK2	TRAC
RPS6	LTB	ICOS	DOK2	JUN	TC2N	CLEC2D	ATAD2	CD2	STAM	PMAIP1	RPL11	CD8B	SAMD3	CD8A	LEPROTL1	EZR	GIMAP7	TF	HSPA1A	RNF19A	IL4I1	JUND	TPX2
RPS4X	PIK3IP1	FAM177A1	FKBP4	HSPA8	TRBC1	SH2D1A	DNAJC9	SELL	S100A4	SPOCK2	RPL18	TRAF3IP3	TRGC2	CD247	ZNF331	RUNX3	SIT1	FGG	HSP90AA1	CD3E	MYADM	STAT1	CORO1A
EEF1B2	RPS14	YPEL5	IFNG	JUNB	GOLGA8B	KLRB1	RAN	FOXP3	PBXIP1	TYMS	RPS27A	GZMA	LCK	CD52	CD69	FYN	SLFN12L	VTN	CACYBP	SYTL3	SLC7A5	DNAJB1	TMPO
RPS13	RPL31	TRBC2	JUN	TENT5C	TRAF3IP3	RNF19A	SMC2	PIM2	RGS1	CD2	RPS25	HOPX	CD2	ADGRG1	AKNA	PPP2R5C	RNF213	CST7	DUSP2	SH2D2A	MYBL1	LTB	CKS1B
RPL36	EZR	CD52	PPP1R15A	TRBC1	N4BP2L2	IL32	BIRC5	SELPLG	CORO1B	H2AFZ	RPS15A	CD2	RPL14	PYHIN1	STAT4	TENT5C	APOBEC3G	LCK	PRRG4	CRTAM	GPR65	OAS3	CLSPN
MAL	RNF125	KLRB1	CHORDC1	DNAJA1	BCL2	SOD1	GAPDH	GBP5	P2RY10	ASPM	GIMAP7	FCRL6	RPL30	KLRF1	PTPN22	UBE2S	IKZF1	ITM2A	HSPE1	VCAM1	ODF2L	KRT18	SMC2
RPS5	KLF2	SC5D	TSPYL2	MYADM	CD96	RBPJ	CDK1	RPS10	DNPH1	CD27	RPL35A	MYBL1	GZMA	PLAC8	TRGC2	RNF19A	PYHIN1	CD69	SRSF7	SRSF7	PDCD4	HSPE1	RRM2
NOSIP	FAM177A1	JUND	DEDD2	FOSB	LAT	RGS1	CLSPN	PBXIP1	PHLDA1	RANBP1	CD3E	ADGRG1	RPL41	CD69	SARAF	CRTAM	TBC1D10C	CYP2E1	RGS1	PTPN22	ANXA1	DNAJA1	H2AFX
RPL37	NOP53	ARL4C	RGCC	IFNG	GIMAP7	RHOH	CENPM	GSTK1	CARD16	GAPDH	RPSA	PYHIN1	CTSW	RORA	CD3D	DUSP4	IKZF3	DUSP2	TTN	METRNL	DUSP2	SAMD9	CD8B
RPSA	SESN3	CD44	AHSA1	BTG2	BCL11B	CREM	MCM7	RPS27	PMAIP1	LTB	RPL22	MYOM2	RPS14	ZEB2	TENT5C	RGS1	N4BP2L2	SRSF7	HSPD1	JUND	G3BP2	SP100	GAPDH
RPL22	HSPH1	RNF125	SRSF7	TNF	RNF213	BIRC3	SPOCK2	ARHGDIB	BIRC3	DNPH1	RPL10	S100A4	RPS28	ABHD17A	GZMM	PIK3R1	TRBC1	FABP1	HSPA6	TRGC2	ARL4C	JUN	CDKN3
TRAC	RGCC	TENT5C	IER5L	TSPYL2	EMB	ZNF331	RPA3	S100A4	IL2RG	TNFRSF9	CD3G	RPS27	RPL34	LYAR	PARP8	STAT4	OXNAD1	EVL	HSPH1	YPEL5	JUND	IFIT2	RAN
CD3G	LEPROTL1	EML4	ANXA1	HSPA1B	FAM102A	RGCC	TMEM106C	LIMD2	TRBC1	CORO1A	EEF1A1	LCK	RPS27A	KLF2	PPP2R5C	RHOH	KLRG1	TUBA4A	BAG3	LEPROTL1	ZFP36L2	EPSTI1	CENPM
RPS23	CREM	TUBA4A	SERPINH1	KLF2	OCIAD2	DUSP2	RANBP1	EVL	CTSC	UBE2C	RPL10A	TXNIP	RPS25	AKNA	ETS1	IFNG	PTPN7	CRTAM	HSPA8	CNOT6L	PBXIP1	TRIM22	TRBC2
LEF1	HSPD1	IDS	CGAS	APOC3	PTPN7	TRBC1	TMPO	UCP2	CREM	RAN	RPL29	CD8A	RPL39	TRBC1	METRNL	SRSF2	TRAF3IP3	IFNG	CHORDC1	GZMB	YPEL5	SOCS1	TNFRSF9
RPL6	KLF3	CRYBG1	NEU1	NEU1	SYNE2	RORA	HMGB1	CORO1A	SOD1	ANP32B	RPL6	PPP2R5C	RPL26	TSC22D3	GABARAPL1	TRBC1	AAK1	CXCR4	DOK2	CEMIP2	TGFB1	RGCC	KIF20B
RPL3	ARL4C	PDE4D	NR4A1	TTR	DGKA	FAM107B	CRIP1	AAK1	BTG3	TK1	RPL3	BIN2	GIMAP4	DUSP2	CMC1	CNOT6L	ARAP2	TRBC1	JUN	DUSP2	EZR	ANXA1	APOBEC3G
CD3E	ANKRD12	MYADM	MRPL18	HP	TMC8	AHI1	UBE2S	PCSK7	CLEC2D	SMC4	IL7R	SYNE1	GZMH	RUNX3	DDX24	FAM177A1	ITM2C	RGS1	ZFAND2A	EZR	CREM	SAMD9L	TUBB
RPS18	HSP90AB1	CNOT6L	TNF	TF	ATM	SESN3	HIST1H4C	GIMAP4	GADD45A	RRM2	RPS18	IKZF1	CMC1	BPGM	TRBC1	XCL2	RBL2	ZFP36L2	TSPYL2	RGCC	REL	PPM1K	GZMB
RPL18	ZFP36L2	CRIP1	IER5	APOA1	NKTR	HSP90AA1	CD69	FYB1	GBP2	PFN1	CD27	ABHD17A	CD52	TUBA4A	CREM	ANXA1	PLCG2	DUSP4	FKBP4	LYST	SATB1	TSPYL2	DEK
TRBC2	HSPE1	TRBC1	ANKRD37	APOA2	TNF	CACYBP	LTB	FXYD5	CYTIP	TPX2	TRBC2	RPS10	PPP2R5C	DOK2	ZFP36	EML4	NKTR	LTB	DNAJA4	AHI1	FAM177A1	RGS1	UBE2S
RPL41	CRYBG1	G3BP2	TNFSF9	AMBP	PCSK7	CORO1B	DUSP4	TRBC1	CACYBP	ANP32E	RPL37	IFITM1	RPL17	CMC1	RNF19A	TSPYL2	APOBEC3C	RNF19A	IER5L	HAVCR2	TSC22D3	IFNG	HIST1H4C
RPL36A	HSP90AA1	RPS26	CCL20	ALB	RBL2	GEM	CXCL13	ITGB1	UGP2	HIST1H4C	RPS27	PRMT2	RPL36A	HSPA6	IL7R	METRNL	PCSK7	TNFSF9	SERPINH1	TRBC1	TUBA4A	NEU1	RGS1
The top 50 marker genes of different cell types in Zhang et al. study
CD4_c0_Tcm	CD4_c1_Treg	CD4_c10_Tn_LEF1_ANKRD55	CD4_c11_Tisg	CD4_c2_Tn	CD4_c3_Tfh	CD4_c4_Tstr	CD4_c5_CTL	CD4_c6_Tn_FHIT	CD4_c7_Tn_TCEA3	CD4_c8_Tf17	CD4_c9_Tn_TCF7_SLC40A1	CD8_c0_t-Teff	CD8_c1_Tex	CD8_c10_Teff_CD244	CD8_c11_Teff_SEMA4A	CD8_c12_Trm	CD8_c13_Tn_TCF7	CD8_c2_Teff	CD8_c3_Tn	CD8_c4_Tstr	CD8_c5_Tisg	CD8_c6_Tcm	CD8_c7_p-Tex	CD8_c8_Teff_KLRG1	CD8_c9_Tsen
ANXA1	FOXP3	ANKRD55	ISG15	NBEAL1	CXCL13	HSPA6	GZMA	FHIT	TCEA3	GNLY	SLC40A1	LMNA	CXCL13	CD244	SEMA4A	ITGA1	NHSL2	FGFBP2	LTB	HSPA6	ISG15	DKK3	CHI3L2	LGR6	KLRC4
LMNA	IL2RA	LEF1	IFI6	CCR7	NMB	HSPA1A	CCL5	ADTRP	NOSIP	SLC1A4	TCF7	ZFP36	GZMB	KLRG1	LMNA	CPNE7	TCF7	GNLY	SELL	HSPA1A	IFI6	CLDND1	FABP5	FGFBP2	PLCG2
VIM	TNFRSF4	TCF7	IFI44L	GLTSCR2	PDCD1	HSPA1B	CCL4	GLTSCR2	TCF7	CTSH	NOSIP	RGCC	HAVCR2	PTPRCAP	TMEM66	TXNIP	NACA2	GZMH	LEF1	HSPA1B	MX1	TRAT1	PTPRCAP	PLEK	IGKC
KLRB1	TIGIT	NOSIP	MX1	TCF7	FABP5	DNAJB1	GZMH	EIF3E	LEF1	CXCR6	LEF1	CXCR4	KRT86	EEF1A1P5	EEF1A1P5	IL7R	C6ORF48	CX3CR1	NOSIP	DNAJB1	IFI44L	SARAF	ACTG1	CX3CR1	EEF1A1P5
IL7R	CARD16	SELL	IFIT3	GNB2L1	ITM2A	HSPH1	NKG7	NOSIP	MAL	LGALS3	MAL	DUSP2	CCL3	PLEK	GZMK	H1FX	RACK1	S1PR5	EIF3E	HSPH1	IFIT3	LDHA	CD27	S1PR5	KLRK1
ZFP36	TNFRSF18	IL6ST	IFIT1	SELL	LAG3	HSP90AA1	HOPX	SELL	C1orf162	PLIN2	SELL	ZFP36L2	ENTPD1	LIME1	JUND	TMEM173	SELL	SPON2	CCR7	HSP90AA1	IFIT1	ITM2C	CD38	SPON2	KLRC4-KLRK1
ZFP36L2	BATF	LDLRAP1	RSAD2	C6orf48	CD200	HSPE1	GZMB	C6orf48	LDLRAP1	JAML	C1orf162	JUND	VCAM1	DENND2D	HLA-H	ETS1	C12ORF57	FCGR3A	EEF1B2	BAG3	RSAD2	DUSP2	CAV1	ADGRG1	TMSB4XP8
GPR183	CTLA4	RIPOR2	STAT1	TMEM66	TOX2	HSPB1	LGALS1	DONSON	FLT3LG	KLRB1	LDLRAP1	XCL1	LAG3	SLC9A3R1	PTPRCAP	PIK3IP1	TPT1	PLEK	MAL	HSPD1	OAS1	MLLT3	CNN2	FCRL6	HSPA1B
CXCR4	RTKN2	FYB1	MX2	EEF1B2	GNG4	BAG3	ALOX5AP	TCF7	EIF3E	IL17F	FLT3LG	GZMK	TNFRSF9	SASH3	TMSB4XP8	ERN1	GLTSCR2	ADGRG1	GLTSCR2	HSPE1	IFI27	ATP6V0C	DENND2D	RIPOR2	HLA-H
RGCC	IL32	TRABD2A	OAS1	LEF1	TIGIT	HSPD1	GZMK	LEF1	RASGRP2	IL17A	KLF2	FTH1	CTLA4	CMC1	C6orf62	BCL11B	LEF1	FCRL6	AIF1	HSPB1	IFI44	GGA2	PFN1	PAXX	C1orf56
FTH1	PMAIP1	ATM	LY6E	TOMM7	NR3C1	DNAJA1	CXCR6	CCR7	AES	HSP90AA1	EEF1G	GPR183	CCL4L1	PSMB10	CD97	KLRB1	CCR7	PLAC8	GNB2L1	SERPINH1	XAF1	TRMO	HLA-DRA	KLRG1	NPIPB4
MYADM	SAT1	C1orf162	XAF1	EEF1G	SH2D1A	HSP90AB1	CST7	AIF1	SELL	BHLHE40	TRABD2A	PIK3R1	RBPJ	IFITM1	RGCC	TRBC1	TRABD2A	EFHD2	S100B	ZFAND2A	MX2	GPR183	UCP2	FCGR3A	KIAA1551
FOS	CTSC	TXNIP	SAMD9L	EIF3E	SMCO4	JUN	HLA-DRB1	GNB2L1	AIF1	CCL20	SORL1	NR4A2	TIGIT	IGKC	MATR3	PRDM1	LTB	KLRD1	C6orf48	CACYBP	STAT1	CST7	HLA-DMA	FGR	C6orf62
AHNAK	TNFRSF9	MCUB	OAS3	GIMAP1	CHI3L2	NR4A1	HLA-DRB5	PLAC8	PLAC8	HSPA8	RASGRP2	JUNB	RGS1	TMSB4XP8	SMG1P1	CDV3	ACTN1	HOPX	EEF1A1	HSP90AB1	OAS3	OAZ1	LAT	SELENOW	HSPA1A
PTGER4	TBC1D4	TXK	EIF2AK2	NOSIP	TOX	FKBP4	GLUL	EEF1B2	DONSON	ALOX5AP	AES	MYADM	TNFRSF18	TPST2	NPIPB4	JAML	NBEAL1	ITGB1	LDHB	FKBP4	EPSTI1	CREM	CD74	ATP5MC2	H3F3AP4
JUND	MAGEH1	CCR7	IFI44	UBA52	ICA1	HSPA8	RBPJ	TRABD2A	TRABD2A	SPOCK2	ATM	XCL2	PDCD1	PTPN6	FOSB	GNAI2	AES	KLRG1	TCF7	HSPA8	SAMD9L	CMC1	LIMD2	KLRF1	NKTR
TNFAIP3	IKZF2	SCML4	HERC5	FAM65B	CAV1	ZFAND2A	HLA-DPA1	MAL	GLTSCR2	S100A4	INPP4B	FOS	IFNG	NKG7	C17orf76-AS1	TRAC	LDLRAP1	NKG7	TMEM123	DNAJA1	HERC5	CYSTM1	COTL1	SLC9A3R1	PIP4K2A
KLF2	TNFRSF1B	ARHGAP45	EPSTI1		PTPN13	SERPINH1	XCL1	TSHZ2	LDHB	RBPJ	CD48	YPEL5	ACP5	LAT	KLRK1	DDX17	MAL	FGR	ACTN1	NR4A1	EIF2AK2	FAM177A1	ACTB	ATP5F1B	NLRC5
GPR171	LAYN	RASGRP2	ISG20		PTPRCAP	FOSB	ATP5F1E	TXK	ADD3	PKIG	CCR7	FOSB	LAYN	ARPC5L	GIMAP5	EAPP	BCL11B	S100A4	TPT1	DNAJB4	IFIT2	CCR7	GZMK	ATP5PB	NPIPB5
S100A10	CD74	MAL	IRF7		SRGN	FOS	HLA-DPB1	TOMM7	SMDT1	PHLDA1	LDHB	VIM	CXCR6	CNN2	NLRC5	IGKC	ETS1	ZEB2	TRABD2A	UBC	LY6E	FTH1	LIME1	TBX21	PVRIG
MCL1	HTATIP2	SERINC5	OASL		DUSP4	PPP1R15A	GNLY	LDLRAP1	C6orf48	GAPDH	PLAC8	TNFAIP3	RGS2	FCRL6	H3F3AP4	BTG1	TIPIN	MYO1F	PASK	PPP1R15A	TNFSF10	GZMK	HLA-DRB5	PXN	SLAMF7
LYAR	CD27	INPP4B	IFIT2		PPP1CC	CACYBP	APOBEC3G	ACTN1	MYC	RORA	TMC8	BTG1	GNLY	ZAP70	ITM2A	FKBP5	UBALD2	C12orf75	DONSON	DNAJA4	SAMD9	NAA50	FXYD2	TRIR	SMG1P1
S100A11	GBP5	PLAC8	GBP1		PDE7B	DUSP1	CD99	VAMP2	RIPOR2	CCR6	SCML4	CD69	PHLDA1	FGR	PVRIG	GPR171	TXNIP	ASCL2	FLT3LG	TNFSF9	IRF7	CXCL8	NUCB2	ATP5F1D	NPIPB3
TTC19	GK	TSHZ2	IFI27		CORO1B	EGR1	S100A4	RASGRP2	TRAF3IP3	MSC	TMEM66	TUBA4A	DUSP4	TMEM66	NPIPB5	FAM102A	MLXIP	TBX21	TXK	CHORDC1	PLSCR1	HLA-B	CORO1A	TTC38	DDX17
CD69	CD7	FHIT	PARP9		AHI1	GADD45B	HLA-DRA	LDHB	TXK	FURIN	FAM65B	CMC1	IGKC	SAMD3	NPIPB3	MIAT	FOXP1	DSTN	IL7R	UBB	ISG20	SRGN	PSMB10	TRGV10
ADGRE5	IL2RB	ACTN1	SAMD9		H2AFZ	UBB	SH3BGRL3	C1orf162	FHIT	LPXN	ADD3	CREM	GAPDH	TBC1D10C	DENND2D	SCML4	ATM	TGFBR3	UQCRB	DUSP1	CMPK2	HLA-A	RAC2	HIST1H1E
FKBP11	STAM	KLF2	CMPK2		TNFRSF4	UBC	ANXA2	ATM	BIN2	CCL4	ABLIM1	ZNF331	KIR2DL4	MATK	CCR5	TSC22D3	SORL1	PRF1	LDLRAP1	JUN	GBP1	CMSS1	GIMAP4	PLAC8
PIK3R1	LINC00152	MAML2	IFITM1		C9orf16	DNAJB4	CLU	FAM65B	CD48	PDCD4	RIPOR2	FAM177A1	HLA-DRA	STOM	FAIM3	MGEA5	FAM65B	LGALS1	PABPC1	MRPL18	NT5C3A	EZR	FAIM3	PTGDR
CD55	DNPH1	FLT3LG	RNF213		LAT	RGS2	S100A6	TMIGD2	GPSM3	CLDND1	ITGA6	ANXA1	HLA-DRB1	ITGB2	SRPR	TRBC2	NAP1L1	BIN2	UBA52	RGS2	IFI35	CCR4	ARPC1B	TPST2
TSC22D3	IL1R2	TGFBR2	UBE2L6		BTLA	CCL4	PRF1	AES	ALKBH7	FKBP4	GLTSCR2	MCL1	PRF1	PPP1R18	C1orf63	RBMS1	NOSIP	EMP3	SH3YL1	IFNG	IFI16	CD5	SH2D1A	FYB1
FAM177A1	DUSP4	GIMAP7	TRIM22		CPM	IFNG	C12orf75	ATP5O	ATM	LGALS1	TMEM123	UBE2S	CD7	CD97	SLC20A1	ANKRD28	CD48	CD300A	C1orf162	AHSA1	OASL	NFATC2	GIMAP5	MATK
AREG	GBP2	LDHB	OAS2		GK	RHOB	LCP1	KLF3	FBL	AHR	ACTN1	METRNL	SIRPG	POLD4	CD27	HNRNPL	LDHB	TTC16	EIF3L	ATF3	OAS2	PPP1R14B	PPP1CA	RASSF1
TOB1	HLA-DRB1	AIF1	PLSCR1		GAPDH	MRPL18	ITGB2	UQCRB	SH3BP5	TNFRSF18	ARHGAP15	KLF6	CD27	LCP2	TAPSAR1	IKZF1	EEF2	KLF3	NACA	NEU1	PARP14	FYN	PPP1R18	ATP5MF
ARL4C	LAIR2	SELENOH	TNFSF10		TNFRSF18	DNAJA4	CXCR3	KLF2	CDC25B	TANK	CISH	BTG2	CTSD	GIMAP5	TUBB4B	GNAS	ARHGAP45	TTC38	NPM1	ANKRD37	CXCL13	EOMES	CADM1	SYNE1
ANXA2	RGS1	TRAF3IP3	IFI16		NME1-NME2	BTG2	ITGB1	UBA52	EIF2S3	CACYBP	EEF1B2	REL	GALNT2	EOMES	CHI3L2	AIM1	SATB1	MATK	KLF2	TCP1	PARP9	AOAH	MYL6B	ATP5IF1
FOSB	PIM2	ABLIM1	PARP14		GPX1	CHORDC1	CYBA	MYC	ACTN1	ZEB2	ARHGAP45	TSC22D3	GEM	GZMM	MYADM	CD81	C19ORF43	ADRB2	SPINT2	TNFSF14	TRIM22	TGIF1	SASH3	ELOB
KLF6	MIR4435-1HG	ADD3	SP110		CXCR5	ATF3	AHNAK	FOXP1	PSIP1	KIAA0319L	DGKA	SLC2A3	SNAP47	PTGDR	CPNE1	FYB	FCMR	CD320	NAP1L1	EGR1	TYMP	IL9R	CLIC1	ATP5F1A
NR4A2	GLRX	EIF3E	IFI35		PGAM1	AHSA1	COTL1	ABLIM1	CCND3	CAPG	STMN3	NR4A3	ITGAE	GBP5	PIP4K2A	MDFIC	EEF1B2	PXN	MYC	DEDD2	UBE2L6	VIM	RNASEK	CDC25B
TIMP1	HPGD	MYC	BST2		PKM	TNF	CLIC1	APBA2	BIN1	TIFA	RASA3	IL7R	PTMS	HCST	FOS	LAPTM5	KLF2	C1orf21	SERINC5	SOD1	LGALS9	CD28	ZYX	ATP5MD
TGFB1	HLA-A	ATP5MC2	USP18		RNF19A	NEU1	CD63	SH3YL1	EIF3L	NCDN	IFITM1	DUSP1	ALOX5AP	TRAF3IP3	ZNF331	CXCR4	C19ORF53	FLNA	FOXP1	GADD45B	EEF1A1P5	CMTM7	NME1-NME2	ATP5MC3
PTGER2	ICA1	OXNAD1	LGALS9		ZBED2	IER2	CD52	NPM1	UXT	SOX4	SUN2	SRGN	TIMD4	INPP4B	SKIL	UBL3	RASGRP2	TPST2	EEF2	TNF	BST2	EMD	PYCARD	TGFBR3
AQP3	ICOS	DGKA	SP100		PASK	DNAJB6	ID2		VAMP2	ANXA5	FHIT	PDE4B	LYST	MYO1G	TUBA4A	KLF13	FBL	ITGB2	RASGRP2	RHOB	DDX60	FAM102A	WDR1	ITGB2
CRIP1	UGP2	TMC8	DDX60L		THADA	DUSP2	S100A10		STMN3	ADAM19	GIMAP5	CSRNP1	ETV1	PPP1CA	JAK3	PDE7A	PABPC1	RORA	PFDN5	DNAJB6	HELZ2	PLP2	GABARAP	REX1BD
TAGLN2	ENTPD1	CAMK4	SLFN5		LIMS1	IER5	CTSW		CCR7	DNAJA1	TXK	TUBB4B	NKG7	SLAMF7	ITM2C	STT3B	TMEM123	LAIR2	NELL2	FOSB	SP100	ATP5MPL	IDH2	C1orf21
CRYBG1	GADD45A	FCMR	PPM1K		IL6ST	CD69	S100A11		SELENOH	H2AFZ	CCND3	CD44	BATF	TC2N	EEF1G	KLRD1	44448	PATL2	RGS10	FOS	SP110	PPP1R16B	ARF5	SASH3
CDKN1A	UCP2	TC2N	LAP3		RAB27A	SERTAD1	EMB		SH3YL1	ATP2B4	S1PR1	EIF1	CD63	IL16	DENND1C	PIP4K2A	GRK2	SAMD3	RCAN3	DOK2	USP18	SLC7A5	MIR4435-1HG	MYO1G
EZR	NAMPT	LPAR6	C19orf66		FKBP5	ANXA1	HMGB2		SPINT2	HSP90AB1	GPSM3	EZR	CD82	RBL2	INPP4B	MDM4	RCAN3	SH3BP5	CD55	TSPYL2	LAP3	SLC3A2	POLD4	SELENOH
SLC2A3	IFI6	AES	GZMA		MAF	KLF6	PARP8		EEF1B2	LMO4	TC2N	FAM46C	ZBED2	CORO1A	JUNB	IKZF3	PABPC4	MYO1G	C1orf228	IER5	DDX60L	COTL1	C12orf75	APMAP
PLP2	CCR8	FOXP1	DRAP1		ATP5G3	NR4A2	ATP5MG		KLF2	GNA15	TRAF3IP3	ATP1B3	PKM	CISD3	SRSF6	TOB1	MLLT6	S1PR1	SMDT1	CKS2	DDX58	CD44	PLEK	SAMD3
GLIPR1	ARID5B	TESPA1	GBP4		PFN1	TCP1	ANXA1		NUCB2	SQSTM1	TESPA1	TTC19	FKBP1A	CSK	TOX	RORA	POU2F2	RIPOR2	EIF3H	STIP1	RNF213	TGFB1	FKBP1A	PSMB10
The top 50 marker genes of different cell types in Wang et al. study

## Sheet: Supplementary Data 5
Supplementary Data 5. Curated gene signatures used to characterize T cells
Naïve	Cytotoxicity	Inhibitory	Proliferation	Costimulatory	Regulatory	Resident	Transcription factor
CCR7	GZMA	PDCD1	MKI67	CD27	FOXP3	CD69	IFI16
SELL	GZMB	CTLA4	TOP2A	CD28	IL2RA	ITGAE	ZNF683
TCF7	GZMK	LAG3	PCNA	ICOS	IKZF2	NR4A1	DRAP1
LEF1	GZMH	HAVCR2	TYMS	TNFRSF9	TIGIT		PRDM1
IL7R	PRF1	TIGIT	BIRC5	TNFRSF18	CTLA4		TOX
KLF2	GNLY	ENTPD1		CD40LG			RBPJ
	NKG7						ETV1
	FGFBP2						EOMES

## Sheet: Supplementary Data 6
Supplementary Data 6. 50 genes used to construct the T03 cell signature
CD8A
CD8B
CTB-91J4.1
FGFBP2
PZP
TRGC2
A2M
FCRL6
PPP2R2B
PLEK
TGFBR3
CX3CR1
MSC-AS1
NKG7
PDGFD
LAIR2
C1ORF21
ZEB2
THEMIS
RAP1GAP2
ADGRG1
MVB12B
KLRG1
SETBP1
GNLY
ITGAL
PRSS23
PTPRM
GAB3
KLRD1
A2MP1
PRR5L
C12ORF75
SAMD3
CST7
FLNA
ARHGAP10
MIR4435-2HG
S1PR5
HLA-DPB1
HLA-DRB1
SYNE1
GZMA
PRF1
LINC01871
SLAMF7
CTSW
MYO1F
TBX21
VCL

## Sheet: Supplementary Data 7
Supplementary Data 7. 50 genes used to construct the B mem and AtM B cell signature
B mem	AtM B
AIM2	SOX5
LINC01781	RP11-404H1.1
PLEKHG7	SYT1
CTD-2509G16.5	NRCAM
GRAMD1C	SLCO4C1
ANK3	ITGAX
MCOLN2	TBX21
CLECL1	RBPMS2
EPHA4	CD200R1
CD70	SIGLEC6
MARCKS	LINC02471
TMEM273	MIR3681HG
SGPP1	PLCL1
RAB31	LINC02137
DAAM1	GTSF1L
DAPK2	TTC28
FAAH2	TEX41
TBC1D9	TNFRSF1B
ITGAM	FGR
RASSF6	FGD4
NEXMIF	ENC1
AC008697.1	FCRL3
TEX9	FCRL5
CD82	ARL4D
COL4A4	IFNLR1
TNFRSF13B	SLC12A8
ITGB1	ANK2
IL2RA	CA8
PVT1	AC006369.2
FAM102A	SUSD5
NLRC5	RNF144A
LINC02324	GAS7
COCH	MPP6
NTNG1	LINC01754
PDE4D	RP11-47L11.1
OSBPL10	TOX
TFEC	ADAM15
TMEM163	TUBB6
ADAM29	GALNTL6
BCL2A1	TFEC
TCF7	MAP4K3
ARHGAP24	DGKG
NEK6	PYHIN1
COTL1	RP11-669M16.1
ZNF594-DT	SLC11A1
CAPG	ABHD6
VOPP1	SEMA7A
CSGALNACT1	DTX1
SSPN	GFOD1
KYNU	RIN3

## Sheet: Supplementary Data 8
Supplementary Data 8. Top 50 marker genes for Myeloid cell subsets in different studies
M01_pDC-LILRA4	M02_cDC1-CLEC9A	M03_cDC2-CD1C	M04_mDC-LAMP3	M05_Mono-CD16	M06_Mono-CD14	M07_Mono-CD247	M08_Mac-IL1B	M09_Mac-C1QC	M10_Mac-PLTP	M11_Mac-SPP1	F01_Fibro-DCN
LILRA4	CLEC9A	FCER1A	CCL19	CDKN1C	PADI4	GNLY	HLA-DQA1	LCN2	PLTP	PPARG	COL1A2
CLEC4C	RP11-761N21.1	CD1C	LAMP3	CD300H	S100A12	PPBP	CLEC10A	CD24	APOC1	OLR1	COL1A1
CH17-84K15.2	CLNK	CD1E	SLCO5A1	ZNF703	CDA	NKG7	MRC1	KRT8	C1QC	PSD3	PLAT
SCT	ENPP1	RP11-365O16.3	CCR7	GPBAR1	GLT1D1	PYHIN1	HLA-DQB1	CLDN4	APOE	DOCK4	CCDC80
SHD	PREX2	HLA-DPB2	FSCN1	TCF7L2	PLBD1	SKAP1	HLA-DPA1	KRT18	C1QA	CCL2	COL3A1
LINC01478	XCR1	TRPC6	ADAM12	CFP	LINC00937	KLRD1	CCSER1	KRT19	C1QB	PHLDA1	DCN
RP11-71G12.1	MIR924HG	RP11-404O13.5	S100B	RP11-750H9.5	NLRP12	CD247	HLA-DPB1	APOE	FOLR2	DHRS3	SLIT3
SMPD3	PAK3	KIT	MREG	CX3CR1	CRISPLD2	ETS1	AFF3	HSPB1	TREM2	SH3RF3	C1R
PACSIN1	DNASE1L3	SIGLEC6	DUSP4	FAM110A	NCF1C	SYNE2	FCGR2B	C1QB	GPNMB	SLC39A8	GPC6
DERL3	EGFEM1P	PKIB	ENOX1	NBPF26	SMARCD3	THEMIS	HLA-DRB1	FN1	LGMN	TGM2	SLPI
COL24A1	RAB7B	NDRG2	BIRC3	LILRA1	CSF3R	LEF1	F13A1	RNASE1	RNASE1	FBP1	CACNA2D1
MAP1A	SNX22	HLA-DOA	ANKRD33B	ADGRE3	MSRB1	KLF12	HLA-DRB5	C1QC	SDC3	SEMA6B	PTGIS
RGS7	KCND3	PARM1	MARCKSL1	ICAM2	MPP7	PF4	HLA-DRA	RASAL2	SLC2A5	PLIN2	EGFL6
MIR4432HG	ENOX1	ABCA6	PLEKHG1	ULK2	NRG1	GZMA	CD2	LMNA	ECM1	FLT1	C1S
TSPAN13	NCKAP5	HLA-DQB2	TRAF1	NAAA	MEGF9	CD96	LAP3	C1QA	NRP2	THBD	CLDN1
LAMP5	FBXO27	ST18	NET1	FAM117B	AGTRAP	IGHA1	H4C3	CTSL	KCNMA1	MERTK	PIEZO2
KCNK10	ANKRD20A1	CD72	SLC41A2	PLAGL2	NFAM1	BCL11B	NFATC2	DIRC3	ACP2	FN1	CDH11
CUX2	ZNF366	AFF3	CLIC2	PILRA	VNN2	IKZF3	C1QB	C3	SLC7A8	TPST1	TENM3
NIBAN3	C1orf54	CLEC10A	CD40	XYLT1	TNFAIP2	BACH2	CD74	MT-ND6	NR1H3	TNS1	FLRT2
PHEX	ROBO1	TLR10	NUB1	CARD16	F5	PZP	EPB41L2	FMNL2	MIR99AHG	FLNB	GRIA2
SERPINF1	MTUS2	SPINT2	P2RY10	WARS1	RNF24	IL32	NEGR1	MDM2	HAMP	BCL2A1	PTGER3
PROC	VMO1	CLECL1	ZBTB46	CFD	PRAM1	SAMD3	CMAHP	HSPD1	CTSL	TPRG1	EFEMP1
IGKJ1	CADM1	HLA-DQB1	TBC1D4	SECTM1	METTL9	TGFBR3	AUTS2	PTK2	TSPAN4	SDC2	FRAS1
LINC02812	CCND1	STON2	DUSP5	LINC02432	IRS2	IL7R	ST18	HSPH1	FRMD4A	MTHFD1L	GRIK2
SPIB	GNAO1	PLD4	USP53	SNAPC3	TKT	CH507-528H12.1	C1QA	CTSB	DAB2	MAFB	PAPPA
RP11-433N2.1	SEPTIN3	GPAT3	ETV3	ABI3	LRRK2	CAMK4	H1-4	MT-CYB	ITGB5	MARCO	VCAM1
CLIC3	LINC02149	SEZ6L	GSN	POU2F2	BST1	INPP4B	GALM	COLEC12	MMP14	EML4	COL8A1
CIB2	BTLA	HLA-DQA1	RAB9A	KDM1B	C19orf38	ITK	PPA1	MT-ND2	VSIG4	DSE	IGFBP4
RP11-203M5.6	THRB	CLIC2	FLT3	LST1	CREB5	GNG11	PPIB	MYO1E	COLEC12	PVT1	IL1R1
LRRC36	ANKRD20A4P	ABCB4	PPA1	SIGLEC10	ATG16L2	CAVIN2	HMGN1	MT-RNR1	PMP22	RGL1	CA12
ITM2C	HLA-DOB	PALLD	ZEB1	TNFSF10	NHSL2	MYBL1	RBPJ	MT-ND1	LNCAROD	CDK14	LUM
IGHJ2P	PDE1C	CCSER1	BTN2A2	LGALS2	PELI2	SCML4	CST3	MT-CO3	SCD	ALCAM	ADAMTS1
SCAMP5	PLEKHG4B	ZBTB46	EEF1A1P5	ITGAL	NCF1	SLC38A1	ATF7IP2	MT-ND4L	FABP5	ARHGAP18	ABI3BP
EPHB1	ASB2	PON2	HLA-DQA2	AATBC	IL17RA	PRF1	NPM1	MT-CO2	CD81	UPP1	ROR2
CYP46A1	APBA1	FCGR2B	MAP3K13	FGD2	RAB27A	CD3D	UBB	DST	NRP1	ADM	MIR100HG
SLC35F3	S100B	CD200R1	MBOAT2	GBP4	PLCB1	GRAP2	PDIA6	HSP90AB1	SLCO2B1	EREG	C3
AZIN2	MYEF2	CACNA2D3	NMRK1	SAMD4A	MICAL2	RASGRP1	CD1C	MT-RNR2	CMKLR1	ISG15	COL5A2
TTC24	ANKRD20A7P	CIITA	PALM2AKAP2	LILRB2	VSTM1	PRKCQ	MS4A6A	MT-ND5	OLFML2B	ALOX5AP	LAMA4
PTCRA	SAMD12-AS1	ENPP2	RFTN1	SCLT1	MEFV	TC2N	HSPA8	LGMN	GATM	TMEM51	COL5A1
LINC00996	DMD	AXL	LTB	CLEC12A	DGKG	CD3E	RPS26	MT-ND4	SMPDL3A	LUCAT1	PLS3
CXCR3	BCL2L14	AKAP6	IRF4	CD48	NACC2	CD3G	RPLP0	HSPA5	HMOX1	IL1B	CAVIN1
PTPRS	YWHAEP7	PPA1	MAP3K14	LFNG	DYSF	LINC01934	RPS5	MT-ND3	IDH1	MSR1	COL6A1
COBLL1	SCN7A	MRC1	HLA-DQA1	NR4A1	CCDC69	SYNE1	EEF1B2	GLUL	MAF	CD163	ADAMTS9
PLXNA4	SLCO5A1	HLA-DQA2	BTLA	CYSLTR2	ARHGAP24	TXK	ENPP2	FTL	EPB41L2	TBL2	LSAMP
FAM160A1	DUSP4	P2RY6	SINHCAF	PPARGC1B	ASGR2	TUBB1	HSP90AB1	SQSTM1	MITF	ARHGAP10	LDB2
TPM2	TMEM14A	GGTA1	PTMS	LRRC25	KIF13A	CLEC2D	ATP8B4	MT-ATP6	MS4A4A	SRGAP1	RBFOX1
LINC01226	DBN1	RAD51AP1	POGLUT1	NEDD9	CYP1B1	TCF7	TUBB	MT-CO1	FMNL2	LDHA	COL6A2
COL26A1	CLCN4	TMEM163	CST7	GPR155	CLEC4E	STAT4	H1-3	VSIG4	FTLP3	CXCL2	FAM155A
RASD1	SERPINF2	COX10-AS1	TMEM14C	TNFRSF1B	FBXL5	PRKCH	CALR	HSP90AA1	PLA2G15	FAM20C	ROR1
CRYM	NET1	CYP2S1	DSC2	SH2D3C	SLC24A4	CD2	CHCHD7	MARCO	ABCA1	OASL	PRG4
The top 50 marker genes of the different cell types in this study
c33_cDC.LAMP3	c34_cDC.MKI67	c35_cDC1.CLEC9A	c36_cDC1.CD3E	c37_cDC2.CD1C	c38_cDC2.C1QC	c39_cDC2.FCN1	c40_cDC2.TIMP1	c41_cDC2.CD3E	c42_pDC.LILRA4	c43_MonoDC.CLEC10A	c44_Mono.CD14	c45_Mono.FCGR3A	c46_Mono.CD14.FCGR3A	c47_Mono.CD3E	c48_Mph.FCN1	c49_Mph.NLRP3	c50_Mph.IL1B	c51_Mph.PLTP	c52_Mph.CXCL12	c53_Mph.C1QC	c54_Mph.SPP1	c55_Mph.MKI67	c56_Mph.CD3E	c57_Mast.CPA3	c58_ILC3.KIT
FSCN1	STMN1	CLEC9A	CLEC9A	CD1C	C1QC	S100A9	TIMP1	CCL5	PTGDS	HLA-DQA1	S100A8	FCGR3A	LGALS2	NKG7	S100A9	IL1B	HLA-DQA1	RNASE1	CD5L	APOE	SPP1	HMGN2	IL32	TPSAB1	IL7R
CCR7	TUBB	DNASE1L3	SNX3	JAML	C1QB	S100A8	INSIG1	IL32	GZMB	HLA-DQB1	S100A9	LST1	FCN1	KLRD1	S100A8	CCL20	HLA-DPB1	SEPP1	LIPA	APOC1	FBP1	H2AFZ	CCL5	CPA3	LTB
CCL19	HIST1H4C	SNX3	CADM1	COTL1	C1QA	FCN1	PLSCR1	KLRB1	IRF7	HLA-DPB1	S100A12	LYPD2	GABARAP	PRF1	THBS1	CXCL8	HLA-DPA1	LYVE1	CXCL12	C1QC	FN1	MKI67	CD3E	TPSB2	XCL1
LAMP3	HMGB2	CPNE3	CPNE3	LST1	FTL	VCAN	PLAUR	NKG7	LILRA4	SPIB	MNDA	LILRB2	CDC42EP2	FGFBP2	S100A12	EREG	HLA-DRA	FOLR2	FCGRT	C1QB	CSTB	TUBA1B	CD3D	TPSD1	KLRB1
BIRC3	TUBA1B	IDO1	CCL5	PAK1	CD68	C5AR1	EMP3	CD69	ITM2C	PPA1	LYZ	LINC01272	CLEC4E	CST7	VCAN	CXCL2	HLA-DQB1	F13A1	MARCO	CTSD	APOC1	BIRC5	PTPRCAP	CLU	TRBC1
TXN	TYMS	C1orf54	DNASE1L3	GDI2	FCGR2A	CFD	STX11	CD3E	CLIC3	HLA-DPA1	NCF1	PECAM1	CST3	KLRF1	PPIF	CCL3L3	CD74	MRC1	C1QB	ACP5	RETN	STMN1	IL7R	GATA2	CD7
MARCKSL1	HMGN2	CPVL	GZMA	SAMHD1	CSF1R	SERPINA1	LITAF	IFITM1	IRF4	CD74	FCN1	RHOC	LYZ	GNLY	TIMP1	CCL3	HLA-DRB1	C1QA	SDC3	GPNMB	IL1RN	TUBB	GZMA	MS4A2	KRT86
GRSF1	H2AFZ	TACSTD2	C1orf54	CD207	ITM2B	SLC11A1	SRGN	CD7	JCHAIN	PLD4	VCAN	IFITM3	CXCR4	GZMA	THBD	BCL2A1	CLEC10A	C1QC	CETP	C1QA	MIF	CENPF	GZMK	IL1RL1	TNFRSF18
NUB1	MKI67	WDFY4	TACSTD2	CLEC4A	VSIG4	CTSS	IL1R2	CD3D	RASD1	HLA-DRA	CSF3R	IFITM2	COTL1	CCL5	NAMPT	SOD2	HLA-DMA	STAB1	SEPP1	LGMN	ANGPTL4	HMGB1	CST7	HPGDS	AQP3
RAB9A	UBE2C	CADM1	XCR1	ENHO	CCL3	CLEC4E	SERPINB1	GZMK	LDLRAD4	HLA-DRB1	PLBD1	SERPINA1	RPL18A	GZMB	ANPEP	G0S2	C1QC	C1QB	C1QA	CTSB	ALOX5AP	CDC20	CD2	HDC	NCOA7
RASSF4	RRM2	RAB7B	IDO1	FCER1A	C3AR1	TSPO	FTH1	GZMA	SOX4	PPP1R14A	RBP7	MS4A7	AIF1	GZMH	PLAUR	IER3	C1QA	MS4A4A	C1QC	TREM2	MARCO	KIAA0101	IFITM1	KIT	LINC00299
KDM2B	HMGB1	IRF8	CLNK	CD33	MAFB	LINC01272	ATP1B3	PTPRCAP	NR3C1	GPR183	TKT	COTL1	HLA-DPB1	CD247	C5AR1	NLRP3	HLA-DMB	A2M	LILRB5	PLD3	GPNMB	UBE2C	CD7	HPGD	TMIGD2
KIF2A	TK1	XCR1	RAB7B	HLA-DQA1	CCL3L3	SLC7A7	CREM	SPOCK2	CXCR3	RPS23	CD36	WARS	FGL2	S1PR5	FPR1	PLAUR	C1QB	DAB2	HMOX1	CTSC	MCEMP1	TYMS	SPOCK2	SLC18A2	SPOCK2
LAD1	KIAA0101	CLNK	WDFY4	CORO1A	NPC2	STXBP2	EREG	CTSW	IL3RA	IDO1	CSTA	CUX1	PSME2	CTSW	G0S2	NFKBIA	HLA-DRB5	CD163	FOLR2	CTSZ	CTSD	GTSE1	TRBC2	LTC4S	KIT
EBI3	CKS1B	HLA-DOB	CD3E	RPS4X	MSR1	APLP2	IFITM3	TRBC2	C12orf75	GPR157	SELL	MTSS1	CTSS	IFITM1	ACSL1	ICAM1	CST3	SLCO2B1	NR1H3	CAPG	RGCC	TOP2A	CD8A	VWA5A	IL2RG
MGLL	H2AFV	SHTN1	KLRB1	PKIB	HSPA1B	PSAP	CDKN1A	ETS1	TSPAN13	CST7	IL17RA	CDKN1C	HLA-DRA	CLIC3	SLC11A1	PNRC1	NPC2	PLTP	TMEM26	TMEM176B	C15orf48	CCNB2	CD3G	CD69	CD96
POGLUT1	CENPM	CCND1	IL32	EEF1G	FCGR2B	TYROBP	PPIF	RORA	SEC61B	HLA-DOB	CDA	LYN	HLA-DPA1	GZMM	ATP2B1	CXCL3	MS4A6A	EGR1	SLC40A1	TMEM176A	S100A10	TPX2	ETS1	CTSG	TNFSF11
NCCRP1	BIRC5	NAAA	GZMM	PTPN6	DNAJB1	AIF1	NFE2L2	PRF1	SLC7A5	EEF1B2	PGD	LRRC25	FAM26F	SPON2	TREM1	THAP2	CPVL	GPR34	FTL	A2M	LDHA	H2AFV	TUBA4A	C1orf186	TNFRSF25
NDE1	TOP2A	KIAA0226L	NKG7	AFF3	A2M	CSTA	SAMSN1	CD96	EGLN3	HINT1	CLEC12A	OAS1	RPS13	CD7	AQP9	RBKS	CTSH	LGMN	LGMN	PRDX1	TGM2	CDKN3	SYNE2	BACE2	KRT81
CD200	CDK1	RGS10	GZMK	EIF3L	JUN	S100A12	BCL3	SH2D2A	IGKC	DNASE1L3	TALDO1	TCF7L2	AP1S2	PTPRCAP	LYZ	PTGS2	VSIG4	CSF1R	TIMD4	PLA2G7	OLR1	TK1	KLRB1	SOCS1	TCF7
DAPP1	DEK	PPT1	CPVL	PRCP	RHOB	S100A6	IFI30	CD247	C1orf186	FLT3	S100A6	PTPN6	SLC25A6	TRBC1	FCN1	PLEK	SDS	MSR1	MS4A7	GRN	CLEC5A	CKS1B	FAM46C	LMNA	SCML4
RPS27L	ZWINT	CYB5R3	CD7	FXYD5	SLCO2B1	FPR1	GPAT3	GZMM	PLD4	RPS3A	MEGF9	LILRA5	RPS24	HOPX	CEBPB	IL1RN	HLA-DOA	MAN1A1	IFI27	DAB2	ENO1	TROAP	LCK	CD9	AFF3
UBD	TPX2	TMSB4X	CD96	CFP	SLC40A1	AQP9	RILPL2	LCK	APP	ARL4C	AP1S2	CYTIP	VAMP8	ADGRG1	ITGAX	AQP9	GPR183	FILIP1L	AXL	PLTP	CTSB	PTTG1	ISG20	NSMCE1	CASP3
ARHGAP10	CCNA2	CAMK2D	KIAA0226L	RNASE6	HSPA1A	FTL	MXD1	CD3G	TCF4	EEF1G	NUP214	ABI3	CFP	KLRC3	CD55	WTAP	CEBPD	SLC40A1	PLD3	CREG1	ERO1A	NUCKS1	SH2D2A	CSF1	SPINK2
GPX4	NUSAP1	TMEM14A	KLRD1	STK17B	IER3	CD14	NINJ1	ITM2A	GPR183	RPS5	LRRK2	CFD	RPL7	CMC1	SOD2	CCRL2	HERPUD1	MAF	SERPING1	ATOX1	PGK1	CENPM	LTB	TSC22D1	PCDH9
SLCO5A1	CENPF	VAC14	CD3D	IL18	MS4A7	S100A4	NAMPT	SKAP1	PTCRA	PKIB	TSPO	AIF1	SAT1	PRSS23	TNFRSF1B	IL1A	CSF1R	CCL3	VCAM1	CD81	TPI1	PLK1	FYN	CNRIP1	TOX2
ANKRD33B	ASF1B	AIM2	TRBC2	TOB1	CCL4L2	TKT	IFITM2	CD2	MZB1	RPLP0	AHNAK	SPN	C10orf54	IL2RB	SERPINB1	PPP1R15A	FPR3	IGF1	CD163	CTSA	S100A11	HMMR	RORA	GALC	IL23R
RELB	AURKB	CD74	PRF1	TMEM14C	MGAT1	AGTRAP	VEGFA	IL7R	MYBL2	NDRG2	AGTRAP	SELPLG	EIF3K	FCRL6	CSTA	TNFAIP6	IL18	CCL3L3	BCAM	ADAMDEC1	ALDOA	CDK1	GZMM	RHOH	KIAA1324
ZFAS1	CDKN3	DBN1	RP11-761N21.1	LIMD2	CD163	CD300E	SH3BP5	SYNE2	SCT	BCL7A	EVI2B	STXBP2	SERPINA1	KLRB1	FTH1	DNAAF1	FCGR2B	MS4A6A	RGL1	MMP14	LGALS1	RRM2	CD6	RP11-354E11.2	TXK
MARCKS	ASPM	PLCD1	PTPRCAP	RGS19	GADD45B	ASAH1	EZR	TRBC1	PPP1R14B	HLA-DMA	CTSS	PILRA	SLC1A3	TBX21	SRGN	CCL4L2	RNASE6	GADD45B	CDH5	SLCO2B1	SDC2	GGH	LBH	TUBA1A	HNRNPA0
ANXA6	CDC20	RP11-761N21.1	FYN	MYL12A	LPAR6	SOD2	TNFRSF1B	FYN	DSTN	DUSP4	GLRX	C10orf54	CEBPD	CD160	CD93	CFLAR	MRC1	LILRB5	BLVRB	NPC2	CD63	CEP55	ITM2A	MAOB	ICOS
NRP2	PKMYT1	C1orf21	SH2D2A	LSP1	CTSC	LILRB2	LDHA	CD8A	DERL3	AFF3	S100A4	LILRA1	IGSF6	ZAP70	UPP1	TRAF1	IL13RA1	MERTK	CREG1	PTMS	PKM	FOXM1	CD247	BIRC3	ZFP36L1
TMEM176A	DHFR	PTK2	CTSW	CNN2	ATF3	S100A11	CD1C	CD6	ALOX5AP	NR4A3	FOS	LILRB1	CD48	SH2D2A	CSF3R	CCL4	PLD4	MS4A7	CTSL	SLAMF8	ANXA5	ANLN	SLC38A1	PTGS1	FAM177A1
IRF1	MAD2L1	ASAP1	ETS1	SPI1	GPR34	THBS1	MAP2K3	LBH	HSP90B1	RPS8	MYO1F	POU2F2	HLA-DQA1	TRDC	APOBEC3A	EHD1	RGS10	CCL4L2	SELENBP1	GAL3ST4	GAPDH	SHCBP1	IL2RG	CD82	IL4I1
CRIP1	CLSPN	BTLA	CD8A	HLA-DPB1	MS4A6A	ACSL1	HBEGF	TC2N	SERPINF1	HLA-DOA	MPEG1	KLF2	NME2	IL32	H3F3A	OLR1	SERPINF1	VSIG4	ITLN1	CD68	PDXK	AURKB	CD96	TIMP3	RORA
TBC1D4	CCNB2	ASB2	SPOCK2	CACNA2D3	CTSD	LRP1	GABARAPL1	TRAT1	TPM2	EZR	PRAM1	FAM110A	C1orf162	C12orf75	SLC25A37	GPR84	CD72	CD83	NDST3	NUPR1	GPI	NUSAP1	PBX4	LAPTM4A	PRMT9
TVP23A	GTSE1	TAP1	CD247	IGSF6	IGSF6	SH3BGRL3	CST7	ZAP70	POLB	CYP2S1	ITGB2	CX3CR1	DDIT4	SAMD3	RAB20	IRAK2	ID3	NRP1	MS4A6A	HLA-DMB	PGAM1	CCNB1	FKBP11	ACSL4	XCL2
ERICH1	NCAPH	LGALS2	RORA	LY86	TYROBP	NCF2	PIM3	CXCR6	EZR	INSIG1	NFE2	UNC119	NAGK	FYN	TSPO	NINJ1	RGS1	NRP2	CTSB	CTSL	GSTO1	HMGB3	STK17A	SLC26A2	TIPARP
ADORA2A	CASC5	GCSAM	SHTN1	SDPR	CCL4	PILRA	CLEC10A	ITK	PLAC8	HLA-DRB5	FBXL5	NAAA	PFDN5	ETS1	RILPL2	C15orf48	AOAH	ABL2	APOE	PMP22	ATP6V1F	MAD2L1	44075	BHLHE40	CTSW
VOPP1	HMMR	MZT2A	CCND1	CLEC10A	FCGR3A	LTA4H	FLT1	IKZF3	FAM129C	LGALS2	CORO1A	CKB	NUDT16	TRBC2	PLSCR1	TIMP1	FAM26F	PDK4	EBI3	LIPA	SLAMF9	KIF4A	CNOT6L	LEO1	LDLRAD4
IL15	DUT	UCP2	TMEM14A	CASP1	EGR1	TREM1	SLC2A3	SH2D1A	UGCG	NME2	MSRB1	NAP1L1	PRELID1	SLA2	S100A6	MIR3945HG	SLAMF8	ITM2B	RND3	C1orf54	IFI6	ASPM	CLEC2D	BTG2	CAT
ACHE	UHRF1	MPEG1	C1orf21	ZNF385A	PPP1R15A	CD68	PDE4A	KLRD1	LRRC26	CXCR3	NCF2	LIMD2	VAMP5	MATK	APLP2	SERPINB9	LGALS2	FCGRT	CCL3	YWHAH	MMP19	RAD51AP1	C12orf57	ALOX5AP	IGFBP4
LY75	MND1	FBXO27	DBN1	PPP1R14A	CTSS	NEAT1	G0S2	PBX4	TSPYL2	RPS6	ASGR1	HCK	HLA-DMA	LCK	BASP1	PIM3	SGK1	ITSN1	SLC7A8	ACP2	CTSL	ZWINT	TRAC	RGS1	44080
AOC1	CKAP2L	EGLN3	GZMH	ABI3	PDK4	CYBB	HLA-DRB1	CAMK4	SMIM3	CLEC10A	LAMTOR1	CSF1R	ATP5G2	PTGDR	ATP13A3	ETS2	ALDH2	RGL1	TMEM37	HLA-DQB1	EMP1	UHRF1	CD27	SYTL3	FXYD5
IL7R	MCM7	GSTP1	LCK	RIN3	CLEC10A	CSF3R	FCER1A	LAT	SMPD3	CLIC2	ARPC1B	GPBAR1	GSTP1	SH2D1B	FCAR	UPP1	GSN	CCL4	CCL4	HLA-DMA	RAB13	DIAPH3	FCMR	RGS13	AGPAT5
ISCU	CEP55	EEF1B2	SH2D1A	GAPT	RNF130	BLVRB	HLA-DQB1	FKBP11	MAP1A	HLA-DQA2	PYCARD	CORO1A	RPS9	LINC00861	CTB-61M7.2	NAMPT	MSR1	FOSB	CD68	CD63	ACP5	DTYMK	ACAP1	CD38	RORC
TRAF1	CENPK	TSPAN2	FBXO27	C1orf162	MRC1	OAZ1	NLRP3	IL2RB	CCDC50	GPAT3	JAML	SIGLEC10	APOBEC3A	PYHIN1	SLC43A2	PDE4B	AKR1B1	ATF3	TSPAN4	AKR1B1	CD9	CCNA2	CD5	SIGLEC6	LINC00176
TUBA1C	SPC25	FKBP1B	CD3G	CAT	FCER1G	CEBPB	CCR7	GATA3	CLEC4C	IRF4	43891	BIN2	PYCARD	TXK	S100A4	LINC00936	FCGRT	AP2A2	PLTP	AKR1A1	SLC11A1	FAM64A	CAMK4	ANXA1	ELOVL5
SIAH2	CDCA8	FLT3	CD69	PSTPIP2	CXCL8	APOBEC3A	RAB20	GZMH	PLP2	GNG7	SAMHD1	FAM26F	SPI1	CD3E	FLNA	NFKB1	DBNDD2	IER3	EPB41L2	MS4A4A	TNS1	PRC1	ITK	STMN1	MPG
PSD3	CDCA3	ACTG1	TUBA4A	IFITM2	SGK1	ZEB2	LMNA	SCML4	TRAF4	RPS7	NAIP	SPI1	PGLS	TMEM2	NLRP3	PPIF	ADAM28	FRMD4B	STOM	FPR3	PPARG	NUF2	TRAT1	RAB27B	EEF1A1
The top 50 marker genes of different cell types in Zhang et al. study
DC_01_CLEC9A	DC_02_CD1C	DC_03_LAMP3	DC_04_CD207	DC_05_LILRA4	DC_06_STMN1	Mast	Mo_01_CD14	Mo_02_CD16	Mono.like_01_CD14	Mono.like_02_CD16	Mono.like_03_CD14CD16	MonoDC	Mph_01_MARCO	Mph_02_CCL20	Mph_03_SPP1	Mph_04_TREM2	Mph_05_IL1B	Mph_06_CXCL9	Mph_07_SLC40A1	Mph_08_APOE	Mph_09_STMN1	Mu_01_MYH11	Mu_02_ABCC9	Mu_03_STMN1
CPVL	HLA-DRA	CCL19	S100B	GPR183	CD1C	TPSB2	VCAN	AIF1	EREG	MS4A7	HLA-DRA	FCER1A	MARCO	SPP1	SPP1	SPP1	SELENOP	CXCL10	SELENOP	APOC1	SPP1	ACTA2	NDUFA4L2	COL1A1
CST3	HLA-DPB1	TXN	FCGBP	SPIB	CST3	TPSAB1	S100A9	LST1	LYZ	IL1B	LYZ	LYZ	CD5L	CXCL3	GPNMB	APOE	LGMN	C1QB	C1QA	FTL	C1QB	TAGLN	ACTA2	ACTA2
HLA-DPB1	CLEC10A	BIRC3	HLA-DQB2	HLA-DQA1	HLA-DRA	DEFA3	LYZ	FCN1	THBS1	FCN1	HLA-DPB1	HLA-DQA2	C1QB	CCL20	CTSB	APOC1	CCL3	C1QA	C1QB	APOE	C1QC	C11orf96	CALD1	COL1A2
HLA-DPA1	HLA-DQB1	CCR7	CD1A	HLA-DQB1	HLA-DRB1	CPA3	S100A8	FCGR3A	FCN1	LST1	HLA-DPA1	CLEC10A	C1QA	EREG	MMP12	C1QC	C1QA	CXCL9	SLC40A1	C1QB	C1QA	TPM2	IGFBP7	NDUFA4L2
HLA-DQB1	HLA-DQA1	MARCKSL1	CD207	AREG	TUBA1B	CTSG	FCN1	CDKN1C	VCAN	FCGR3A	HLA-DRB1	CST3	C1QC	PLIN2	CTSD	C1QB	C1QB	C1QC	C1QC	C1QA	CTSB	MYH11	TAGLN	THY1
CLEC9A	HLA-DPA1	IDO1	FCER1A	HLA-DRA	HLA-DPA1	HPGD	S100A12	CTSS	IL1B	EREG	FCN1	SAMHD1	SLC40A1	CTSL	FTL	CTSB	CXCL3	APOE	RNASE1	C1QC	RNASE1	MYL9	THY1	TPM2
LGALS2	HLA-DRB1	FSCN1	HLA-DRB5	HLA-DPA1	HLA-DQB1	MS4A2	CTSS	MS4A7	S100A9	LILRB2	CST3	HLA-DQB1	CD163	CCL7	APOC1	CTSD	GPNMB	LGMN	LGMN	CD68	TUBA1B	CALD1	C11orf96	TAGLN
CD74	CD1C	LAMP3	HLA-DQB1	HLA-DPB1	HLA-DQA1	HPGDS	CSTA	CFD	MAFB	AIF1	HLA-DQA1	HLA-DPB1	LIPA	OLR1	FABP5	C1QA	CTSB	CTSZ	FOLR2	CTSB	CTSD	SPARCL1	BGN	CALD1
HLA-DRA	CST3	CCL22	HLA-DQA1	GRASP	HLA-DRB5	GATA2	CYP1B1	COTL1	CXCL2	MAFB	HLA-DQB1	HLA-DRA	MS4A7	CSTB	CTSL	GPNMB	RNASE1	HLA-DRB1	APOE	NPC2	TUBB	ADIRF	SPARC	COL3A1
HLA-DRB1	HLA-DRB5	CXCL9	HLA-DRA	HLA-DRB1	CD74	LTC4S	CYBB	POU2F2	SERPINB2	APOBEC3A	HLA-DRB5	HLA-DPA1	SELENOP	CXCL2	CSTB	PSAP	C1QC	HLA-DQA1	MS4A7	SPP1	APOE	SOD3	MGP	SPARC
SNX3	HLA-DQA2	LGALS2	HLA-DQA2	CD74	HLA-DPB1	CLU	S100A4	LILRB2	CTSS	CTSS	CD74	HLA-DRB5	FTL	RETN	NUPR1	TREM2	SLC40A1	CTSB	GPNMB	AIF1	PSAP	TPM1	COL18A1	FN1
HLA-DRB5	FCER1A	EBI3	CD1E	ATF5	STMN1	IL1RL1	S100A6	SPI1	NLRP3	COTL1	CLEC10A	VCAN	HMOX1	IL1RN	RNASE1	CD14	MS4A7	HLA-DRA	MS4A4A	HLA-DRA	NPC2	DSTN	COL6A2	TPM1
C1orf54	CD74	CD83	HLA-DPB1	PLAC8	LYZ	VWA5A	MNDA	FCER1G	C5AR1	CFD	IL1B	CD74	FOLR2	SLC11A1	CXCL3	CTSZ	FOLR2	CCL3	LIPA	GPNMB	CD14	MCAM	LHFPL6	BGN
HLA-DQA1	GPR183	PPA1	CD74	PLD4	FCER1A	HDC	TSPO	S100A4	PLAUR	HMOX1	HLA-DMA	CPVL	FCGRT	VCAN	APOE	CAPG	IL1B	PSAP	DAB2	TYROBP	APOC1	NDUFA4L2	CPE	COL6A2
IDO1	AREG	HLA-DPB1	HLA-DPA1	IFI30	GPR183	SLC18A2	TKT	STXBP2	CD300E	STXBP2	MS4A7	CD1C	CTSB	TIMP1	CD68	NUPR1	DAB2	HLA-DPA1	PSAP	CTSD	CD68	IGFBP5	COL4A2	POSTN
IRF8	LYZ	CCL17	CD1C	NR4A3	PCLAF	RHEX	PLBD1	CLEC12A	CSTA	WARS	AIF1	HLA-DQA1	MS4A6A	FBP1	PLIN2	MSR1	CXCL2	CD68	PLD3	CD74	STMN1	COL18A1	PDGFRB	COL4A1
CPNE3	LGALS2	NUB1	TACSTD2	IRF4	TUBB	KIT	AIF1	PSAP	ATP2B1	CDKN1C	SDS	FCN1	CD68	SERPINB2	LGALS3	GRN	CTSD	CD74	CTSB	FCER1G	TGFBI	IGFBP7	TPM2	LGALS1
WDFY4	HLA-DMA	DAPP1	PKIB	LILRA4	MS4A6A	ADCYAP1	CLEC12A	CYBB	APOBEC3A	LILRA5	MAFB	CSTA	CFD	LYZ	HMOX1	CD68	PLD3	CTSC	CTSD	MS4A6A	CTSZ	CSRP2	MAP1B	MYL9
HLA-DQA2	CPVL	RASSF4	HLA-DRB1	BID	HMGN2	RGS13	MPEG1	LILRA5	CYBB	RNF144B	MS4A6A	HLA-DMB	CST3	CD68	LGMN	HLA-DRA	PSAP	TMEM176B	CD68	HLA-DPA1	LGMN	MYLK	COL3A1	COL6A1
LYZ	IFI30	HLA-DQA1	GSN	HLA-DMA	CLEC10A	RAB27B	RETN	LYPD2	TIMP1	C5AR1	C1QA	C1orf162	VSIG4	SDS	PSAP	CD74	LIPA	HLA-DQB1	CD14	PSAP	DAB2	MFGE8	COLEC11	COL4A2
RAB7B	HLA-DMB	GPR157	CTSH	PPP1R14A	HLA-DQA2	CMA1	CD14	LRRC25	SLC11A1	FCER1G	NPC2	ENHO	VCAM1	MARCO	CTSZ	CTSL	CD68	MS4A7	CD74	LYZ	TREM2	ID4	COL4A1	COL6A3
RGS10	MS4A6A	HLA-DRA	NDRG2	SYNGR2	H2AFZ	MAOB	45717	SERPINA1	PPIF	IFI30	FGL2	JAML	CETP	C15orf48	MSR1	MAFB	APOC1	APOC1	MS4A6A	MSR1	FTL	PPP1R14A	TPM1	MAP1B
SHTN1	CD1E	GPR183	LTB	JAML	TYMS	MS4A3	CD36	TCF7L2	THBD	NLRP3	LGALS2	CFP	LGMN	S100A10	LIPA	NPC2	CTSZ	SLC40A1	CD163	TREM2	CAPG	FRZB	COL1A2	COL18A1
C1orf162	C1orf162	CSF2RA	PLEK2	IL4I1	HLA-DMA	PTGS1	AP1S2	TKT	CD14	SAT1	CPVL	HLA-DMA	CCL3	PLAUR	PLD3	HLA-DRB1	MS4A4A	FOLR2	HLA-DRA	LGALS3	FOLR2	NOTCH3	ASPN	TIMP1
CADM1	CTSH	DUSP5	HLA-DMA	CD86	S100B	CD9	LTA4H	FGL2	OLR1	PSAP	IFI30	LGALS2	BLVRB	GPNMB	NPC2	FTL	CCL3L1	HLA-DPB1	APOC1	MS4A7	GRN	ADAMTS1	FN1	IGFBP7
HLA-DMA	JAML	KIF2A	AIF1	HLA-DMB	MKI67	CAPG	POU2F2	HCK	HBEGF	TCF7L2	PSAP	COTL1	CFP	CTSB	TGFBI	LYZ	FTL	GBP1	HLA-DPA1	CTSZ	TOP2A	CRISPLD2	NOTCH3	UACA
DNASE1L3	CD86	HLA-DQB1	HLA-DMB	ETV3	CD1E	LCN2	STXBP2	DUSP6	CD44	SERPINA1	CTSH	CCDC88A	FCGR3A	FTL	SDS	FCGR3A	CD83	CD14	NPC2	LGMN	MS4A6A	PTP4A3	UACA	TUBA1B
MPEG1	GPAT3	TNFAIP2	PPM1N	IL3RA	CTSH	ANXA1	FGL2	C1orf162	AIF1	CFP	HLA-DMB	POU2F2	CREG1	SLC16A10	ACP5	TYMP	CCL4	LYZ	CCL3	CSTB	MS4A4A	LHFPL6	MYL9	TUBB
GSTP1	GRASP	LSP1	CST3	CCDC50	AP1S2	GRAP2	MS4A6A	TYROBP	ITGAX	LRRC25	CD68	HLA-DRB1	SDC3	CXCL5	SCD	HLA-DQA1	GPR183	NPC2	FCGRT	CD14	GPNMB	CSRP1	NR2F2	COL5A2
BATF3	HBEGF	ID2	CSF1R	CST3	TK1	LMO4	TYROBP	CFP	MPEG1	LYPD2	EREG	S100A4	MS4A4A	UPP1	LGALS1	SDS	MSR1	FTL	HLA-DRB1	PRDX1	FABP5	TINAGL1	CAMK2N1	CENPF
TACSTD2	FCGR2B	POGLUT1	YWHAH	ARL4C	CPVL	ANKRD28	KCTD12	FGR	ATP13A3	HES4	CD14	LY86	PLD3	VEGFA	CXCL2	OLR1	CD74	GRN	BLVRB	MS4A4A	H2AFZ	CAMK2N1	FILIP1L	TOP2A
FGL2	CSF2RA	GSTP1	CAPG	HLA-DQA2	CD1A	LMNA	NAIP	NAAA	KYNU	PILRA	CTSS	AP1S2	CPVL	MAFB	ABCA1	SGK1	FABP5	LIPA	GRN	CTSL	STAB1	PLAC9	SPARCL1	PTN
S100A10	NR4A3	CD40	C15orf48	METRNL	CAPG	LAPTM4A	APLP2	PTPN6	SLC43A2	SLC7A7	HBEGF	45717	LYVE1	MMP19	GLUL	HLA-DPA1	ATF3	PRDX1	FTL	FOLR2	MKI67	CRYAB	COL6A1	STMN1
NAP1L1	FGL2	TUBA1C	IL22RA2	IRF8	IFI30	CSF1	NUP214	PLAC8	LGALS2	POU2F2	CSF1R	ARPC1B	PDK4	FCER1G	ABL2	TGFBI	CD163	HLA-DMA	MRC1	HLA-DMA	MSR1	BGN	MFGE8	COL5A1
CTSZ	CIITA	HLA-DPA1	SPI1	RAB11FIP1	CKS1B	ARHGAP18	NCF2	LILRB1	GPCPD1	NR4A1	CYBB	SPI1	LILRB5	CTSD	CAPG	PLD3	FCGR2A	PLD3	CTSZ	GRN	PLD3	MAP1B	MCAM	MCAM
XCR1	RNASE6	CD74	CKLF	COTL1	CENPF	ACSL4	HRH2	SLC7A7	AP1S2	TKT	C1orf162	GSTP1	CTSL	ABL2	CCL18	FCGR2A	APOE	GPNMB	HLA-DMA	FABP5	TYMS	PDGFRB	COL1A1	CLEC11A
PPA1	ITGAX	MGLL	IL18	CD83	SDS	AREG	TALDO1	PYCARD	TKT	SPI1	ADA2	RPS10	MRC1	IL1B	CCL3	LGALS3	NPC2	HLA-DRB5	MSR1	CAPG	CYBB	PDLIM3	PPP1R14A	PTMS
S100B	PLD4	BASP1	SERPINF1	EZR	UBE2C	CAVIN2	ARPC1B	PILRA	APLP2	TIMP1	C1QC	CIITA	AXL	LGALS3	TREM2	LGMN	HLA-DRA	MS4A6A	HLA-DPB1	RNASE1	VSIG4	ADAMTS4	HIGD1B	NUCKS1
PPT1	INSIG1	CTSH	C1QC	HLA-DRB5	AIF1	FOSB	PYCARD	TYMP	CFD	MTSS1	C1QB	SLC25A6	APOE	INHBA	HK2	RGS1	BLVRB	TYMP	MAFB	SELENOP	PCLAF	MGP	TIMP1	LUM
LSP1	SAMHD1	HLA-DRB1	MS4A6A	LTB	HLA-DMB	RAB32	IL17RA	CSF1R	CD93	CD55	GPR183	CLEC12A	MAFB	CD44	GRN	TMEM176B	CCL4L2	MMP9	HLA-DRB5	LIPA	TUBA1C	ACTG2	ADAMTS1	PTTG1
TMSB4X	PPA1	MARCKS	SYNGR2	HERPUD1	TOP2A	CD69	DUSP6	S100A6	PSAP	ZEB2	TYROBP	FGL2	ADAP2	HMOX1	PLTP	HLA-DMB	NR4A2	MS4A4A	GPR34	CREG1	BLVRB	CAV1	ID4	PLAC9
CCND1	TYMP	GRSF1	AXL	CHMP1B	PKIB	TSC22D1	PGD	LYN	ACSL1	FGL2	GRN	RPL36A	CXCL12	IER3	APLP2	IL4I1	CTSL	HLA-DMB	SLCO2B1	DAB2	CD163	GJA4	PLAC9	PDGFRB
GPR157	COTL1	RAB9A	HPGDS	REL	INSIG1	NFKBIA	MEGF9	TNFRSF1B	VEGFA	CD300E	KLF4	EIF3L	NPC2	TYMP	BLVRB	CD9	SDS	IER3	CST3	HMOX1	UBE2C	PGF	ID3	H2AFZ
RAB32	MAT2A	SYNGR2	CPVL	PPA1	HMGB2	RRAD	SERPINB1	GPBAR1	TYMP	FGR	TYMP	KCNK6	MSR1	CCL2	SLC16A10	MS4A6A	HLA-DRB1	CD5L	CPVL	BLVRB	CDK1	SELENOM	GJA4	NOTCH3
HLA-DMB	SGK1	GPX4	CD86	SERPINB9	YWHAH	RGS10	SAMHD1	CST3	AREG	TYROBP	HLA-DQA2	CD33	FUCA1	CCL3	CREG1	HLA-DMA	CD14	IL1B	CSF1R	TMEM176B	HMGN2	COL14A1	CCDC102B	MFGE8
TSPAN33	ARL4C	NCCRP1	RGS10	S100B	COTL1	MPP1	TNFSF13B	MTSS1	SERPINB9	CTSC	IER3	TSPO	AIF1	IFI6	PLA2G7	HMOX1	GRN	IL4I1	ADAP2	PLD3	CD74	CPE	FRZB	PCOLCE
SLAMF7	CEBPD	TYMP	ALOX5AP	ACOT7	DUT	CD24	C1orf162	CD300E	DUSP6	ZFAND5	CEBPD	S100A9	CTSS	AREG	MMP9	RNASE1	IER3	CTSD	HLA-DQA1	SLC40A1	CCL3	CAVIN3	PDLIM3	MYLK
NAAA	SDS	ALDH2	LST1	SOX4	AREG	RETN	CFD	VSIR	PLIN2	MT2A	SGK1	CTSH	FCER1G	ISG15	CCL20	HLA-DRB5	HLA-DPA1	CST3	HLA-DMB	NUPR1	LGALS1	TBX2	COL6A3	PPP1R14A
CLNK	HERPUD1	RGS1	CLDN1	PTGDS	HIST1H4C	TUBA1A	ASGR1	MPEG1	CXCL3	BAG3	PLIN2	S100A10	MPEG1	NUPR1	CCL2	CXCL9	CCL18	SELENOP	STAB1	CXCL10	SELENOP	CNN1	SOD3	TYMS
TXN	ATP1B3	TMSB10	GPR183	TXN	FCGBP	NCOA4	RBP7	MAFB	CCL20	ZFAND2A	AREG	MS4A6A	MT2A	CXCL10	MT1G	CXCL10	PLA2G7	RNASE1	CREG1	MT1G	MT1G	JAG1	CD36	ITGB1
The top 50 marker genes of different cell types in Zhang et al. study

## Sheet: Supplementary Data 9
Supplementary Data 9. Curated gene signatures used to characterize DC cells
Antigen presentation	Apoptosis	Differentation	Immune suppressive
AP1M2	AKT3	DHRS2	CD274
ACTR1B	IRAK3	LILRB2	PDCD1LG2
ACTR1A	CHP1	CEBPB	CD200
BCAP31	CHUK	UBD	IDO1
PSME3	CSF2RB	BATF	EBI3
PSMD14	DFFA	LILRB1	IL4I1
CLEC4M	DFFB	BATF2	SOCS1
SEC24B	ENDOG	CCR7	SOCS2
IFI30	AKT1	ZBTB46	SOCS3
SEC23A	AKT2	CSF2
DCTN2	ENDOD1	AGER
CENPE	PIK3R5	F2RL1
DCTN6	APAF1	FCGR2B
SEC24A	BIRC2	FLT3
KIF2C	BIRC3	GAS6
KIF3A	XIAP	GATA1
DCTN3	FAS	TMEM176B
CHUK	IKBKB	HLA-G
OSBPL1A	IL1A	HMGB1
AP2M1	IL1B	RBPJ
AP1S1	IL1R1	IL4
AP2S1	IL1RAP	IRF4
CLTA	FASLG	LGALS9
CLTC	IL3	AC005840.1
PSMB11	IL3RA	LYN
AP1S3	IRAK1	MIR155
DYNLL2	IRAK2	MIR223
PSMA8	MYD88	TREM2
CTSD	ATM	TMEM176A
CTSE	NFKB1	BATF3
CTSL	NFKBIA	AXL
CTSV	NGF	PRTN3
CTSS	NTRK1	PSEN1
CYBA	IRAK4	RELB
CYBB	PIK3CA	CCL19
AP2A1	PIK3CB	AZI2
AP2A2	PIK3CD	SPI1
AP1B1	PIK3CG	TGFB1
AP2B1	PIK3R1	TGFBR2
ACE	PIK3R2	TRAF6
DCTN1	CYCS	TRPM2
AP1G1	PPP3CA	CAMK4
DYNC1H1	PPP3CB	DCSTAMP
DYNC1I1	PPP3CC
DYNC1I2	PPP3R1
DYNC1LI2	PPP3R2
DNM2	PRKACA
FCER1G	PRKACB
FCGR1A	PRKACG
FCGR1B	PRKAR1A
FCGR2B	PRKAR1B
SEC31A	PRKAR2A
KIFAP3	PRKAR2B
PSME4	PRKX
KIF4A	BAD
KIF26A	BAX
KIF4B	BCL2
PYCARD	RELA
RACGAP1	BCL2L1
PDIA3	BID
HFE	CHP2
CD209	TNF
HLA-A	TNFRSF1A
HLA-B	TP53
HLA-C	TRAF2
HLA-DMA	CAPN1
HLA-DMB	CAPN2
HLA-DOA	CASP3
HLA-DOB	CASP6
HLA-DPA1	CASP7
HLA-DPB1	CASP8
HLA-DQA1	CASP9
HLA-DQA2	CASP10
HLA-DQB1	PIK3R3
HLA-DQB2	IKBKG
HLA-DRA	TRADD
HLA-DRB1	RIPK1
HLA-DRB3	TNFSF10
HLA-DRB4	FADD
HLA-DRB5	TNFRSF10D
HLA-E	TNFRSF10C
HLA-F	TNFRSF10B
HLA-G	TNFRSF10A
HLA-H	CFLAR
MR1	MAP3K14
IKBKB	AIFM1
ITGAV	EXOG
ITGB5
ARF1
KIF2A
KIF3C
KIF5A
KLC1
KIF11
KIF22
LAG3
LNPEP
NCF2
NCF4
CD207
CLEC4A
SAR1B
DYNC1LI1
DCTN4
ERAP1
TREM2
MARCHF1
TAPBPL
ACTR10
LGMN
B2M
PSMA1
PSMA2
PSMA3
PSMA4
PSMA5
PSMA6
PSMA7
PSMB1
PSMB2
PSMB3
PSMB4
PSMB5
PSMB6
PSMB7
PSMB8
PSMB9
PSMB10
KIF15
PSMC1
PSMC2
PSMC3
PSMC4
PSMC5
PSMC6
PSMD1
PSMD2
PSMD3
PSMD4
PSMD5
PSMD7
PSMD8
PSMD9
PSMD10
PSMD11
PSMD12
PSMD13
PSME1
PSME2
SEC13
ERAP2
SH3GL2
KLC2
NCF1
SLC11A1
SPTBN2
TAP1
TAP2
TAPBP
TRAF6
RAB7A
CALR
KIF18A
CANX
CAPZA1
CAPZA2
CAPZB
RILP
DCTN5
KIF2B
IKBKG
DYNLL1
VAMP8
CTSF
SNAP23
AP1S2
AP1M1
VAMP3
CAPZA3
KIF3B
CD36
PSMF1
AC027237.1
SEC22B
SEC24C
CD74
PSMD6
SEC24D

## Sheet: Supplementary Data 10
Supplementary Data 10. M1 and M2 gene signatures used to characterize macrophages
M1	M2
IL1B	IL4
INFG	IL13
CSF2	CCL17
CD80	CCL22
CD86	CCL24
IL1R1	IL10
HLA-DR	TGFB1
TLR2	CCL13
TLR4	VEGFA
IFNR2	EGF
IFNR1	PDGFA
FCGR1A	PDGFB
CXCL9	MMP9
CXCL10	VEGFB
CXCL11	VEGFC
TNF	VEGFD
IL6	TGFB2
IL12A	TGFB3
IL12B	MMP14
IL23A	MMP19
IL1A	SEPP1
NOS1	ARG1
NOS2	IDO2
ROS1	CD163
SLC2A1	MSR1
TFEB	STAB1
STAT1	MARCO
NFKB1	CD36
STAT3	FCGR2A
IFR3	IL1R2
IFR5	IL4R
IFR7	CD274
SOCS3	PDCD1LG2
JUN	PDCD1
	SIRPA
	SIGLEC10
	S100A9
	LILRB1
	LILRB2
	VTCN1
	TEK
	TREM1
	TREM2
	IL1RN
	STAT6
	MAFB
	IFR4
	SOCS1
	CHI3L1
	AXL

[truncated: 4 more sheets: Supplementary Data 11, Supplementary Data 12, Supplementary Data 13, Supplementary Data 14]
